# Supplementary material
Source: publisher site journal article supplement (https://www.dovepress.com/get_supplementary_file.php?f=230332.xlsx)
Supplement: Supplementary file 1 [file get_supplementary_file.php]

## Sheet: 1 Clinical information
Sheet 1:The clinical information of 100 acute minor stoke patients and healthy controls was shown.
Acute minor stroke								Healthy control
Number	Gender	Age	Hypertention	Atrial fibrillation	Smoking	Drinking		Number	Gender	Age	Hypertention	Atrial fibrillation	Smoking	Drinking
1	F	83	√	√				1	M	51
2	M	70		√	√	√		2	M	49				√
3	M	60				√		3	F	32
4	M	66	√			√		4	M	49			√
5	M	62		√				5	M	49			√
6	M	61		√	√	√		6	M	55				√
7	M	40	√			√		7	M	50
8	M	68						8	M	46
9	F	62		√	√			9	M	51
10	M	78						10	M	57
11	F	73	√					11	F	53			√
12	M	63	√	√				12	F	56
13	M	55			√	√		13	F	57				√
14	F	43		√		√		14	M	51			√
15	M	77	√	√	√	√		15	M	54
16	M	38				√		16	F	56			√	√
17	F	50	√					17	M	46
18	M	51		√				18	M	26
19	M	67	√	√				19	M	48			√
20	F	73				√		20	F	49				√
21	M	71				√		21	F	58
22	M	69	√			√		22	M	50
23	F	32		√				23	M	49			√
24	M	69	√					24	M	43			√
25	M	49						25	M	42
26	M	65			√			26	M	41
27	M	50						27	M	45
28	M	47						28	M	48
29	M	61	√			√		29	F	42
30	F	67						30	M	58
31	F	75		√		√		31	F	53				√
32	F	61						32	M	43
33	F	77						33	M	45
34	M	51		√				34	F	44
35	M	54						35	F	47
36	F	76	√					36	M	38			√
37	M	46			√			37	M	50
38	M	26	√		√			38	M	51				√
39	M	48			√			39	M	47
40	F	52	√		√			40	F	43
41	M	69						41	F	47			√
42	M	69						42	M	40
43	F	32	√					43	M	40
44	F	69						44	M	56			√
45	M	49						45	M	52
46	F	65						46	M	51
47	M	53						47	M	51				√
48	M	46						48	F	48
49	F	61			√			49	F	42
50	M	68						50	M	48			√
51	F	73		√				51	F	43
52	F	66						52	M	33
53	F	77						53	M	45				√
54	M	57	√					54	F	43
55	M	54						55	M	37
56	F	76		√				56	M	43
57	M	46						57	M	50
58	M	33						58	M	51			√	√
59	M	48						59	M	37
60	F	49		√				60	F	53
61	M	71						61	F	54
62	M	69						62	M	48
63	F	42	√					63	M	43
64	M	69						64	F	46			√
65	M	49			√			65	M	42
66	M	65		√				66	M	41
67	M	50	√			√		67	M	43				√
68	M	46						68	M	38				√
69	M	61		√				69	F	32
70	M	67						70	M	48
71	F	73						71	F	53
72	F	66			√			72	M	43			√
73	F	77						73	F	55
74	M	51						74	F	46
75	M	54						75	M	47
76	F	76		√				76	F	38				√
77	M	46	√		√			77	M	52
78	M	42						78	M	51
79	M	48		√				79	M	47
80	F	49						80	F	53			√
81	M	71			√			81	F	42
82	M	69	√					82	M	40
83	F	32						83	M	40
84	M	69			√			84	M	46
85	M	49						85	M	42
86	M	65		√		√		86	M	41
87	M	50						87	M	43
88	F	46						88	M	38
89	M	61	√					89	F	42
90	M	67						90	M	38				√
91	F	73	√					91	F	33
92	F	66						92	M	43
93	F	77			√			93	M	45
94	M	53	√	√				94	F	46
95	M	54						95	M	37			√
96	F	76				√		96	F	54
97	M	46						97	M	50
98	M	46	√					98	M	51
99	M	57						99	M	43			√
100	F	56						100	F	45

## Sheet: 2 All detected lncRNAs
Sheet 2: All detected lncRNAs in serum exosomes between acute minor stroke patients and healthy controls were presented.
lncRNA_ID	Gene_ID	Foldchange	PValue	FDR	H#1	H#2	H#3	P#1	P#2	P#3		H represents healthy control.
AADACL2-AS1:1	AADACL2	-2.36195	0.265129	0.501733	37.8203	7.88543	7.4755	11.4303	0	10.9846		P represents AMS patient.
AATBC:3	RRP1	-47.8371	0.104792	0.293253	1.47952	1.02219	0	0	0	0
AATBC:8	RRP1	-268.621	0.000625776	0.0213875	8.13737	4.23477	1.93809	0	0	0
ACTN1-AS1:2	ACTN1	-126.746	0.0155367	0.110814	3.88374	1.31424	1.52279	0	0	0
ADAMTS19-AS1:2	ADAMTS19	-1.96829	0.533021	0.751116	2.21928	1.31424	4.56836	0.259781	0	4.22487
ADAMTS9-AS2:1	ADAMTS9	-3.4217	0.411139	0.648138	1.10964	0	6.92176	2.07824	0	0
ADGRA1-AS1:6	ADGRA1	-131.197	0.0187471	0.121956	6.93526	0	0	0	0	0
ADNP-AS1:6	ADNP	4.39986	0.0828588	0.257923	2.31175	1.16821	1.38435	12.2097	2.44947	6.75978
ADORA2A-AS1:1	ADORA2A	-3.4795	0.192811	0.414626	2.68163	1.31424	4.15305	1.2989	0	0.844973
ADPGK-AS1:2	ADPGK	3.42024	0.199711	0.423246	0.18494	3.21258	2.3534	16.626	0	2.53492
ADPGK-AS1:4	ADPGK	3.8172	0.479157	0.705591	1.75693	0	0	6.75429	0	0
ALDH1L1-AS2:1	ALDH1L1	-28.2724	0.105781	0.294428	1.01717	0.146027	0.27687	0	0	0
ALDH1L1-AS2:2	ALDH1L1	-14.9689	0.0453871	0.188642	7.85996	0.730133	1.10748	0	0	0.844973
ALDH1L1-AS2:3	ALDH1L1	-46.8001	0.118961	0.31305	1.20211	0	1.24592	0	0	0
ANP32A-IT1:1	ANP32A	-102.059	0.0290916	0.15021	1.38705	0.292053	3.73775	0	0	0
AP4B1-AS1:1	AP4B1	4.82683	0.354943	0.593397	0.462351	0	0	2.33802	0	0
APCDD1L-AS1:1	APCDD1L	1.18111	0.885984	0.956289	2.31175	1.16821	0.969046	4.15649	0	0.844973
APTR:1	RSBN1L	4.70034	0.135739	0.337276	6.1955	0	12.1823	70.1407	0	16.0545
ARHGEF26-AS1:4	ARHGEF26	-9.72128	0.000177753	0.0108508	50.0263	95.2093	75.4471	5.45539	9.79788	7.60476
ARHGEF7-AS1:1	ARHGEF7	-2.92409	0.367778	0.603142	10.7265	4.08874	0.830611	4.93583	0	0
ARHGEF7-AS2:2	ARHGEF7	4.3292	0.165215	0.377083	1.75693	0	0.138435	6.75429	0.612368	0.844973
ARRDC3-AS1:1	ARRDC3	-3.2741	0.335709	0.578385	0.18494	3.94272	2.07653	1.55868	0	0
ATE1-AS1:3	ATE1	2.02492	0.454769	0.685002	2.40422	3.21258	2.90714	15.0673	0	1.68995
ATP1A1-AS1:1	ATP1A1	-2.95491	0.543141	0.759653	0.0924701	0	0	0	0	0
B3GALT5-AS1:1	B3GALT5	19.1379	6.0982e-05	0.00579226	7.85996	4.9649	4.15305	204.707	18.9834	102.242
BAALC-AS1:4	BAALC	11.7967	0.150345	0.357883	1.75693	0	0	20.5227	0	0.844973
BAIAP2-AS1:3	BAIAP2	4.66049	0.0833127	0.258455	0.462351	3.94272	0.830611	3.89671	12.2474	8.44973
BBOX1-AS1:4	BBOX1	-1.98861	0.598938	0.798544	0.462351	5.40298	0	2.07824	0.612368	0
BCYRN1:2	EPCAM	-9.95903	0.00217742	0.0393045	39.4847	39.5732	42.4996	7.53364	0	4.22487
BMPR1B-AS1:1	BMPR1B	4.22576	0.245301	0.477035	1.10964	3.65066	0	19.2238	0.612368	0
BMPR1B-AS1:2	BMPR1B	-94.7676	0.0213723	0.130284	1.20211	1.75232	2.07653	0	0	0
BOK-AS1:2	BOK	22.707	0.000898152	0.0262953	3.42139	3.65066	4.01462	148.075	0.612368	103.932
BOK-AS1:8	BOK	-44.4232	0.160872	0.371092	2.31175	0	0	0	0	0
BOLA3-AS1:10	BOLA3	-5.58914	0.0853317	0.26068	7.58255	6.42517	11.3517	0	0	5.06984
BOLA3-AS1:14	BOLA3	-2.07102	0.526348	0.744517	0.832231	2.92053	9.13672	1.81846	4.28657	0
BOLA3-AS1:2	BOLA3	1.26705	0.857247	0.944172	0	1.46027	5.39897	2.85759	0	5.91481
BRD2-IT1:3	BRD2	-143.399	0.012156	0.0983727	2.58916	3.79669	1.24592	0	0	0
BRE-AS1:1	BRE	10.1883	0.00658326	0.0719291	3.79127	3.79669	0	42.3442	15.9216	19.4344
BSN-AS2:1	BSN	1.55269	0.805798	0.919551	1.57199	0	0	2.33802	0	0
BSN-AS2:2	BSN	1.19881	0.900771	0.962987	4.16115	1.46027	0	4.93583	0	1.68995
BVES-AS1:1	BVES	-2.12163	0.469799	0.697961	8.22984	0.876159	21.8728	14.0281	0	0
BZRAP1-AS1:22	BZRAP1	538.632	5.0844e-05	0.00511623	0	0	0	17.6651	0	10.9846
BZRAP1-AS1:23	BZRAP1	2.62495	0.442115	0.674452	0	10.952	0	17.6651	0	10.9846
BZRAP1-AS1:9	BZRAP1	-710.546	0.00455384	0.0584868	3.14398	0	34.8857	0	0	0
C15orf59-AS1:1	C15orf59	-100.698	0.0225006	0.133389	0.832231	1.75232	2.7687	0	0	0
C20orf166-AS1:5	C20orf166	1.17926	0.914079	0.969997	0	4.3808	0	2.59781	0	2.53492
C21orf62-AS1:13	C21orf62	-1.27739	0.835777	0.933524	1.10964	2.1904	0.138435	2.33802	0	0
C5orf66-AS1:4	C5orf66	-198.985	0.0145327	0.107517	8.22984	0	2.3534	0	0	0
C6orf47-AS1:1	C6orf47	-1.87693	0.573544	0.780451	5.45574	0.146027	2.90714	1.2989	0	3.37989
C9orf173-AS1:1	C9orf173	55.5691	0.00754517	0.0779166	0	0	0	2.59781	0	0
CACTIN-AS1:3	CACTIN	-1.19294	0.88507	0.956258	1.38705	1.46027	0.969046	2.85759	0	0
CAHM:1	QKI	768.916	0.000411395	0.017297	0	0	0	40.7855	0	0
CAHM:2	QKI	1.88624	0.674054	0.849889	4.62351	1.75232	1.52279	0	0	15.2095
CAPN10-AS1:1	CAPN10	-2.37878	0.47025	0.698114	4.43856	1.31424	0	2.07824	0	0
CARMN:6	IL17B	-5.56041	0.143952	0.349272	10.9115	2.48245	3.32244	0	0	3.37989
CASC7:1	AGO2	-2.49417	0.378435	0.614612	3.6988	5.69503	1.52279	0	3.67421	0.844973
CASC9:1	HNF4G	2.43887	0.356858	0.594293	4.80845	8.03146	4.42992	11.1706	0	31.264
CASC9:5	HNF4G	1.99051	0.448767	0.679457	3.32892	3.79669	9.13672	4.15649	0	28.7291
CBR3-AS1:17	CBR3	1.14625	0.819329	0.923852	18.7714	19.4215	20.6268	11.6901	34.905	21.1243
CBR3-AS1:3	CBR3	-2.40067	0.500591	0.723434	3.23645	0	2.49183	2.07824	0	0
CBR3-AS1:30	CBR3	-1.51552	0.74007	0.884748	2.03434	1.89834	0.692176	0	0	3.37989
CCDC144NL-AS1:7	CCDC144NL	-2.35116	0.592371	0.792929	4.53103	0	7.06019	4.67605	0	0
CCDC18-AS1:10	CCDC18	-14.8546	0.00893045	0.0842713	7.76749	5.25695	17.5813	0	0	2.53492
CCDC37-AS1:1	CCDC37	1.17408	0.89386	0.960939	0	2.7745	0.415305	3.37715	0	0
CD27-AS1:7	CD27	-11.6716	0.0552518	0.206787	8.59972	17.9613	9.13672	0	0	3.37989
CD81-AS1:2	CD81	15.393	0.0660751	0.227942	2.40422	0	0	24.6791	0	13.5196
CEBPA-AS1:2	CEBPA	-78.2882	0.0543168	0.20545	0	0	4.15305	0	0	0
CEBPA-AS1:4	CEBPA	-189.411	0.032561	0.159326	0	0	10.1058	0	0	0
CECR5-AS1:1	CECR5	-9.04923	0.0912837	0.270993	6.84279	2.62848	0	0.779342	0	0
CECR7:6	GAB4	-3.12645	0.2152	0.441739	6.84279	11.9742	3.59931	0	4.89894	2.53492
CEP83-AS1:1	CEP83	-1.8716	0.629603	0.820906	1.66446	0.43808	4.84523	3.37715	0	0
CFLAR-AS1:8	CFLAR	-9.18959	0.0658812	0.227942	8.69219	15.0407	2.63027	0.519561	0	2.53492
CHKB-AS1:1	CHKB	-1.47203	0.789137	0.912141	1.8494	0	0.27687	0	0	1.68995
CHL1-AS2:1	CHL1	1.01818	0.986947	0.999519	5.82562	2.33642	0.415305	8.31298	0	0
CISTR:3	CALCOCO1	1.98571	0.733845	0.883162	1.20211	0	0	2.33802	0	0
COL18A1-AS1:1	COL18A1	-2.18432	0.525357	0.743913	1.75693	2.33642	0	1.55868	0	0
CPEB1-AS1:1	CPEB1	4.75724	0.0914341	0.271081	9.70936	0.43808	5.53741	36.1095	0	38.8688
CPEB1-AS1:2	CPEB1	9.47597	0.0360618	0.166532	1.01717	0.146027	1.24592	8.31298	0	15.2095
CRNDE:3	IRX5	29.6388	0.000363966	0.016529	1.10964	3.94272	0	96.8981	11.0226	42.2487
CSTF3-AS1:3	CSTF3	1.71491	0.602388	0.801035	1.94187	3.50464	2.63027	1.03912	10.4103	2.53492
CTBP1-AS2:4	CTBP1	1.4233	0.774771	0.90549	2.03434	3.50464	0	7.53364	0	0
CTBP1-AS2:6	CTBP1	1.19095	0.888175	0.95804	2.49669	0	1.24592	4.15649	0	0
CYP51A1-AS1:2	CYP51A1	4.87705	0.215456	0.441779	1.20211	2.48245	0	15.3271	0	2.53492
DANT1:2	RP1-241P17.4	-1.28452	0.745772	0.888251	16.3672	15.7709	1.38435	11.1706	0.612368	14.3645
DARS-AS1:1	DARS	-1	1	1	0	0	0	0	0	0
DARS-AS1:20	DARS	-108.305	0.0104568	0.0919134	1.10964	1.60629	3.04557	0	0	0
DCTN1-AS1:3	DCTN1	4.9754	0.15392	0.3616	0.647291	0	0.969046	1.03912	0	7.60476
DCTN1-AS1:8	DCTN1	1.25391	0.855559	0.943412	2.95904	0.584106	0	4.15649	0	0
DDR1-AS1:1	DDR1	-22.3815	0.00817267	0.0814203	7.1202	11.098	7.8908	0	1.22474	0
DENND5B-AS1:2	DENND5B	3.5146	0.357905	0.595005	1.47952	1.31424	0	7.27385	0	2.53492
DHRS4-AS1:2	DHRS4	-81.4361	0.0625662	0.222445	2.40422	1.89834	0	0	0	0
DICER1-AS1:1	DICER1	10.1375	0.110467	0.301733	1.47952	0	0	11.4303	0	4.22487
DIO3OS:12	DIO3	2.70195	0.339396	0.580749	6.65785	0	3.59931	20.0031	0	7.60476
DIO3OS:8	DIO3	1.45183	0.767624	0.901048	5.91809	0	0	5.97495	0	2.53492
DISC1-IT1:2	DISC1	-2.56141	0.474382	0.701546	2.7741	4.9649	2.3534	0	0	4.22487
DLEU1:50	DLEU1	-157.546	0.0114519	0.0959028	3.42139	4.9649	0	0	0	0
DLEU2:1	TRIM13	12.1669	0.0114222	0.0957732	0	8.90762	1.38435	77.6744	13.4721	33.7989
DLEU2:24	TRIM13	-1.24649	0.899294	0.962737	4.34609	0	0	0.259781	0	3.37989
DLEU2:26	TRIM13	-2.35152	0.186859	0.407027	51.8757	34.4623	16.1969	22.3411	2.44947	18.5894
DLG5-AS1:2	DLG5	15.4303	0.000109568	0.00801871	10.5416	7.1553	4.01462	202.109	37.3544	96.3269
DLGAP1-AS2:2	DLGAP1	-39.9436	8.35087e-05	0.00711726	47.0673	29.9354	32.2554	0	0	3.37989
DLGAP4-AS1:1	DLGAP4	1.0492	0.969432	0.990469	1.01717	0	7.75237	8.83254	0	0
DLX6-AS1:20	DLX6	-82.7104	0.041319	0.17979	0.739761	3.65066	0	0	0	0
DNAJC27-AS1:8	DNAJC27	-3.56968	0.166575	0.379115	6.1955	4.9649	3.46088	2.85759	0	0.844973
DPH6-AS1:1	DPH6	3.64251	0.312215	0.552852	0.554821	4.08874	0.553741	8.0532	0	10.9846
DPH6-AS1:3	DPH6	-1.24772	0.913934	0.969997	0	2.7745	0	2.07824	0	0
DPP10-AS1:2	DPP10	2.72881	0.440834	0.673779	0	2.48245	0	4.15649	0	2.53492
EGLN3-AS1:2	EGLN3	2.1086	0.607374	0.804187	1.38705	1.16821	0	5.19561	0	0
EIF2B5-AS1:1	EIF2B5	-9.19812	0.072922	0.23891	5.17833	2.33642	5.26053	0	0	1.68995
EIF3J-AS1:1	EIF3J	2.45171	0.402429	0.639197	0.739761	1.89834	0	3.11737	0	3.37989
EIF3J-AS1:4	EIF3J	-2.26781	0.629609	0.820906	0	3.50464	0	0	0	1.68995
ELOVL2-AS1:5	ELOVL2	10.1071	0.0110908	0.0939301	2.95904	3.21258	0	35.5899	8.57315	18.5894
EML2-AS1:1	EML2	-2.99156	0.390487	0.626883	8.22984	0	8.44454	5.19561	0	0
EMX2OS:5	EMX2	-2.90205	0.332974	0.575883	8.69219	3.65066	1.10748	0	0	5.06984
ENTPD1-AS1:2	ENTPD1	-52.6083	0.15085	0.357884	0	2.7745	0	0	0	0
EP300-AS1:1	EP300	-4.09028	0.174468	0.388971	17.4768	0	22.4265	3.11737	0	6.75978
EP300-AS1:2	EP300	-131.414	0.0267124	0.14409	0	7.00927	0	0	0	0
EPB41L4A-AS1:2	EPB41L4A	1.08953	0.93733	0.976852	7.49008	0.584106	0	4.93583	3.67421	0
EPHA5-AS1:2	EPHA5	74.0743	0.00761698	0.0781188	0	0	0	0	0	4.22487
EPHA5-AS1:3	EPHA5	8.1001	0.196771	0.419791	0	0	0.27687	2.33802	0	0
EPN2-IT1:2	EPN2	28.9024	0.0298156	0.152244	0.0924701	0.146027	0	4.93583	0	3.37989
ERICH1-AS1:5	ERICH1	2.05589	0.56549	0.775146	4.53103	0	2.63027	9.61188	0	5.06984
ESRG:1	CACNA2D3	-2.80796	0.32035	0.563063	0.924701	5.69503	2.21496	0.779342	0	2.53492
ESRG:2	CACNA2D3	-4.14254	0.0604849	0.218596	18.1241	34.9003	15.5047	6.49451	0	10.1397
EVX1-AS:5	EVX1	-1.99048	0.435333	0.667524	6.75032	17.9613	2.07653	11.1706	0	1.68995
EXOC3-AS1:1	EXOC3	-1.1608	0.920225	0.972151	3.6988	0	0	0.779342	0	2.53492
EXTL3-AS1:8	EXTL3	306.636	0.000816992	0.0248905	0	0	0	11.9499	0	4.22487
FALEC:2	ECM1	-1.11224	0.929914	0.975747	0	1.60629	1.24592	1.55868	0	0.844973
FAM201A:1	ANKRD18A	1.25353	0.838276	0.93461	3.88374	3.50464	0	8.83254	0	0
FAM215B:1	ARL17A	-1.6986	0.634092	0.823454	6.93526	2.92053	0	0	4.28657	1.68995
FAM27C:1	FAM27C	-4.24956	0.0650511	0.227055	19.4187	3.79669	11.0748	6.49451	0	0.844973
FAM66B:7	ZNF705G	-4.061	0.185127	0.404564	2.03434	9.19967	5.81428	2.33802	0	1.68995
FAM66B:9	ZNF705G	-3.22322	0.322564	0.565021	7.58255	0	5.81428	2.33802	0	1.68995
FAM66C:5	ZNF705A	-98.8431	0.0643743	0.226335	0	5.25695	0	0	0	0
FAM66C:7	ZNF705A	1.20222	0.852153	0.941817	15.8124	0	25.8874	37.1486	0	12.6746
FAM95A:3	TEKT4	-1	1	1	0	0	0	0	0	0
FAM95B1:17	RP11-146D12.2	-119.703	0.0716487	0.237584	0	0	6.36802	0	0	0
FAM95B1:6	RP11-146D12.2	-1.43535	0.728366	0.881808	5.73315	1.46027	1.24592	1.81846	0	4.22487
FAM99A:2	KRTAP5-6	-31.1425	0.0849183	0.260362	1.57199	0	0	0	0	0
FAM99B:2	KRTAP5-6	-2.27591	0.457638	0.687117	11.6512	4.52682	4.98366	7.27385	0	1.68995
FGD5-AS1:1	FGD5	3.70588	0.205565	0.42983	11.6512	3.94272	8.30611	58.9702	0	29.5741
FGD5-AS1:7	FGD5	1.99178	0.677989	0.852428	0	7.59338	0	6.49451	8.57315	0
FGF14-AS2:1	FGF14	102.984	0.00528774	0.0638277	0	0	0	3.63693	0	1.68995
FOXD2-AS1:2	FOXD2	-69.1495	0.0480964	0.19506	1.29458	0	2.3534	0	0	0
FOXD3-AS1:6	FOXD3	-1.59116	0.747497	0.88889	3.14398	0	0.969046	2.33802	0	0
FOXN3-AS1:1	FOXN3	42.3383	2.5134e-05	0.00319296	1.66446	0	1.66122	94.0405	17.7587	32.109
FRMD6-AS1:1	FRMD6	-2.009	0.361842	0.598008	21.7305	2.62848	8.58298	10.9108	0	5.06984
FRY-AS1:2	FRY	-6.38623	0.0242798	0.13749	20.6208	10.806	9.69046	1.81846	3.67421	0.844973
FTX:3	ZCCHC13	-5.30521	0.0733954	0.239562	8.32231	8.32351	8.85985	2.85759	0	1.68995
FZD10-AS1:1	FZD10	12.3117	0.00822166	0.0814203	10.2642	0.730133	0	64.1658	11.0226	61.683
FZD10-AS1:13	FZD10	1.52472	0.619468	0.813989	11.1889	2.48245	3.73775	9.09232	0	17.7444
FZD10-AS1:2	FZD10	1.3183	0.829266	0.929766	0.647291	1.31424	0.830611	3.37715	0	0
GABPB1-AS1:1	GABPB1	-1.93102	0.629563	0.820906	2.95904	0	4.15305	3.37715	0	0
GAS5:18	DARS2	-2.32393	0.598055	0.797999	2.40422	3.06656	0	0	0	2.53492
GAS5:2	DARS2	-8.04245	0.0172113	0.115653	18.9564	12.8503	2.21496	1.81846	0.612368	1.68995
GAS5:39	DARS2	-169.392	0.0046123	0.0588156	2.68163	2.1904	4.15305	0	0	0
GATA2-AS1:1	GATA2	1.77848	0.48756	0.7124	12.7609	8.32351	1.93809	23.1205	0	17.7444
GATA3-AS1:11	GATA3	1.20645	0.822574	0.925069	11.3738	4.52682	2.90714	13.2488	0	9.2947
GATA3-AS1:9	GATA3	1.11642	0.953046	0.984332	0	0	4.56836	4.93583	0	0
GATA6-AS1:1	GATA6	2.12027	0.57872	0.785114	1.38705	0	0	0	0	3.37989
GATA6-AS1:4	GATA6	-69.874	0.0581455	0.213931	2.21928	1.46027	0	0	0	0
GCC2-AS1:1	GCC2	1.52894	0.807091	0.919551	0	0.43808	0	0	0	0.844973
GLIDR:16	ANKRD20A2	-41.5107	0.0884233	0.266759	0	2.1904	0	0	0	0
GLIS2-AS1:3	GLIS2	-51.3424	0.142483	0.347334	2.68163	0	0	0	0	0
GNAS-AS1:10	GNAS	-1.88217	0.588052	0.791786	3.42139	1.31424	2.3534	3.37715	0	0
GNAS-AS1:13	GNAS	-37.5521	0.161343	0.37152	1.94187	0	0	0	0	0
GNAS-AS1:4	GNAS	1.69027	0.74656	0.888701	2.40422	0.292053	0	4.41627	0	0
GPR50-AS1:1	GPR50	-1.02944	0.974592	0.992986	4.80845	2.92053	2.7687	8.0532	0	1.68995
H19:14	MRPL23	-2.46028	0.394367	0.630705	17.0145	12.7043	10.1058	0	3.06184	13.5196
H19:16	MRPL23	4.17854	0.250893	0.483891	0	3.21258	1.10748	1.55868	14.0845	2.53492
H19:17	MRPL23	-1.20471	0.853329	0.942122	1.57199	4.9649	22.4265	0	23.27	0.844973
H19:7	MRPL23	-223.995	0.00454375	0.0584868	7.76749	0	4.15305	0	0	0
H1FX-AS1:1	H1FX	24.2062	0.000567796	0.0204478	1.29458	1.31424	0.830611	53.7746	4.28657	26.1942
H1FX-AS1:3	H1FX	-3.11138	0.200901	0.424965	3.88374	2.33642	20.6268	2.85759	0	5.91481
HAGLR:14	HOXD3	-1.01423	0.990594	1	12.8533	0	3.73775	3.89671	0	12.6746
HAGLR:29	HOXD3	-230.478	0.0207517	0.128067	0	10.5139	1.79966	0	0	0
HAGLROS:3	HOXD3	10.3753	0.0792857	0.250978	5.73315	0	0	21.0422	0.612368	38.8688
HAGLROS:6	HOXD3	-1.65311	0.76243	0.897925	2.49669	0	0	0	0	1.68995
HAND2-AS1:41	HAND2	1.8041	0.660726	0.841594	2.86657	0	0.553741	4.41627	0	1.68995
HAND2-AS1:44	HAND2	-42.0202	0.0973938	0.281266	0.739761	1.46027	0	0	0	0
HAR1A:1	YTHDF1	7.69032	0.00349745	0.0518686	6.28797	5.11093	3.32244	73.5179	9.18552	30.419
HAR1A:2	YTHDF1	9.36363	0.0154323	0.110498	15.35	8.03146	0	121.837	7.34841	90.4121
HAS2-AS1:2	HAS2	5.53697	0.0707325	0.236059	4.06868	0.876159	0.415305	10.9108	0	19.4344
HCG21:1	DPCR1	-3.7774	0.130266	0.329482	16.5521	12.7043	21.4574	1.2989	0	12.6746
HCG4B:1	HLA-A	-4.05855	0.382662	0.618896	0	5.11093	0	1.03912	0	0
HCP5:2	MICA	1.77135	0.570604	0.779285	4.80845	2.04437	1.93809	0	11.635	4.22487
HDAC11-AS1:2	HDAC11	-8.24008	0.331519	0.574991	0.36988	0	0	0	0	0
HEIH:6	MGAT1	1.11568	0.931519	0.976022	7.95243	0	0	8.57276	0	0
HHIP-AS1:2	HHIP	22.1711	0.00192367	0.037006	6.65785	0	1.24592	93.7808	10.4103	73.5127
HLA-F-AS1:1	HLA	-8.01082	0.121683	0.317066	1.75693	0.146027	1.52279	0.259781	0	0
HMGN3-AS1:2	HMGN3	94.5588	0.00260768	0.0434591	0	0	0	3.89671	0	0.844973
HNF1A-AS1:6	HNF1A	-7.63574	0.211228	0.436424	2.03434	2.33642	0.27687	0	0.612368	0
HNF1A-AS1:7	HNF1A	-3.7847	0.095976	0.27938	18.3091	17.3772	8.02924	3.37715	0	8.44973
HNF4A-AS1:6	HNF4A	-62.3146	0.0452649	0.188594	2.95904	0.292053	0	0	0	0
HORMAD2-AS1:2	HORMAD2	3.3323	0.295182	0.535559	0.739761	1.16821	0.830611	4.93583	0	4.22487
HOTAIRM1:3	HOXA2	2.40266	0.601223	0.799944	0	0	2.7687	6.49451	0	0
HOTAIRM1:6	HOXA2	-35.9047	0.139087	0.341654	1.8494	0	0	0	0	0
HOTTIP:8	HOXA13	-1.14632	0.902251	0.963328	6.10303	4.23477	0	8.57276	0	0
HOXA-AS3:1	HOXA	4.56261	0.280873	0.519455	1.01717	0	0	4.67605	0	0
HOXA-AS3:7	HOXA	-2.84518	0.358292	0.595502	5.54821	0	3.73775	2.85759	0	0
HOXA10-AS:2	HOXA10	3.60759	0.151683	0.358847	11.1889	10.806	5.95271	52.7354	0	48.1635
HOXA10-AS:7	HOXA10	-1.43352	0.73634	0.883162	7.95243	2.62848	0	4.67605	0	2.53492
HOXC-AS1:1	HOXC	-1.81253	0.631979	0.822729	1.47952	0.730133	0.27687	0	0	1.68995
HOXC-AS3:4	HOXC	-1.35624	0.824892	0.927211	5.73315	2.7745	0	5.97495	0	0
HOXC13-AS:1	HOXC13	2.13305	0.560033	0.772052	2.86657	0	0	3.63693	0	2.53492
HOXD-AS2:2	HOXD	6.69944	0.299532	0.539527	1.29458	0	0	0	0	9.2947
HOXD-AS2:3	HOXD	8.29486	0.0302277	0.152949	2.95904	6.57119	1.52279	49.6181	0	42.2487
HPN-AS1:2	HPN	1.14616	0.911501	0.968553	5.2708	0	1.79966	4.67605	0	3.37989
HYMAI:7	PLAGL1	-1.91117	0.59076	0.791874	0.832231	16.647	1.24592	0	0	10.1397
IDH1-AS1:3	IDH1	1.98691	0.555439	0.768726	1.10964	0.584106	4.70679	5.19561	0	7.60476
IGFBP7-AS1:1	IGFBP7	4.67352	0.24948	0.482674	1.29458	0	0.553741	6.23473	0	2.53492
IL10RB-AS1:3	IL10RB	1.26737	0.852982	0.942114	1.66446	0.292053	7.61393	4.67605	7.34841	0
INE2:1	CA5B	1.2932	0.82145	0.924298	4.71598	1.46027	1.52279	0.259781	0	10.1397
INTS6-AS1:10	INTS6	54.6507	0.00509222	0.0624205	1.57199	0	0	55.3333	8.57315	27.0391
INTS6-AS1:6	INTS6	7.44795	0.0186717	0.121937	0.739761	4.23477	5.53741	60.7886	13.4721	3.37989
IPO9-AS1:1	IPO9	6.11698	0.0505232	0.199281	5.54821	0	4.15305	34.8106	3.67421	21.1243
IQCH-AS1:5	IQCH	2.56732	0.459492	0.688573	3.51386	0	0.969046	4.93583	0	6.75978
ITFG1-AS1:1	ITFG1	18.7822	0.0249982	0.139563	4.25362	0.584106	0	60.2691	0	32.109
ITFG1-AS1:4	ITFG1	-152.943	0.00836866	0.0814207	0.924701	3.35861	3.87618	0	0	0
ITGA9-AS1:20	ITGA9	-1.70859	0.595757	0.795407	7.95243	1.89834	1.24592	5.97495	0	0
ITGA9-AS1:6	ITGA9	-6.76675	0.013395	0.10237	34.3064	17.9613	38.2081	6.49451	0	6.75978
JARID2-AS1:1	JARID2	4.78671	0.367675	0.603142	1.8494	0	0	5.71517	0	3.37989
JHDM1D-AS1:1	JHDM1D	2.61843	0.230035	0.458139	7.58255	2.33642	22.8418	74.2972	7.34841	3.37989
JPX:18	CHIC1	-67.5839	0.0456865	0.189376	1.75693	0	1.79966	0	0	0
JPX:20	CHIC1	-2.34313	0.280239	0.51865	12.5759	15.6248	7.61393	4.67605	7.96078	2.53492
JPX:22	CHIC1	-2.91262	0.481698	0.707675	0.832231	2.04437	0	0.779342	0	0
KANSL1-AS1:4	KANSL1	-10.1619	0.206606	0.430807	7.49008	0	0	0	0	0.844973
KCNJ2-AS1:1	KCNJ2	3.02242	0.353075	0.592831	3.32892	1.31424	0	12.989	0	0.844973
KCNQ1DN:1	CDKN1C	-72.1758	0.0550787	0.206391	2.7741	1.02219	0	0	0	0
KCNQ1OT1:2	KCNQ1	-3.74106	0.0310372	0.154795	101.44	97.5457	58.1428	35.5899	28.1689	4.22487
KCNQ1OT1:5	KCNQ1	-1.84037	0.514046	0.734963	0.36988	27.453	76.9699	5.97495	30.006	21.1243
KCTD21-AS1:9	KCTD21	-1.45611	0.819715	0.92386	1.75693	0.43808	0	0	0	1.68995
KDM4A-AS1:1	KDM4A	-190.683	0.0139057	0.104262	7.39761	2.1904	0.553741	0	0	0
KIF9-AS1:1	KIF9	5.16824	0.145417	0.351687	8.50725	1.31424	0	41.5649	0	9.2947
KIF9-AS1:3	KIF9	-8.41711	0.170218	0.383559	0.832231	0	7.61393	0.779342	0	0
KIF9-AS1:9	KIF9	-363.976	0.00175595	0.0357767	7.95243	8.03146	3.46088	0	0	0
KIRREL3-AS3:2	KIRREL3	-3.54804	0.415844	0.652423	4.43856	0	0	1.03912	0	0
KIZ-AS1:4	KIZ	1.63263	0.72249	0.879061	0.832231	1.89834	0.415305	2.59781	0	2.53492
KLF3-AS1:6	KLF3	10.1465	0.0218148	0.131494	2.21928	2.92053	0.553741	50.1376	0	7.60476
KRTAP5-AS1:1	KRTAP5	8.15173	0.213482	0.439698	0.18494	0	0	1.81846	0	0
LACTB2-AS1:5	LACTB2	-329.025	0.00417623	0.0563414	1.10964	0.146027	16.3353	0	0	0
LAMP5-AS1:1	LAMP5	-1.36637	0.780904	0.908716	1.8494	0.146027	4.98366	4.67605	0	0
LAMTOR5-AS1:5	LAMTOR5	-1.16173	0.916507	0.970751	2.12681	2.48245	0	0	0	4.22487
LARS2-AS1:2	LARS2	-3.2503	0.278213	0.515821	2.86657	0.584106	12.8745	3.11737	0	1.68995
LBX1-AS1:1	LBX1	1.8468	0.605302	0.802896	2.40422	0	1.52279	3.89671	0	3.37989
LBX1-AS1:8	LBX1	-2.08886	0.472465	0.700068	12.6684	2.62848	8.58298	7.01407	0	4.22487
LBX2-AS1:3	LBX2	1.33292	0.856012	0.943449	0	3.65066	0	0	4.89894	0
LBX2-AS1:5	LBX2	-123.955	0.0535863	0.204279	6.56538	0	0	0	0	0
LEF1-AS1:3	LEF1	-104.292	0.0392063	0.174934	4.34609	1.16821	0	0	0	0
LEF1-AS1:4	LEF1	2.90667	0.307227	0.547238	4.90092	6.27914	0	18.964	0	13.5196
LEF1-AS1:7	LEF1	-62.8856	0.0915728	0.271221	1.8494	1.46027	0	0	0	0
LENG8-AS1:4	LENG8	-3.18789	0.135752	0.337276	41.889	14.7487	18.5503	3.11737	4.89894	16.0545
LGALS8-AS1:3	LGALS8	-2.33014	0.366879	0.602906	12.5759	2.7745	4.29149	7.79342	0	0
LHFPL3-AS1:10	LHFPL3	-7.44748	0.0825907	0.257446	4.71598	7.59338	10.2442	1.2989	0	1.68995
LIFR-AS1:3	LIFR	2.91971	0.25624	0.490347	3.51386	5.54901	4.01462	28.5759	0	9.2947
LIMD1-AS1:2	LIMD1	4.9868	0.196592	0.419791	0.0924701	2.62848	1.10748	0.259781	18.9834	0
LIN28B-AS1:1	LIN28B	10.8995	0.112536	0.305	2.12681	0	0	12.2097	0	11.8296
LINC-PINT:1	MKLN1	1.4559	0.771658	0.903893	1.47952	0	0.27687	2.33802	0	0
LINC-PINT:18	MKLN1	8.34653	0.0269612	0.144761	4.34609	3.35861	0.553741	52.9952	0	16.0545
LINC00092:4	ERCC6L2	1.11273	0.941854	0.978182	5.08586	0	0	3.11737	0	2.53492
LINC00092:6	ERCC6L2	7.03209	0.0717053	0.237584	3.32892	0	2.21496	29.8748	0	9.2947
LINC00152:8	PLGLB2	-4.95453	0.204184	0.42801	3.05151	3.94272	11.0748	0	3.67421	0
LINC00173:6	MAP1LC3B2	-7.65056	0.0831795	0.258325	4.06868	8.46954	9.55202	1.81846	0	0.844973
LINC00174:6	TPST1	2.80499	0.101238	0.287125	111.334	62.0613	80.8461	493.063	29.3937	190.119
LINC00205:1	POFUT2	3.62704	0.464884	0.693397	0	3.35861	0	9.61188	0	2.53492
LINC00205:5	POFUT2	-224.028	0.0370949	0.169444	11.9286	0	0	0	0	0
LINC00261:1	FOXA2	3.02598	0.451031	0.681354	3.14398	0	0	6.23473	0	3.37989
LINC00266-3:5	DUSP22	-97.47	0.0360255	0.166532	0	3.94272	1.24592	0	0	0
LINC00271:2	AHI1	3.78292	0.455628	0.685575	1.01717	0	0	2.33802	0	1.68995
LINC00273:1	CTD-2144E22.5	4.25733	0.00844006	0.0815829	184593	358423	391728	495971	1.84448e+06	1.63906e+06
LINC00294:2	TCP11L1	-6.49717	0.002863	0.0459369	65.9312	48.9189	40.0078	10.1314	1.8371	11.8296
LINC00304:2	ACSF3	-2.68907	0.422846	0.658881	5.08586	0	0.830611	0	0	2.53492
LINC00304:5	ACSF3	-32.2628	0.144242	0.349849	1.10964	0	0.553741	0	0	0
LINC00311:1	CTC-786C10.1	-3.08414	0.242606	0.473809	1.47952	1.16821	16.7507	2.85759	0	3.37989
LINC00311:2	CTC-786C10.1	-7.58582	0.147063	0.353962	7.02773	0.730133	0	0.779342	0	0
LINC00313:10	SIK1	1.91478	0.60706	0.804187	0.462351	3.50464	0	4.93583	0	2.53492
LINC00313:27	SIK1	-5.1981	0.334826	0.578196	2.03434	0	0	0.259781	0	0
LINC00339:4	CELA3A	-6.74475	0.146056	0.352598	2.12681	3.94272	0.969046	0.779342	0	0
LINC00342:3	ANKRD36C	-6.66187	0.060014	0.217485	3.51386	10.952	17.9966	0.259781	0	5.06984
LINC00346:2	LINC00346	-4.95743	0.269836	0.50678	1.8494	1.46027	0	0	0	0.844973
LINC00384:1	KATNAL1	-9.39106	0.161712	0.37205	4.53103	2.04437	0	0	0	0.844973
LINC00402:2	AL355390.1	-2.22866	0.49316	0.717039	2.58916	1.89834	2.21496	1.2989	0	1.68995
LINC00428:1	EPSTI1	-1.8161	0.688662	0.858183	1.01717	0.146027	1.52279	0	0	1.68995
LINC00428:4	EPSTI1	1.06462	0.96714	0.990079	0	0	1.10748	0	1.22474	0
LINC00441:2	RB1	1.59311	0.741251	0.885559	1.57199	0	0	2.33802	0	0
LINC00449:1	TM9SF2	-10.3958	0.0554195	0.207185	3.88374	1.89834	8.58298	0	0	1.68995
LINC00449:8	TM9SF2	-3.83721	0.213279	0.439414	11.7437	19.8596	12.8745	0	6.73605	5.06984
LINC00449:9	TM9SF2	53.1855	0.0300506	0.152472	0	0	0	2.59781	0	0
LINC00461:3	MEF2C	3.30474	0.116545	0.309603	3.60633	2.92053	4.29149	25.4585	3.06184	6.75978
LINC00472:1	OGFRL1	17.8751	0.00126631	0.0304503	9.24701	7.44735	0	183.665	15.3092	100.552
LINC00475:1	SPTLC1	8.48436	0.0132025	0.101707	9.61689	4.81887	7.33706	83.9091	0	101.397
LINC00475:9	SPTLC1	-1.92959	0.735358	0.883162	1.75693	0	0	0.779342	0	0
LINC00476:3	DKFZP434H0512	-1.61417	0.585905	0.790877	3.97621	5.25695	6.22958	0.779342	2.44947	6.75978
LINC00476:7	DKFZP434H0512	-7.28188	0.0797264	0.251427	4.16115	4.23477	1.66122	1.03912	0	0
LINC00477:1	BCAT1	2.12837	0.581559	0.786904	0.18494	0.730133	0.415305	2.59781	0	0
LINC00485:2	PAH	-1.71628	0.514147	0.734963	12.2061	7.59338	13.7051	4.67605	0	15.2095
LINC00504:8	CPEB2	-7.84088	0.118833	0.312908	3.42139	4.67285	6.09115	0	1.8371	0
LINC00507:10	TMEM132C	-1.21052	0.864943	0.946913	1.38705	11.9742	3.87618	0.779342	13.4721	0
LINC00574:2	ERMARD	-134.356	0.0429778	0.184022	7.1202	0	0	0	0	0
LINC00574:4	ERMARD	1.06619	0.966335	0.989611	0	5.40298	0	0.259781	5.51131	0
LINC00599:1	TNKS	1.86206	0.710354	0.872895	0.739761	0	0	1.2989	0	0
LINC00599:2	TNKS	9.69552	0.0932263	0.274701	1.8494	0	0	13.5086	0	5.06984
LINC00599:4	TNKS	7.70328	0.161744	0.37205	0.36988	0	0	3.11737	0	0
LINC00605:3	TNFAIP2	-1.50594	0.806063	0.919551	6.56538	0	0	4.15649	0	0
LINC00607:1	MREG	-1.8558	0.431111	0.663857	13.963	5.84106	1.52279	4.41627	1.22474	5.91481
LINC00607:3	MREG	-1.50753	0.814601	0.922576	1.10964	2.48245	0	0	0	2.53492
LINC00620:3	FBLN2	1.12584	0.955585	0.985609	2.12681	0	0	0	0	2.53492
LINC00623:10	NBPF8	2.24748	0.432887	0.665602	4.62351	3.06656	1.10748	16.1064	0	3.37989
LINC00623:17	NBPF8	-114.549	0.0838928	0.258698	0	0	6.09115	0	0	0
LINC00636:2	BBX	5.86282	0.180631	0.397577	1.47952	0.146027	0	9.61188	0	0
LINC00638:1	ZBTB42	-53.5425	0.061149	0.219361	0.739761	0	2.07653	0	0	0
LINC00649:5	ATP5O	-4.31177	0.220556	0.446753	5.73315	5.54901	23.6724	0.779342	0	7.60476
LINC00649:6	ATP5O	-90.7752	0.0485905	0.195738	1.47952	0.146027	3.18401	0	0	0
LINC00649:7	ATP5O	1.27036	0.693397	0.860176	73.6987	30.0815	19.2425	79.2331	11.0226	65.9079
LINC00658:3	PROKR2	-3.40473	0.262751	0.498619	7.21267	1.46027	0.138435	1.55868	0	0.844973
LINC00662:35	UQCRFS1	-3.47211	0.0674604	0.230097	18.0317	43.2238	36.5469	10.3912	14.0845	3.37989
LINC00663:1	ZNF506	-1.09931	0.939389	0.977878	0.554821	0	4.98366	0.259781	0	5.06984
LINC00664:8	CTD-2561J22.3	-15.3833	0.0352858	0.164643	3.97621	3.21258	2.63027	0	0	0.844973
LINC00667:14	C18orf42	-64.4968	0.091488	0.271122	0	1.75232	1.66122	0	0	0
LINC00667:6	C18orf42	5.11664	0.248161	0.481102	3.32892	0	0	12.2097	0	5.06984
LINC00668:8	ARHGAP28	-11.4561	0.260217	0.495486	0	4.3808	0	0.259781	0	0
LINC00668:9	ARHGAP28	-8.02287	0.129268	0.328338	3.6988	0	1.52279	0	0	0.844973
LINC00672:3	LASP1	-6.29292	0.118756	0.312872	5.82562	3.79669	16.0585	3.63693	0	0
LINC00674:15	KPNA2	-1.4261	0.686321	0.857063	5.91809	20.8818	10.1058	2.59781	23.27	0
LINC00674:21	KPNA2	-230.254	0.0071941	0.0758026	1.10964	2.1904	8.99828	0	0	0
LINC00680:16	PRIM2	-5.24312	0.419968	0.656505	1.10964	2.92053	0	0	0	0.844973
LINC00682:6	TMEM33	6.0431	0.0894913	0.268194	4.16115	0	13.4282	60.7886	0	45.6285
LINC00683:3	LINC00908	-10.5275	0.0188693	0.122123	9.8943	16.0629	21.5959	0	0	5.06984
LINC00683:4	LINC00908	-71.1304	0.0756394	0.24363	2.86657	0.876159	0	0	0	0
LINC00687:1	BTBD3	-1.2056	0.874893	0.950935	1.47952	0.292053	0.830611	0	0	2.53492
LINC00689:8	VIPR2	-1.14177	0.915301	0.970158	4.53103	0	0.969046	1.55868	0	3.37989
LINC00824:5	TMEM75	1.73791	0.478946	0.705591	30.6076	5.25695	7.06019	35.8497	0	38.8688
LINC00824:8	TMEM75	-10.4753	0.096592	0.280204	12.2985	0.730133	2.21496	0	0	1.68995
LINC00839:9	ZNF33B	-3.19013	0.461799	0.690372	0	0.730133	6.78332	0	0	2.53492
LINC00842:4	NPY4R	-19.9932	0.101642	0.287787	2.21928	0	12.4592	0	0	0.844973
LINC00842:5	NPY4R	-2.39848	0.239649	0.469739	8.69219	24.6785	18.8272	1.03912	11.0226	10.1397
LINC00863:3	NUTM2D	178.115	0.00150578	0.0331175	0	0	0	4.41627	0	5.06984
LINC00863:4	NUTM2D	-1.20693	0.839515	0.935307	3.32892	9.63775	6.36802	15.3271	0	0
LINC00865:6	KIF20B	-3.23597	0.512641	0.734074	3.05151	0	0	0.779342	0	0
LINC00865:7	KIF20B	-271.437	0.0113126	0.0952098	2.86657	0	11.6286	0	0	0
LINC00869:48	PPIAL4C	-1.36163	0.716259	0.875962	17.8467	6.86325	2.90714	17.1455	0	2.53492
LINC00882:1	CCDC54	2.76552	0.542354	0.75871	0.0924701	1.46027	0	3.37715	0	0.844973
LINC00884:1	ATP13A3	1.77235	0.59989	0.799034	1.29458	0	3.59931	5.19561	0	3.37989
LINC00885:1	ZDHHC19	-37.6377	0.133037	0.333587	1.94187	0	0	0	0	0
LINC00886:1	LEKR1	33.1813	0.00781874	0.0784994	0	1.31424	0	26.4976	0	17.7444
LINC00887:2	CPN2	-9.8382	0.00204858	0.0381373	78.877	79.0003	91.6441	18.7042	0	5.91481
LINC00887:4	CPN2	-2.03725	0.446146	0.677623	88.124	21.3199	21.1806	0.519561	0	64.218
LINC00887:7	CPN2	-78.7339	0.0775966	0.247719	2.21928	0	1.93809	0	0	0
LINC00890:5	DCX	-1.32473	0.664486	0.843518	12.391	26.5768	26.3027	4.93583	24.4947	20.2794
LINC00890:6	DCX	2.82273	0.323096	0.565284	0	3.79669	1.24592	1.55868	6.12368	6.75978
LINC00893:1	IDS	-41.5974	0.112764	0.305321	0	2.1904	0	0	0	0
LINC00894:1	CXorf40B	1.6599	0.649296	0.833239	1.66446	0.584106	0.138435	3.63693	0	0
LINC00899:1	C22orf26	34.3534	0.00047751	0.0188016	0.462351	4.67285	0.138435	106.77	6.12368	68.4428
LINC00900:3	CADM1	280.412	0.000798185	0.0245396	0	0	0	4.93583	0	10.1397
LINC00900:7	CADM1	8.08795	0.152627	0.360696	0	3.35861	0.553741	12.4695	0	19.4344
LINC00909:1	ZNF407	-152.343	0.0110198	0.0936185	1.20211	2.62848	4.29149	0	0	0
LINC00910:1	ARL4D	-4.10402	0.117422	0.311017	6.28797	2.92053	1.52279	2.07824	0	0
LINC00917:10	FOXF1	-8.60649	0.321694	0.564372	0	6.71722	0	0	0	0.844973
LINC00923:6	LINC00923	-2.90373	0.364473	0.600618	5.64068	10.806	0	1.55868	0	4.22487
LINC00926:18	TCF12	-3.21285	0.4141	0.650746	0	3.35861	1.66122	1.2989	0	0
LINC00926:19	TCF12	-148.07	0.0275887	0.146149	0.27741	0	7.61393	0	0	0
LINC00926:2	TCF12	-5.85832	0.339641	0.580749	0	0	7.19863	1.03912	0	0
LINC00926:5	TCF12	-2.46553	0.343516	0.58364	16.7371	12.2662	13.2898	0	0	17.7444
LINC00930:1	FAM174B	-2.8795	0.296378	0.536573	9.8943	5.54901	9.82889	0	0	9.2947
LINC00936:1	ATP2B1	872.207	3.41339e-05	0.00396247	0	0	0	29.615	15.9216	0.844973
LINC00936:2	ATP2B1	-249.758	0.000554157	0.0203828	6.47291	3.65066	3.18401	0	0	0
LINC00937:4	CLEC6A	3.25	0.295375	0.535622	4.25362	0.584106	0	7.01407	7.96078	0.844973
LINC00937:8	CLEC6A	-36.7208	0.0835587	0.258455	0.462351	1.46027	0	0	0	0
LINC00938:3	ARID2	-3.96304	0.234594	0.46432	10.1717	11.8281	10.7979	7.79342	0	0
LINC00939:8	TMEM132B	-4.17502	0.323052	0.565284	1.10964	1.46027	3.59931	0	0	1.68995
LINC00941:3	CAPRIN2	-250.753	0.00878232	0.0838742	8.69219	4.67285	0	0	0	0
LINC00943:2	TMEM132B	4.57811	0.226585	0.454182	1.75693	0	0	5.71517	0	2.53492
LINC00957:5	DBNL	2.90427	0.0636346	0.224555	20.1585	12.1202	12.0439	72.4788	22.0452	33.7989
LINC00958:1	TEAD1	1.47941	0.728866	0.881985	1.8494	0.876159	0.138435	3.89671	0	0
LINC00958:3	TEAD1	-2.83621	0.365375	0.601631	0.0924701	4.08874	14.5357	3.89671	0	2.53492
LINC00959:1	GLRX3	1.07158	0.936254	0.976852	4.06868	6.42517	0.969046	5.71517	0.612368	5.91481
LINC00963:14	NTMT1	-1.87612	0.586125	0.791016	1.8494	3.50464	0.27687	0	0	3.37989
LINC00963:3	NTMT1	7.50447	0.116803	0.309799	1.20211	0	1.66122	17.4053	0	4.22487
LINC00963:4	NTMT1	9.29706	0.140767	0.344399	0.0924701	0	0.27687	2.85759	0	0.844973
LINC00963:5	NTMT1	-99.87	0.0501717	0.198726	5.2708	0	0	0	0	0
LINC00970:1	ATP1B1	-4.25126	0.121731	0.317066	19.4187	16.647	4.84523	1.55868	0	8.44973
LINC00982:1	PRDM16	-1.50493	0.607131	0.804187	24.0422	3.35861	10.1058	12.2097	0	12.6746
LINC00987:1	PZP	1.39137	0.586978	0.791294	12.2985	16.355	11.9054	13.7684	27.5565	15.2095
LINC00987:2	PZP	1.39137	0.586938	0.791294	12.2985	16.355	11.9054	13.7684	27.5565	15.2095
LINC00989:1	GK2	-2.6974	0.356139	0.59426	0	32.856	24.9183	3.11737	0	18.5894
LINC00989:2	GK2	-462.907	0.00363729	0.0523287	9.70936	15.0407	0	0	0	0
LINC01000:1	FAM71F2	-1.60949	0.729804	0.882345	4.25362	0	3.18401	2.07824	0	2.53492
LINC01000:11	FAM71F2	-3.07647	0.203408	0.426783	104.584	21.0278	1.93809	25.9781	0	15.2095
LINC01000:2	FAM71F2	125.908	0.00772494	0.0784861	0	0	0	0	6.73605	0
LINC01003:1	KMT2C	6.67729	0.167422	0.379931	1.8494	2.04437	0	25.9781	0	0
LINC01003:2	KMT2C	4.82468	0.0975683	0.28146	11.6512	1.60629	15.7816	96.1188	0	43.9386
LINC01018:7	NSUN2	1.44815	0.807753	0.919551	4.53103	1.16821	0	8.0532	0	0
LINC01023:4	FER	-65.5703	0.048522	0.195628	0	3.06656	0.415305	0	0	0
LINC01057:1	F3	1.79292	0.623871	0.817271	5.64068	0	0.138435	5.19561	4.28657	0.844973
LINC01081:1	FOXF1	-20.5146	0.16217	0.372659	1.01717	0	0	0	0	0
LINC01088:12	NAA11	-2.40699	0.292608	0.532036	8.32231	3.65066	2.3534	3.89671	0	1.68995
LINC01089:1	TMEM120B	-1.04442	0.974542	0.992986	1.47952	0	0.830611	1.2989	0	0.844973
LINC01089:15	TMEM120B	1.80515	0.648825	0.832896	1.01717	0	1.24592	1.03912	3.06184	0
LINC01089:2	TMEM120B	-1.14736	0.916917	0.970845	11.0964	0	0	8.57276	0	0.844973
LINC01089:21	TMEM120B	51.4379	0.000925813	0.0265255	0.924701	0	0.138435	39.2269	2.44947	17.7444
LINC01089:28	TMEM120B	-1.57255	0.632774	0.823033	1.75693	2.33642	2.07653	3.37715	0	0
LINC01089:31	TMEM120B	2.43404	0.500978	0.723838	3.6988	0	0	8.83254	0	0
LINC01089:6	TMEM120B	-174.91	0.0346395	0.163096	1.29458	0	8.02924	0	0	0
LINC01091:1	SPRY1	-2.42567	0.418822	0.655493	1.75693	3.21258	5.81428	0.519561	0	4.22487
LINC01096:1	NKX3-2	5.02889	0.146344	0.353039	4.71598	1.02219	1.79966	17.1455	0	21.1243
LINC01096:2	NKX3-2	2.69427	0.213058	0.439144	4.53103	10.2219	4.70679	27.0172	0	25.3492
LINC01097:1	NKX3-2	3.38761	0.149601	0.357692	5.45574	1.02219	1.10748	16.626	0.612368	8.44973
LINC01106:5	LIMS3	-1.61695	0.590319	0.791786	6.01056	4.81887	4.15305	8.57276	0	0
LINC01116:1	MTX2	2.60221	0.359703	0.596634	4.71598	0	3.04557	8.57276	0	11.8296
LINC01116:7	MTX2	-2.24443	0.381938	0.618467	8.78466	4.3808	2.63027	2.85759	0	4.22487
LINC01117:3	MTX2	-102.628	0.0341824	0.162599	1.29458	0	4.15305	0	0	0
LINC01121:6	SIX2	-2.15697	0.501838	0.724615	4.80845	6.13311	19.7962	0.259781	0	14.3645
LINC01122:3	FANCL	-1.15617	0.886874	0.956943	2.7741	1.75232	15.0894	14.0281	2.44947	0
LINC01123:2	LIMS3	-1.32824	0.78969	0.912161	0.739761	1.46027	1.10748	2.07824	0	0
LINC01124:8	LINC01124	1.17346	0.855962	0.943449	4.62351	0.584106	5.39897	5.71517	0	6.75978
LINC01135:1	JUN	1.61451	0.626901	0.81912	1.29458	1.75232	2.7687	8.83254	0	0
LINC01135:8	JUN	-58.5783	0.0942079	0.276384	2.7741	0.292053	0	0	0	0
LINC01137:1	ZC3H12A	3.77252	0.312423	0.552982	3.6988	0	4.29149	19.2238	0	10.9846
LINC01138:1	PPIAL4A	1.18487	0.900151	0.96281	1.38705	0	0.553741	2.07824	0	0
LINC01138:3	PPIAL4A	3.24613	0.20126	0.425192	2.12681	4.9649	0.415305	20.5227	0	3.37989
LINC01140:8	HS2ST1	1.66927	0.80797	0.919551	2.21928	0	0	3.63693	0	0
LINC01146:8	GPR65	-5.39194	0.0262013	0.143077	32.6419	30.6656	28.5176	0.779342	1.8371	15.2095
LINC01158:2	POU3F3	-3.4716	0.41812	0.654698	0	0	7.19863	1.81846	0	0
LINC01158:4	POU3F3	-4.2129	0.356065	0.59426	1.57199	8.32351	0	0	0	2.53492
LINC01159:4	POU3F3	-3.23313	0.384134	0.620485	7.67502	0	0	2.07824	0	0
LINC01160:1	RAP1A	-4.45137	0.0596151	0.216868	135.284	40.1573	10.6595	26.2378	0	15.2095
LINC01179:1	TLL1	-5.88737	0.216906	0.443675	3.79127	3.06656	1.79966	0	0	1.68995
LINC01189:1	FAM27D1	-30.6836	0.166912	0.379149	1.57199	0	0	0	0	0
LINC01191:6	ACTR3	-6.73331	0.322611	0.565021	0.27741	0	0	0	0	0
LINC01197:3	MCTP2	5.3356	0.137342	0.339224	5.73315	0.730133	11.767	57.6713	0	39.7137
LINC01209:2	TBL1XR1	-7.37054	0.152324	0.360112	5.54821	4.08874	0	1.03912	0	0
LINC01210:2	SOX14	2.32499	0.528241	0.746332	4.99339	0	0	11.4303	0	0
LINC01233:1	ZNF98	-1.20349	0.889622	0.958678	2.21928	1.60629	0	0.779342	0	2.53492
LINC01235:2	MPDZ	-78.8914	0.028535	0.148704	2.12681	1.89834	0.138435	0	0	0
LINC01237:7	AC131097.4	-304.94	0.00134995	0.0311275	1.8494	3.79669	10.6595	0	0	0
LINC01248:2	SOX11	-2.42407	0.595295	0.795407	4.90092	0	0	1.81846	0	0
LINC01254:1	APCDD1	-29.0332	0.149943	0.357749	1.47952	0	0	0	0	0
LINC01257:1	GPR133	-1.54935	0.623456	0.817237	8.0449	3.50464	1.79966	6.49451	0	1.68995
LINC01272:1	CEBPB	1.13923	0.893601	0.960921	1.75693	3.35861	1.24592	2.33802	0	5.06984
LINC01276:3	FOXP4	18.9115	0.00129751	0.0308698	2.49669	2.62848	2.21496	90.6634	0.612368	48.1635
LINC01285:2	ZCCHC12	-7.16065	0.0511113	0.199964	11.8362	10.5139	4.15305	0	0	4.22487
LINC01285:5	ZCCHC12	-1.0406	0.968974	0.990452	4.71598	0.876159	14.2588	7.53364	0.612368	10.9846
LINC01297:1	POTEM	1.26571	0.861145	0.945958	0	0.876159	0.553741	1.55868	0	0
LINC01297:5	POTEM	-1.63105	0.797152	0.915284	1.47952	0	0	0.779342	0	0
LINC01299:3	ARMC1	1.97058	0.564356	0.775076	1.38705	1.46027	1.10748	2.85759	0	5.06984
LINC01301:1	RAB2A	-1.08488	0.967779	0.990223	3.23645	0	0	2.85759	0	0
LINC01305:1	SP9	-1.60904	0.619264	0.81388	1.01717	2.7745	1.38435	2.07824	0	0.844973
LINC01305:2	SP9	-2.29551	0.309925	0.550878	4.80845	6.86325	3.59931	5.19561	0	0.844973
LINC01311:1	SLC25A1	-1	1	1	0	0	0	0	0	0
LINC01311:3	SLC25A1	2.23805	0.621014	0.815066	4.25362	3.35861	0	16.8857	0	0
LINC01322:6	SLITRK3	3.03623	0.25352	0.486726	3.05151	0.730133	0.553741	9.09232	0.612368	3.37989
LINC01336:3	ANKRD31	-23.2375	0.0341729	0.162599	3.88374	3.65066	2.3534	0.259781	0	0
LINC01351:3	BRINP3	-72.0586	0.115971	0.309384	3.79127	0	0	0	0	0
LINC01355:1	HNRNPR	-2.22301	0.276326	0.514519	16.4597	5.25695	4.70679	4.93583	1.8371	5.06984
LINC01356:1	SLC16A1	-10.9511	0.0105586	0.0922059	12.1136	14.0185	22.4265	0	0	5.06984
LINC01372:1	TYW1	-4.42699	0.0801045	0.252266	227.292	24.9705	14.2588	32.9921	0	27.0391
LINC01376:1	OSR1	-1.40361	0.630025	0.821131	17.8467	13.4344	9.69046	20.0031	1.8371	6.75978
LINC01376:3	OSR1	-2.55902	0.483772	0.708946	9.70936	0	5.1221	5.45539	0	0
LINC01385:1	FOXD1	1.27102	0.825186	0.927281	4.43856	2.33642	4.29149	7.27385	0	6.75978
LINC01400:1	PAX5	-24.1068	0.026175	0.143049	2.31175	3.21258	10.5211	0	0	0.844973
LINC01422:1	CRYBA4	-144.083	0.0156171	0.110999	3.88374	3.35861	0.415305	0	0	0
LINC01424:2	UBE2G2	1.47116	0.808337	0.919658	2.21928	0	0	3.11737	0	0
LINC01441:1	CBLN4	-3.34775	0.219509	0.445973	9.15454	2.7745	7.4755	3.11737	0	2.53492
LINC01447:1	C7orf65	-1.87493	0.373703	0.609431	50.5811	9.19967	25.7489	31.1737	1.22474	12.6746
LINC01471:2	TPRA1	1.15293	0.926488	0.973765	2.40422	0	0	2.59781	0	0
LINC01492:2	CYLC2	-7.9687	0.0793908	0.251075	3.14398	1.75232	6.09115	0.519561	0	0.844973
LINC01503:4	IER5L	1.92894	0.361677	0.598008	8.87713	2.48245	9.27515	22.6009	4.28657	12.6746
LINC01529:2	ARHGAP33	-1.16152	0.925751	0.973765	0	5.69503	0	2.33802	0	2.53492
LINC01535:4	ZNF383	-2.33032	0.455757	0.685575	5.17833	0.584106	1.93809	0	1.8371	1.68995
LINC01535:9	ZNF383	5.09359	0.363886	0.600354	0.739761	0	0	3.89671	0	0
LINC01537:1	PDE2A	-5.49878	0.265721	0.502114	1.94187	0.146027	0.138435	0.259781	0	0
LINC01550:19	C14orf64	-76.0695	0.0219329	0.131852	2.86657	0.292053	0.830611	0	0	0
LINC01560:1	ZNF41	2.40738	0.433827	0.666146	0.554821	2.33642	1.93809	6.49451	0	5.06984
LINC01574:5	UNC5A	3.39559	0.207982	0.432604	2.03434	1.02219	2.07653	12.2097	0	5.06984
LINC01578:11	CHD2	4.11385	0.229678	0.457793	0.18494	2.04437	0	5.71517	0	3.37989
LINC01578:6	CHD2	4.6811	0.237342	0.467714	6.65785	0	4.84523	30.3943	0	23.6592
LINC01578:7	CHD2	33.3704	0.0127577	0.0998249	0	2.1904	0	58.4506	0	15.2095
LINC01578:8	CHD2	-3.91663	0.398211	0.634742	3.23645	3.94272	0	0	1.8371	0
LINC01582:6	ARRDC4	-67.9572	0.0326464	0.159418	2.58916	0	0.969046	0	0	0
LINC01586:1	AEN	-28.9587	0.172115	0.386661	1.47952	0	0	0	0	0
LINC01606:9	IMPAD1	2.04057	0.635796	0.825126	2.86657	0	0.692176	0	0	7.60476
LINC01615:1	THBS2	1.13852	0.939627	0.977878	2.03434	0	0	0	0	2.53492
LINC01619:10	C12orf79	-2.84014	0.376172	0.61178	0.832231	4.81887	8.85985	4.67605	0	0
LINC01624:1	DLL1	-1.59381	0.72265	0.879061	6.47291	0.146027	0	3.11737	0	0.844973
LOH12CR2:1	LOH12CR2	-1.54808	0.661676	0.841935	25.1519	0.146027	14.6741	0	1.8371	24.5042
LOXL1-AS1:16	LOXL1	-1.40695	0.800755	0.916919	1.75693	0	0	1.03912	0	0
LOXL1-AS1:5	LOXL1	-1.69933	0.544557	0.761001	3.60633	4.67285	7.33706	3.37715	0	5.91481
LPP-AS2:1	LPP	3.30752	0.289972	0.528737	3.88374	1.02219	4.01462	16.8857	0	12.6746
LY86-AS1:12	LY86	1.04761	0.972135	0.992176	3.14398	0.43808	0.553741	0	1.22474	3.37989
LYPLAL1-AS1:1	LYPLAL1	-1.56603	0.702218	0.866575	0.18494	9.63775	8.44454	8.0532	0	3.37989
MAFG-AS1:3	MAFG	-7.13002	0.239498	0.46958	10.9115	0	0	0	0	1.68995
MAFG-AS1:4	MAFG	2.1065	0.696478	0.862343	0	0	2.7687	5.71517	0	0
MAFTRR:1	MAF	1.25178	0.836676	0.933957	6.65785	0.146027	0.969046	7.01407	0	2.53492
MALAT1:32	SCYL1	-3.19132	0.348595	0.588981	13.3157	39.2811	0	10.3912	0	5.91481
MCHR2-AS1:2	MCHR2	3.56659	0.338665	0.580627	4.34609	0	0	12.989	0	2.53492
MEG3:47	AL117190.2	-1.54457	0.726616	0.881635	1.57199	0.876159	2.49183	2.85759	0	0
MEIS1-AS3:2	MEIS1	-1.47629	0.638254	0.826198	5.2708	6.57119	19.3809	17.9249	0	2.53492
MESTIT1:1	MEST	-1.02837	0.975833	0.993311	3.42139	2.1904	13.5666	15.5868	0	2.53492
MFI2-AS1:3	MFI2	7.76936	0.0252382	0.140205	12.2985	8.90762	2.49183	141.84	11.0226	31.264
MFI2-AS1:6	MFI2	-33.2164	0.0845915	0.259833	0	1.75232	0	0	0	0
MFI2-AS1:8	MFI2	292.97	2.5343e-07	0.000242124	0	0	0.830611	169.377	55.1131	25.3492
MIR124-2HG:12	BHLHE22	-114.521	0.0190229	0.122123	4.53103	0	1.52279	0	0	0
MIR137HG:1	DPYD	-1.04246	0.981246	0.99604	3.14398	0	0	2.85759	0	0
MIR155HG:2	MRPL39	-13.0194	0.0281928	0.147878	3.14398	1.75232	9.27515	0.779342	0	0
MIR193BHG:1	MKL2	77.0561	0.0242141	0.13749	0	0	0	2.33802	0	1.68995
MIR193BHG:3	MKL2	25.9841	0.00370408	0.0526999	0	1.46027	2.3534	56.3724	0	43.0936
MIR194-2HG:4	EHD1	-7.16066	0.0648894	0.226726	5.54821	7.44735	1.79966	0.519561	0	1.68995
MIR210HG:4	RASSF7	-36.0335	0.112846	0.305321	1.57199	0.146027	0.138435	0	0	0
MIR222HG:1	KRBOX4	1.25694	0.768098	0.901447	23.0251	59.4328	21.319	76.1157	0	54.0783
MIR3663HG:9	VAX1	-12.2385	0.00506105	0.0622963	11.6512	5.84106	7.75237	1.03912	0	0.844973
MIR4432HG:3	BCL11A	-123.208	0.0121004	0.0983252	3.60633	0.292053	2.63027	0	0	0
MIR4435-2HG:10	BCL2L11	-155.832	0.0407752	0.17897	0	0	8.30611	0	0	0
MIR4435-2HG:4	BCL2L11	-6.68047	0.0903282	0.269106	1.8494	14.8947	7.4755	0	3.67421	0
MIR503HG:8	PLAC1	2.59872	0.268919	0.505905	3.51386	12.7043	4.29149	36.8888	0	16.0545
MIR548XHG:3	TMPRSS15	-1	1	1	0	0	0	0	0	0
MIR646HG:1	C20orf197	7.15057	0.175028	0.389326	3.51386	0	0	8.0532	0	17.7444
MIR646HG:4	C20orf197	2.48814	0.485355	0.710655	2.95904	0	0.138435	7.53364	0	0
MIR663AHG:27	FAM182B	9.19827	0.192788	0.414626	0.18494	0	0	2.07824	0	0
MIR663AHG:28	FAM182B	13.328	0.0357511	0.166009	0.554821	0	0.415305	6.23473	0	7.60476
MIR663AHG:9	FAM182B	1.48289	0.725794	0.881135	1.10964	0.146027	1.79966	4.15649	0	0
MIR762HG:1	BCL7C	-5.40518	0.233785	0.463297	7.02773	4.3808	0	1.81846	0	0
MIR9-3HG:2	POLG	1.63762	0.769729	0.902789	2.7741	0	0	4.41627	0	0
MIR9-3HG:4	POLG	34.1987	0.0149187	0.109187	0	0.146027	0	5.97495	0	0
MIR9-3HG:6	POLG	2.41271	0.447438	0.678972	0.739761	1.60629	4.56836	10.651	0	5.91481
MIR9-3HG:9	POLG	3.09825	0.343776	0.583747	1.10964	0	1.66122	7.53364	0	0.844973
MKX-AS1:1	MKX	-8.9576	0.323475	0.565595	0	0.43808	0	0	0	0
MMP25-AS1:11	MMP25	2.93905	0.212402	0.438344	5.08586	2.04437	4.42992	24.4194	0	9.2947
MMP25-AS1:16	MMP25	1.42267	0.779227	0.908679	1.66446	0	0.138435	2.33802	0	0
MNX1-AS1:1	MNX1	4.94744	0.0765268	0.24536	5.2708	2.33642	2.49183	36.3693	0	13.5196
MRGPRF-AS1:2	MRGPRF	7.62979	0.0607399	0.218866	2.58916	0.584106	0	20.2629	0	4.22487
MRVI1-AS1:1	MRVI1	-76.1095	0.06919	0.233512	3.42139	0.584106	0	0	0	0
MSC-AS1:8	MSC	-79.2315	0.051045	0.199934	4.16115	0	0	0	0	0
MYCNOS:5	MYCN	-1	1	1	0	0	0	0	0	0
MZF1-AS1:1	MZF1	-1.82486	0.726834	0.881635	2.68163	0	0	1.2989	0	0
NAGPA-AS1:3	NAGPA	-1.72079	0.636066	0.825171	1.57199	1.89834	4.29149	3.37715	0	0.844973
NBR2:1	BRCA1	-51.7144	0.062652	0.222487	2.68163	0	0	0	0	0
NDUFA6-AS1:1	NDUFA6	-2.63633	0.383837	0.620349	1.66446	1.75232	10.5211	3.37715	0	1.68995
NDUFB2-AS1:1	NDUFB2	-44.1316	0.0802152	0.252496	1.57199	0.584106	0.138435	0	0	0
NDUFV2-AS1:2	NDUFV2	50.9468	0.00704631	0.0749492	0	0	0	2.33802	0	0
NDUFV2-AS1:5	NDUFV2	2.30072	0.514013	0.734963	2.95904	0.292053	0	7.27385	0	0
NEAT1:12	FRMD8	-2.22562	0.370024	0.60559	12.2061	25.1166	3.73775	15.3271	0	2.53492
NEAT1:14	FRMD8	-2.11697	0.591592	0.792642	0	6.13311	13.2898	0	9.18552	0
NEBL-AS1:3	NEBL	6.20712	0.0971584	0.281	1.29458	0	2.90714	16.8857	0	9.2947
NEBL-AS1:5	NEBL	-1.04625	0.964977	0.988969	2.68163	1.60629	2.49183	5.97495	0	0
NFYC-AS1:1	NFYC	1.03724	0.974291	0.992986	4.34609	0	6.09115	8.83254	0	1.68995
NIPBL-AS1:1	NIPBL	3.05439	0.262952	0.49886	4.80845	0.43808	8.02924	17.4053	5.51131	17.7444
NIPBL-AS1:2	NIPBL	-112.953	0.0216887	0.130969	3.79127	2.1904	0	0	0	0
NIPBL-AS1:4	NIPBL	1.34802	0.789392	0.912141	5.17833	0	2.63027	7.01407	0	3.37989
NKILA:1	PMEPA1	1.00653	0.995008	1	9.70936	1.46027	9.13672	14.2879	0	5.91481
NKX2-2-AS1:1	NKX2-2	-6.70831	0.143843	0.349259	4.53103	4.3808	0	1.03912	0	0
NOP14-AS1:11	NOP14	-51.7724	0.000748697	0.0235696	9.80183	3.65066	9.96733	0.259781	0	0
NOP14-AS1:2	NOP14	-1.344	0.76047	0.896716	4.71598	3.35861	3.18401	7.79342	0	0
NORAD:6	CNBD2	-1.51347	0.632191	0.822769	6.1955	7.59338	7.61393	0	8.57315	5.91481
NORAD:7	CNBD2	-3.44283	0.107854	0.297373	6.47291	19.5676	20.2115	1.2989	7.34841	5.06984
NR2F1-AS1:1	NR2F1	-1	1	1	0	0	0	0	0	0
NR2F1-AS1:29	NR2F1	-129.123	0.0162423	0.113209	1.66446	1.60629	3.59931	0	0	0
NR2F1-AS1:34	NR2F1	-2.28475	0.498634	0.722622	4.25362	0	1.24592	2.07824	0	0
NR2F1-AS1:35	NR2F1	-13.226	0.0406462	0.178636	1.38705	3.50464	3.46088	0	0	0.844973
NR2F1-AS1:7	NR2F1	55.131	0.0189343	0.122123	0.739761	0	0	18.1846	0	27.0391
NRSN2-AS1:1	NRSN2	2.07344	0.606199	0.803611	4.99339	0.146027	0	7.27385	0	3.37989
NRSN2-AS1:4	NRSN2	-2.8883	0.251816	0.484828	8.22984	3.06656	1.66122	3.89671	0	0
NUTM2A-AS1:16	NUTM2A	-47.164	0.164058	0.375459	0	2.48245	0	0	0	0
NUTM2A-AS1:4	NUTM2A	-116.188	0.00969351	0.0882372	1.75693	2.48245	1.93809	0	0	0
NUTM2A-AS1:6	NUTM2A	2.03594	0.570827	0.779432	4.34609	0	3.46088	0	8.57315	7.60476
NUTM2B-AS1:7	NUTM2B	22.8876	0.00259864	0.0434591	5.45574	0.292053	0	112.225	5.51131	16.0545
OIP5-AS1:21	OIP5	2.0642	0.625556	0.818315	1.10964	0	11.9054	0	26.9442	0
OIP5-AS1:24	OIP5	-1.05532	0.969796	0.99054	3.23645	5.40298	0	0	0	8.44973
OLMALINC:1	SCD	-1.6296	0.648673	0.83286	2.58916	2.1904	0.553741	0	1.8371	1.68995
OOEP-AS1:2	OOEP	-111.397	0.028679	0.149027	3.42139	2.48245	0	0	0	0
OPCML-IT1:1	OPCML	-67.9111	0.0273331	0.145712	2.31175	0	1.24592	0	0	0
OR2A1-AS1:10	OR2A1	-2.0352	0.212627	0.438609	47.7146	29.0593	18.5503	9.61188	14.0845	23.6592
OR2A1-AS1:12	OR2A1	12.2421	0.00423694	0.0564882	7.67502	1.02219	3.18401	84.1689	0.612368	61.683
OR2A1-AS1:2	OR2A1	1.20464	0.903353	0.963686	5.17833	0	0	5.45539	0.612368	0
OR2A1-AS1:4	OR2A1	7.15518	0.0245978	0.138549	16.2747	5.40298	3.73775	91.183	0	91.2571
OSMR-AS1:2	OSMR	-52.6738	0.0790486	0.250713	1.01717	1.75232	0	0	0	0
OSTM1-AS1:2	OSTM1	2.37874	0.28228	0.520871	10.5416	14.6027	22.9802	76.1157	0	38.0238
OXCT1-AS1:4	OXCT1	-2.73476	0.473749	0.70089	4.80845	0	5.26053	3.37715	0	0
P3H2-AS1:2	P3H2	-6.17963	0.208316	0.43298	6.10303	5.25695	0	1.55868	0	0
P3H2-AS1:3	P3H2	-5.04514	0.233105	0.462437	13.778	0.43808	9.96733	0	0	5.06984
PABPC1L2B-AS1:1	PABPC1L2B	1.97711	0.518064	0.738383	0.462351	2.1904	6.50645	10.3912	0	7.60476
PAN3-AS1:3	PAN3	-4.83781	0.19887	0.422261	6.38044	0	8.02924	2.59781	0	0
PANDAR:1	CDKN1A	2.99597	0.3567	0.594293	1.10964	1.31424	0	1.81846	5.51131	0
PAQR9-AS1:16	PAQR9	-110.263	0.00886324	0.0842713	1.38705	3.65066	0.830611	0	0	0
PARD6G-AS1:1	PARD6G	-114.493	0.0256593	0.141032	2.03434	0.584106	3.46088	0	0	0
PARD6G-AS1:2	PARD6G	-6.06716	0.277851	0.515647	5.91809	0	0	0.779342	0	0
PARTICL:2	MAT2A	-1.82661	0.77093	0.903603	0	2.92053	0	0	0	1.68995
PARTICL:3	MAT2A	-88.86	0.0247305	0.138874	2.31175	0.584106	1.79966	0	0	0
PAX8-AS1:12	PAX8	-353.431	0.00216578	0.0391995	5.45574	0	13.4282	0	0	0
PAX8-AS1:16	PAX8	1.9004	0.759737	0.896143	1.94187	0	0	3.63693	0	0
PAX8-AS1:22	PAX8	-1.60044	0.616914	0.811706	4.62351	2.33642	3.18401	5.19561	0.612368	0
PAXBP1-AS1:3	PAXBP1	-2.83339	0.225783	0.453654	8.9696	21.7579	14.8126	9.09232	0	6.75978
PAXBP1-AS1:4	PAXBP1	-12.8855	0.0755803	0.243601	18.1241	0	0.692176	0	0	1.68995
PAXIP1-AS1:3	PAXIP1	3.71323	0.290513	0.528942	0.27741	5.40298	0	15.8466	0	5.06984
PAXIP1-AS1:9	PAXIP1	-1.0911	0.945123	0.979002	0	2.04437	3.73775	4.93583	0	0
PCA3:1	PRUNE2	-211.686	0.00674414	0.0731212	3.51386	5.84106	1.93809	0	0	0
PCBP1-AS1:46	PCBP1	-6.80756	0.00467678	0.0590784	24.8745	55.9282	22.1496	5.71517	1.8371	7.60476
PCOLCE-AS1:1	PCOLCE	-3.5787	0.51856	0.738753	0	0.146027	0	0	0	0
PCSK6-AS1:1	PCSK6	1.16029	0.921811	0.972395	1.94187	0	0.27687	0.259781	0	2.53492
PDCD4-AS1:1	PDCD4	-1.16413	0.903409	0.963686	0.647291	0	2.49183	1.03912	0	1.68995
PDX1-AS1:3	PDX1	1.7157	0.737802	0.883603	0	0	3.59931	5.97495	0	0
PDZRN3-AS1:8	PDZRN3	9.11784	0.0956717	0.278735	0.554821	0	0	4.67605	0	0.844973
PGM5-AS1:1	PGM5	5.35877	0.0474943	0.194039	13.6856	6.27914	4.29149	100.275	0	29.5741
PGM5-AS1:5	PGM5	-3.11873	0.398406	0.634903	13.0383	0	20.35	0	0	10.9846
PITPNA-AS1:3	PITPNA	-1.41814	0.745997	0.888361	2.31175	5.84106	0.969046	0	4.89894	1.68995
PKNOX2-AS1:1	PKNOX2	1.81558	0.645384	0.83143	3.05151	0	0	1.55868	0	4.22487
PLCG1-AS1:1	PLCG1	3.38581	0.287745	0.525826	1.8494	2.48245	0	11.9499	0	2.53492
PPP3CB-AS1:1	PPP3CB	18.1959	0.0796133	0.251259	0.554821	0	0	11.1706	0	0
PPP4R1-AS1:1	PPP4R1	16.0163	0.00447565	0.0579565	6.47291	0	1.66122	108.069	7.34841	16.0545
PRICKLE2-AS3:2	PRICKLE2	-3.39661	0.408769	0.646218	5.91809	8.32351	0	3.89671	0	0
PRKAG2-AS1:1	PRKAG2	4.08965	0.0491736	0.196958	11.1889	7.88543	5.39897	70.9201	4.28657	24.5042
PRKAG2-AS1:4	PRKAG2	58.658	0.00187501	0.0364868	1.47952	0	0	74.2972	1.22474	16.8995
PRKAG2-AS1:5	PRKAG2	3.13501	0.349728	0.590008	2.21928	0	0.553741	0	0	9.2947
PRKAR2A-AS1:1	PRKAR2A	3.05376	0.290087	0.528737	0	3.94272	3.04557	11.9499	0	9.2947
PRKAR2A-AS1:7	PRKAR2A	-13.5769	0.125553	0.323517	3.51386	0	6.22958	0	0	0.844973
PRKCQ-AS1:2	PRKCQ	11.4779	0.0434819	0.185411	3.14398	0	0	25.1987	0	11.8296
PRNCR1:1	POU5F1B	-1.44815	0.674586	0.8504	4.62351	5.11093	5.1221	3.37715	4.28657	2.53492
PROX1-AS1:10	PROX1	-1.57598	0.580203	0.785859	10.4491	10.3679	2.7687	8.0532	0	6.75978
PRRX2-AS1:2	PRRX2	-23.8275	0.177458	0.392517	1.20211	0	0	0	0	0
PSMA3-AS1:24	PSMA3	-10.1699	0.173044	0.387009	0	5.25695	2.07653	0	0	0.844973
PSMB8-AS1:1	PSMB8	1.32214	0.862027	0.945958	1.47952	0	0	1.81846	0	0
PSMB8-AS1:9	PSMB8	-1.12886	0.930152	0.975747	2.12681	3.21258	0	3.11737	0.612368	0.844973
PSMD5-AS1:3	PSMD5	-171.087	0.0168096	0.114083	0.0924701	0.730133	8.30611	0	0	0
PTOV1-AS1:6	PTOV1	-354.972	0.000575475	0.0204478	2.49669	11.098	5.39897	0	0	0
PTPRD-AS1:2	PTPRD	-51.423	0.114434	0.307671	2.68163	0	0	0	0	0
PTPRD-AS2:1	PTPRD	89.0321	0.000164544	0.0106921	0.27741	0	0	13.2488	2.44947	16.8995
PTPRG-AS1:10	PTPRG	-17.1999	0.00493681	0.0615547	10.9115	5.98709	13.0129	0	1.8371	0
PVRL3-AS1:3	PVRL3	-22.261	0.149427	0.357646	1.10964	0	0	0	0	0
PVT1:10	TMEM75	8.47482	0.158566	0.36802	1.94187	0	0	12.7292	0	4.22487
PVT1:18	TMEM75	-4.89804	0.121233	0.316382	3.88374	2.62848	5.95271	2.07824	0	0
PVT1:5	TMEM75	3.28241	0.394595	0.630921	1.38705	0.43808	0.692176	1.81846	0	6.75978
RAB11B-AS1:2	RAB11B	-1.80923	0.682339	0.854574	0	0	5.67584	2.85759	0	0
RABGAP1L-IT1:1	RABGAP1L	-8.35925	0.0312126	0.155325	5.73315	8.76159	16.3353	3.11737	0	0
RAD51-AS1:1	RAD51	-4.27775	0.0743409	0.241223	18.4016	16.2089	17.3044	3.89671	0	8.44973
RAET1E-AS1:1	RAET1E	12.3242	0.000336361	0.0159487	3.79127	11.9742	2.63027	148.335	22.0452	55.7682
RAET1E-AS1:3	RAET1E	1089.27	0.00041651	0.0173109	0	0	0	49.6181	0	8.44973
RAET1E-AS1:4	RAET1E	4.35471	0.368648	0.604027	6.75032	0	0	0	10.4103	19.4344
RAMP2-AS1:2	RAMP2	3.74665	0.375644	0.611069	3.88374	0	0	12.7292	1.8371	0
RAMP2-AS1:4	RAMP2	-1.82657	0.433086	0.665747	69.0752	73.0133	38.2081	58.7104	0	39.7137
RAMP2-AS1:6	RAMP2	-2.61324	0.394692	0.630926	3.05151	9.63775	0	1.55868	0	3.37989
RARA-AS1:1	RARA	6.19968	0.197566	0.420496	0	0	9.69046	38.1877	0	21.9693
RARA-AS1:4	RARA	-361.537	0.00162991	0.0342943	14.6103	4.67285	0	0	0	0
RASAL2-AS1:1	RASAL2	28.1294	0.023133	0.135203	3.14398	0	0	65.4647	0	25.3492
RASSF1-AS1:1	RASSF1	-4.27185	0.149379	0.357646	2.21928	5.40298	10.2442	3.63693	0	0
RASSF8-AS1:10	RASSF8	19.4697	0.000137515	0.00935243	5.73315	6.57119	2.63027	142.879	6.12368	142.8
RASSF8-AS1:8	RASSF8	6.10182	0.232764	0.462164	3.14398	0	0	16.8857	0	2.53492
RASSF8-AS1:9	RASSF8	-4.99794	0.156511	0.364759	2.95904	3.06656	0.830611	1.03912	0	0
RBFADN:3	RP11-795F19.5	4.80971	0.225971	0.453762	2.68163	0.146027	0	10.3912	0	3.37989
RBFADN:8	RP11-795F19.5	-7.66218	0.00351668	0.0519045	79.6168	44.246	53.2975	9.09232	0.612368	13.5196
RBM26-AS1:15	RBM26	-33.5749	0.0100879	0.0898441	2.03434	16.355	3.46088	0	0	0.844973
RBPMS-AS1:1	RBPMS	45.9017	0.000953142	0.0268515	8.59972	0	0	273.289	11.0226	115.761
RFX3-AS1:1	RFX3	-10.4971	0.0288559	0.149595	11.5588	2.7745	16.3353	0	0	3.37989
RGMB-AS1:4	RGMB	-92.943	0.0570193	0.21094	4.90092	0	0	0	0	0
RGPD4-AS1:3	RGPD4	-2.6691	0.383675	0.620236	7.02773	3.50464	5.26053	5.45539	0	0
RHPN1-AS1:2	RHPN1	-60.077	0.0969492	0.280636	3.14398	0	0	0	0	0
RMDN2-AS1:16	RMDN2	-2.32773	0.395965	0.63189	4.06868	4.3808	0.969046	0.519561	1.22474	2.53492
RNASEH1-AS1:3	RNASEH1	1.13645	0.926567	0.973765	1.01717	0	1.24592	2.33802	0	0
RNASEH2B-AS1:3	RNASEH2B	-36.2416	0.0881495	0.266626	0.36988	0	1.52279	0	0	0
RNF139-AS1:5	RNF139	-206.098	0.00190202	0.0369058	3.42139	4.52682	3.04557	0	0	0
RNF144A-AS1:8	RNF144A	-33.5339	0.190051	0.411056	0	1.75232	0	0	0	0
RNF219-AS1:17	RNF219	1.88689	0.738476	0.883939	3.51386	0	0	0	6.73605	0
RORB-AS1:1	RORB	3.17211	0.201051	0.425133	14.2404	3.65066	9.82889	78.1939	0	9.2947
RPARP-AS1:17	RPARP	15.6185	0.0105172	0.0920109	4.71598	1.02219	0	63.906	2.44947	24.5042
RPARP-AS1:23	RPARP	-1.77123	0.70948	0.872498	1.57199	0	3.46088	2.59781	0	0
RPARP-AS1:3	RPARP	9.38081	0.139869	0.343128	0.924701	0	0	9.09232	0	0
RPS6KA2-AS1:2	RPS6KA2	-157.932	0.0263003	0.143501	1.29458	1.16821	5.95271	0	0	0
RTCA-AS1:4	RTCA	-2.98685	0.176242	0.390254	7.1202	12.4123	6.92176	1.2989	6.73605	0.844973
RUNDC3A-AS1:5	RUNDC3A	-28.3614	0.122514	0.318736	1.29458	0.146027	0	0	0	0
RUVBL1-AS1:1	RUVBL1	-1	1	1	0	0	0	0	0	0
SATB1-AS1:3	SATB1	103.266	1.66783e-06	0.000701842	0.462351	1.31424	0	131.709	15.9216	38.8688
SATB2-AS1:1	SATB2	-1.7345	0.641308	0.828459	0	2.33642	7.33706	4.41627	0	0.844973
SATB2-AS1:9	SATB2	-3.65265	0.102038	0.288544	15.8124	10.0758	17.9966	5.97495	0	5.91481
SCAMP1-AS1:1	SCAMP1	1.31288	0.834865	0.933126	4.25362	0	4.70679	10.651	0	0.844973
SENCR:1	FLI1	-1.61043	0.553413	0.766378	13.2232	8.03146	1.10748	2.85759	6.12368	5.06984
SEPT7-AS1:1	42985	-63.927	0.0499352	0.198547	0.0924701	2.1904	1.10748	0	0	0
SERTAD4-AS1:1	SERTAD4	-160.286	0.0317489	0.157065	8.50725	0	0	0	0	0
SFTPD-AS1:1	SFTPD	-6.24505	0.00982844	0.0885876	20.8982	30.8116	12.0439	2.85759	2.44947	5.06984
SGMS1-AS1:3	SGMS1	-1.02232	0.989077	1	4.71598	0	0	4.41627	0	0
SGO1-AS1:3	SGO1	-11.5521	0.241186	0.471927	0	0.584106	0	0	0	0
SGO1-AS1:8	SGO1	-128.361	0.0343135	0.162599	1.20211	1.75232	3.87618	0	0	0
SH3RF3-AS1:2	SH3RF3	5.88721	0.0175804	0.117102	7.1202	6.27914	3.87618	80.7917	8.57315	11.8296
SIX3-AS1:7	SIX3	6.00295	0.260755	0.496231	1.47952	0	0	1.03912	0	8.44973
SLC16A1-AS1:14	SLC16A1	-4.24885	0.210175	0.435149	8.0449	2.1904	2.49183	0	0	3.37989
SLC16A1-AS1:3	SLC16A1	1.78054	0.651211	0.835163	2.58916	2.92053	0.830611	7.79342	0	3.37989
SLC25A21-AS1:2	SLC25A21	-5.20121	0.228581	0.456337	2.95904	0.146027	2.21496	0.779342	0	0
SLC7A11-AS1:2	SLC7A11	-5.21784	0.0365643	0.167931	28.3883	11.8281	3.18401	4.67605	0	3.37989
SMC5-AS1:1	SMC5	-266.171	0.0137743	0.104262	1.75693	0	12.4592	0	0	0
SMG7-AS1:4	SMG7	-1.40231	0.782187	0.908951	1.01717	0	2.3534	2.07824	0	0
SMIM2-AS1:11	SMIM2	-2.31335	0.477305	0.704335	6.1955	0.876159	5.81428	4.41627	0	0.844973
SNAI3-AS1:12	SNAI3	-50.0807	0.0557584	0.207827	2.58916	0	0	0	0	0
SNAI3-AS1:16	SNAI3	1.21497	0.808132	0.919579	13.0383	6.27914	6.92176	17.4053	0	14.3645
SNAP25-AS1:4	SNAP25	5.88361	0.119235	0.313251	1.29458	0.292053	0	7.01407	0	2.53492
SNHG10:4	GLRX5	1.22484	0.862624	0.945958	2.49669	0	1.38435	4.41627	0	0
SNHG11:4	RALGAPB	-27.4687	0.122916	0.319229	1.38705	0	0	0	0	0
SNHG12:1	TRNAU1AP	-78.9631	0.0422063	0.18193	2.7741	0	1.38435	0	0	0
SNHG15:11	MYO1G	-57.1871	0.0792141	0.250927	0.832231	2.04437	0.138435	0	0	0
SNHG18:2	SEMA5A	3.15449	0.342921	0.583363	1.20211	1.75232	0.27687	2.07824	0	8.44973
SNHG20:14	SEC14L1	-10.8547	0.0307354	0.153974	5.36327	2.48245	5.53741	0	0.612368	0.844973
SNHG22:1	ACAA2	1.47582	0.520634	0.740215	20.251	16.647	15.6432	28.5759	6.12368	43.0936
SNHG4:3	SIL1	-6.6947	0.0997001	0.2842	6.1955	5.40298	5.81428	1.55868	0	0.844973
SNHG6:1	MCMDC2	-2.62734	0.395109	0.631293	1.01717	1.31424	2.21496	0.259781	0	1.68995
SNHG7:1	FAM69B	-1.27967	0.807094	0.919551	6.75032	0.43808	4.42992	7.79342	0	0.844973
SNHG7:6	FAM69B	24.0337	0.00908895	0.0851984	0.27741	0	0.692176	21.5618	0	2.53492
SNHG7:7	FAM69B	-539.963	9.21982e-05	0.00744514	19.3263	7.1553	2.3534	0	0	0
SOX21-AS1:1	SOX21	6.47611	0.0293879	0.151276	4.25362	3.79669	8.85985	55.593	0	54.0783
SOX21-AS1:3	SOX21	10.9952	0.0298247	0.152244	0.18494	0.584106	1.10748	6.75429	0	14.3645
SP2-AS1:12	SP2	-6.38742	0.10948	0.300011	6.65785	4.81887	2.3534	0	0	2.53492
SP2-AS1:14	SP2	-242.586	0.00118244	0.0293627	6.65785	3.35861	2.90714	0	0	0
SP2-AS1:15	SP2	-39.8022	0.00315709	0.0490348	4.34609	4.9649	8.44454	0.259781	0	0
SPACA6P-AS:2	SPACA6P	-42.4608	0.0722676	0.237935	0.832231	0	1.38435	0	0	0
SPAG5-AS1:1	SPAG5	-209.134	0.00414493	0.0560398	6.75032	4.3808	0	0	0	0
SPATA3-AS1:11	SPATA3	-59.0393	0.0844824	0.259616	2.12681	0	0.969046	0	0	0
SRP14-AS1:21	SRP14	-101.305	0.0248059	0.139066	1.20211	3.21258	0.969046	0	0	0
SRRM2-AS1:1	SRRM2	2.01506	0.552191	0.765733	5.2708	1.89834	0	10.1314	0	4.22487
SSSCA1-AS1:1	SSSCA1	-66.1798	0.0713059	0.236971	3.32892	0	0.138435	0	0	0
ST20-AS1:1	ST20	-10.816	0.0074306	0.0775662	9.06207	6.42517	10.2442	1.81846	0	0
ST3GAL5-AS1:1	ST3GAL5	4.25582	0.185312	0.404836	1.47952	3.50464	3.18401	17.9249	0	16.8995
ST3GAL6-AS1:1	ST3GAL6	1.22933	0.896549	0.961986	1.75693	0	0.27687	2.33802	0	0
STARD4-AS1:1	STARD4	-1.42841	0.809451	0.919703	2.68163	1.75232	0	2.85759	0	0
STARD7-AS1:2	STARD7	1.58135	0.66167	0.841935	1.29458	1.46027	5.95271	13.2488	0	0
STXBP5-AS1:9	STXBP5	-384.601	0.00224799	0.039936	1.38705	4.23477	14.951	0	0	0
TAPT1-AS1:5	TAPT1	5.53663	0.208355	0.43298	1.29458	0	0.830611	9.3521	0	2.53492
TAPT1-AS1:7	TAPT1	2.02324	0.462891	0.691359	3.97621	0.146027	2.3534	1.03912	4.89894	7.60476
TBX2-AS1:19	TBX2	1.42983	0.669525	0.846874	2.31175	2.48245	3.32244	9.3521	0	1.68995
TBX2-AS1:6	TBX2	9.3566	0.0403856	0.178072	3.51386	0	2.07653	44.1627	0	8.44973
TCEB3-AS1:3	TCEB3	-2.63789	0.590408	0.791786	1.57199	2.33642	0	1.2989	0	0
TCL6:5	TCL1B	-180.596	0.0117048	0.0964608	2.7741	6.71722	0.138435	0	0	0
TESC-AS1:1	TESC	8.46591	0.0207474	0.128067	6.84279	2.04437	4.29149	84.6885	0	27.0391
TEX26-AS1:4	TEX26	-34.2395	0.127796	0.326423	1.75693	0	0	0	0	0
TFAP2A-AS1:1	TFAP2A	-154.541	0.0193088	0.122951	2.68163	5.54901	0	0	0	0
TGFB2-AS1:1	TGFB2	-1	1	1	0	0	0	0	0	0
THRB-AS1:1	THRB	-27.2587	0.169727	0.382966	1.38705	0	0	0	0	0
THUMPD3-AS1:19	THUMPD3	-6.03825	0.227778	0.455807	1.47952	2.62848	0	0	0	0.844973
TINCR:5	SAFB2	-2.23523	0.588564	0.791786	1.10964	0.43808	0	0.519561	0	0
TIPARP-AS1:1	TIPARP	4.26772	0.101399	0.287218	14.4253	11.8281	0	47.0203	3.67421	61.683
TIPARP-AS1:2	TIPARP	-7.20502	0.136871	0.338682	4.53103	1.75232	4.01462	0	0	1.68995
TMEM147-AS1:2	TMEM147	-41.0788	0.128706	0.327752	2.12681	0	0	0	0	0
TMEM161B-AS1:1	TMEM161B	1.44828	0.800444	0.916919	0	3.06656	0	0	3.67421	0.844973
TMEM26-AS1:1	TMEM26	6.39153	0.226478	0.454102	1.10964	0	0	6.49451	0	0.844973
TMEM9B-AS1:1	TMEM9B	3.04354	0.107761	0.297359	1650.78	555.193	821.336	6165.89	140.845	2906.71
TMPO-AS1:1	TMPO	4.19957	0.089739	0.268728	10.7265	2.62848	4.70679	48.8387	0	27.0391
TNK2-AS1:1	TNK2	-3.86957	0.305901	0.545707	3.51386	0	8.16767	1.2989	0	1.68995
TNRC6C-AS1:4	TNRC6C	-1	1	1	0	0	0	0	0	0
TP53TG1:1	CROT	-225.326	0.0131674	0.101639	1.29458	1.46027	9.27515	0	0	0
TPT1-AS1:25	TPT1	-30.89	0.0136243	0.103769	2.86657	3.21258	7.33706	0.259781	0	0
TPT1-AS1:31	TPT1	-2.37949	0.578461	0.784921	8.0449	0	1.52279	0	0	4.22487
TPT1-AS1:38	TPT1	1.48042	0.736279	0.883162	1.10964	2.7745	0.415305	5.97495	0	0
TPT1-AS1:39	TPT1	-102.062	0.0272339	0.145564	1.47952	3.94272	0	0	0	0
TPT1-AS1:44	TPT1	1.75641	0.719662	0.876852	1.8494	0	0	3.11737	0	0
TRAF3IP2-AS1:1	TRAF3IP2	-1.48751	0.664458	0.843518	7.30514	1.02219	2.21496	3.63693	0	3.37989
TRAM2-AS1:1	TRAM2	2.70483	0.24219	0.473419	7.76749	12.8503	6.22958	56.1126	0	16.0545
TRG-AS1:1	TRG	-11.7297	0.0566433	0.210358	0.554821	1.75232	14.2588	0	0	1.68995
TRG-AS1:5	TRG	-4.85962	0.371362	0.607036	0.647291	0	2.90714	0	0	0.844973
TRHDE-AS1:1	TRHDE	6.8484	0.111334	0.303363	1.66446	0	1.79966	17.1455	0	6.75978
TRHDE-AS1:7	TRHDE	-1.05539	0.953915	0.984766	8.87713	3.79669	2.21496	9.61188	0	4.22487
TRIM52-AS1:8	TRIM52	9.36759	0.0441236	0.186531	0.18494	0.584106	0.138435	7.53364	0	0.844973
TRPM2-AS:4	TRPM2	-1	1	1	0	0	0	0	0	0
TSC22D1-AS1:2	TSC22D1	-58.2278	0.140878	0.344545	3.05151	0	0	0	0	0
TSC22D1-AS1:3	TSC22D1	21.067	1.2331e-06	0.000593033	10.9115	7.44735	9.82889	359.276	105.94	129.281
TSIX:1	CHIC1	-2.23694	0.205418	0.429794	21.638	34.6083	28.9329	10.9108	5.51131	21.9693
TTC28-AS1:1	TTC28	-11.5636	0.0132948	0.102068	13.2232	9.49172	10.1058	0	0	3.37989
TTTY14:6	HSFY2	-1.51966	0.798704	0.916284	1.8494	0	4.01462	3.63693	0	0
TUG1:1	MORC2	10.1029	0.000734676	0.0235696	8.59972	10.3679	4.15305	154.05	40.4163	38.8688
TUG1:24	MORC2	-4.36204	0.330526	0.573565	0.554821	4.52682	4.01462	1.81846	0	0
UBAC2-AS1:5	UBAC2	-89.2329	0.0508141	0.199709	3.97621	0.730133	0	0	0	0
UBXN7-AS1:2	UBXN7	76.0412	0.00335902	0.0507092	0	0	0	3.63693	0	0
UCKL1-AS1:1	UCKL1	1.45131	0.62308	0.816981	21.4531	11.8281	18.8272	49.0985	0	26.1942
UGDH-AS1:1	UGDH	-3.24924	0.0688719	0.233065	20.9907	19.5676	52.0516	13.7684	11.635	2.53492
UGDH-AS1:6	UGDH	-14.8752	0.0383909	0.173248	10.7265	4.23477	4.29149	0	0.612368	0.844973
UNC5B-AS1:4	UNC5B	-4.38462	0.23507	0.464689	5.73315	1.31424	0	1.2989	0	0
USP2-AS1:1	USP2	-1.09375	0.918762	0.971905	16.3672	3.50464	14.951	26.2378	0	5.06984
USP3-AS1:3	USP3	329.809	0.000178886	0.0108508	0	0	0	9.3521	3.06184	5.06984
USP30-AS1:3	USP30	4.87972	0.21667	0.443468	1.38705	0.146027	0	2.85759	0	5.06984
USP46-AS1:3	USP46	6.27449	0.17307	0.387009	4.71598	0	5.81428	38.4475	0	27.8841
VIM-AS1:5	VIM	-5.19873	0.0555159	0.20743	5.08586	19.5676	27.1333	6.23473	0	3.37989
VLDLR-AS1:4	VLDLR	2.93167	0.399021	0.635432	4.71598	0	1.52279	14.0281	0	4.22487
VLDLR-AS1:5	VLDLR	3.47699	0.133704	0.334782	5.82562	5.40298	10.7979	45.2018	0	31.264
VPS13A-AS1:1	VPS13A	1.17451	0.897422	0.96231	3.32892	2.48245	0	6.49451	0	0
VWA8-AS1:2	VWA8	1.05205	0.963853	0.988326	1.94187	0	1.52279	2.59781	0	0.844973
WAC-AS1:3	WAC	30.4873	0.0192166	0.12264	0.647291	0.146027	0	23.64	0	2.53492
WAC-AS1:4	WAC	4.20506	0.296652	0.536924	0.18494	2.04437	1.24592	11.9499	0	2.53492
WAC-AS1:6	WAC	4.98065	0.302944	0.543346	1.57199	0	0.27687	1.55868	7.96078	0
WARS2-IT1:1	WARS2	-5.32897	0.0843716	0.259394	3.14398	3.06656	17.8581	0.779342	0.612368	3.37989
WDFY3-AS2:3	WDFY3	33.5235	0.00108266	0.0288271	1.57199	0.43808	0	58.7104	7.96078	3.37989
WDR11-AS1:6	WDR11	-11.6536	0.00421619	0.0564882	7.02773	16.355	35.301	3.63693	0	0.844973
WDR11-AS1:9	WDR11	-4.94671	0.283564	0.522505	9.52442	8.61556	0	0	3.67421	0
WDR86-AS1:8	WDR86	3.89004	0.485811	0.710925	1.38705	0	0	5.45539	0	0
WT1-AS:1	WT1	3.81577	0.0384187	0.173257	11.1889	12.7043	8.58298	81.0515	8.57315	33.7989
WT1-AS:4	WT1	1.18939	0.912165	0.968735	2.86657	2.7745	0	6.49451	0	0
WWTR1-AS1:5	WWTR1	1.33079	0.807105	0.919551	8.41478	0.876159	0	8.0532	0	4.22487
YTHDF3-AS1:1	YTHDF3	-72.294	0.0600483	0.217485	3.79127	0	0	0	0	0
ZBED3-AS1:8	ZBED3	-3.36657	0.408193	0.645611	2.86657	2.33642	0	1.2989	0	0
ZBED5-AS1:2	ZBED5	-166.091	0.0201181	0.126475	0	0	8.85985	0	0	0
ZBED5-AS1:8	ZBED5	-39.6507	0.0783603	0.249574	2.03434	0	0	0	0	0
ZEB1-AS1:2	ZEB1	-2.87662	0.460983	0.689733	4.53103	1.46027	0	1.81846	0	0
ZEB1-AS1:3	ZEB1	2.9333	0.364477	0.600618	4.06868	0	7.4755	23.64	0	10.1397
ZFPM2-AS1:9	ZFPM2	-8.73119	0.204955	0.429095	2.58916	2.7745	0	0	0.612368	0
ZMIZ1-AS1:12	ZMIZ1	4.48876	0.392636	0.628834	1.20211	0	0	3.89671	0	1.68995
ZMIZ1-AS1:16	ZMIZ1	-79.4184	0.0330241	0.160092	0	1.31424	2.90714	0	0	0
ZMIZ1-AS1:2	ZMIZ1	9.29699	0.131674	0.331398	0.18494	0	0	2.07824	0	0
ZMIZ1-AS1:3	ZMIZ1	1.49989	0.750559	0.89143	5.36327	0	0	3.11737	0	5.06984
ZMIZ1-AS1:9	ZMIZ1	-42.8797	0.106843	0.296162	2.21928	0	0	0	0	0
ZNF295-AS1:1	ZNF295	1.30606	0.846743	0.937993	0	0	3.59931	4.41627	0	0
ZNF337-AS1:1	ZNF337	-1.98085	0.565315	0.775146	4.62351	0	3.18401	2.85759	0	0.844973
ZNF337-AS1:2	ZNF337	1.01599	0.990248	1	2.7741	3.79669	0	0	6.73605	0
ZNF337-AS1:7	ZNF337	2.23931	0.626874	0.81912	0.554821	0	1.24592	3.89671	0	0
ZNF503-AS2:11	ZNF503	21.798	0.0274529	0.146135	0	4.9649	0	3.63693	11.635	93.792
ZNF503-AS2:2	ZNF503	4.18796	0.215734	0.442037	6.28797	0.146027	0	13.7684	0	13.5196
ZNF503-AS2:5	ZNF503	817.505	0.000350939	0.0162957	0	0	0	43.3833	0	0
ZNF503-AS2:8	ZNF503	10.7035	0.0630643	0.223403	8.13737	0	1.93809	101.574	0	6.75978
ZNF529-AS1:2	ZNF529	-36.073	0.102667	0.289593	1.8494	0	0	0	0	0
ZNF571-AS1:1	ZNF571	1.77894	0.682237	0.854574	1.94187	0	1.24592	5.45539	0	0
ZNF571-AS1:14	ZNF571	-125.366	0.0295752	0.151687	3.60633	0	3.04557	0	0	0
ZNF582-AS1:1	ZNF582	-1.32014	0.759852	0.896143	8.9696	5.11093	4.15305	0.259781	7.96078	5.91481
ZNF667-AS1:2	ZNF667	1.13432	0.933279	0.976357	1.8494	0	0.138435	2.07824	0	0
ZNF790-AS1:1	ZNF790	-183.745	0.0263915	0.143706	3.42139	0	6.36802	0	0	0
ZNRF3-AS1:1	ZNRF3	-7.49682	0.00139901	0.0318228	63.2495	44.5381	43.3302	4.67605	4.89894	10.9846
lnc-A1BG-1:2	A1BG	-20.3032	0.218515	0.445151	1.01717	0	0	0	0	0
lnc-A1BG-2:1	A1BG	-51.6954	0.0647645	0.226642	2.68163	0	0	0	0	0
lnc-A1CF-8:1	A1CF	9.34761	0.0377368	0.17133	0	0.43808	11.3517	72.219	15.9216	21.9693
lnc-A1CF-8:2	A1CF	39.3115	0.00332697	0.0506316	3.42139	0	0	90.4036	0	48.1635
lnc-AADAT-4:1	AADAT	-8.17498	0.108475	0.298281	2.95904	1.16821	4.42992	0.779342	0	0
lnc-AADAT-9:1	AADAT	-11.0218	0.00659145	0.0719291	7.85996	12.8503	45.6836	1.2989	0	5.06984
lnc-AAGAB-3:1	AAGAB	3.21932	0.35703	0.594432	2.86657	0	0	6.75429	0	2.53492
lnc-AAK1-2:2	AAK1	-3.49833	0.42962	0.663595	0	3.65066	2.7687	0	1.8371	0
lnc-AAK1-5:4	AAK1	681.434	1.06762e-05	0.0021142	0	0	0	22.0813	7.34841	6.75978
lnc-AAMP-2:1	AAMP	-122.398	0.0516481	0.201009	1.10964	0	5.39897	0	0	0
lnc-AATK-1:1	AATK	-4.83867	0.380347	0.61693	1.10964	0	4.84523	1.03912	0	0
lnc-ABCA3-1:1	ABCA3	-4.49113	0.240426	0.470852	1.94187	2.04437	0.692176	0.779342	0	0
lnc-ABCA5-7:1	ABCA5	-66.2892	0.0550615	0.206391	3.32892	0	0.138435	0	0	0
lnc-ABCB5-3:1	ABCB5	1.75339	0.431167	0.663857	7.39761	13.2884	3.59931	5.71517	26.9442	10.1397
lnc-ABCD3-1:2	ABCD3	1.13539	0.927584	0.974241	2.21928	1.89834	0	4.41627	0	0
lnc-ABCF2-2:1	ABCF2	-3.72673	0.111982	0.303991	13.3157	5.40298	11.4901	3.11737	0	5.06984
lnc-ABCG5-2:1	ABCG5	-13.4377	0.062856	0.223094	3.14398	2.1904	0.415305	0.259781	0	0
lnc-ABHD12-4:2	ABHD12	-5.93099	0.0161872	0.11302	12.391	28.1831	29.3482	2.85759	7.96078	0.844973
lnc-ABHD3-3:1	ABHD3	-2.18746	0.304302	0.544982	53.9101	12.4123	13.7051	27.5367	0	8.44973
lnc-ABI1-10:1	ABI1	-1.67891	0.730563	0.882469	6.01056	0	0.692176	0	0	4.22487
lnc-ABI1-5:2	ABI1	-5.58931	0.167873	0.380708	0.924701	0	9.69046	1.55868	0	0
lnc-ABI1-7:1	ABI1	-2.41929	0.449105	0.679511	3.32892	1.31424	6.09115	2.59781	0	1.68995
lnc-ABLIM1-1:2	ABLIM1	3.62927	0.261462	0.496571	1.94187	0	6.36802	20.7824	0	9.2947
lnc-ABLIM2-1:1	ABLIM2	-3.27416	0.306062	0.545707	5.2708	0	3.59931	1.03912	0	1.68995
lnc-ABR-5:1	ABR	-4.40993	0.147094	0.353962	4.34609	3.50464	4.56836	2.33802	0	0
lnc-ABT1-5:1	ABT1	-10.1778	0.0597234	0.217009	2.12681	4.52682	15.7816	0	0	2.53492
lnc-AC003682.1-2:1	AC003682.1	-169.6	0.00418398	0.0563414	5.54821	2.62848	0.830611	0	0	0
lnc-AC003682.1-3:1	AC003682.1	-1.21644	0.858688	0.944851	4.25362	0.146027	0.830611	1.81846	0	2.53492
lnc-AC004223.1-1:1	AC004223.1	-8.0648	0.00498828	0.0619669	19.5112	25.2626	25.3336	3.63693	0	5.06984
lnc-AC004410.1-1:14	AC004410.1	-167.804	0.0165989	0.113777	0.0924701	0	8.85985	0	0	0
lnc-AC004876.1-1:1	AC004876.1	-2.0766	0.482055	0.707736	1.38705	2.04437	2.3534	2.33802	0	0
lnc-AC005481.5.1-2:1	AC005481.5.1	9.53765	0.0964439	0.280032	0.554821	0.146027	0	5.45539	0	1.68995
lnc-AC005594.1-2:1	AC005594.1	1.35599	0.789436	0.912141	2.86657	0.876159	1.10748	5.45539	0	0.844973
lnc-AC006050.2.1-2:1	AC006050.2.1	-1.26002	0.872211	0.950061	1.38705	1.31424	1.24592	0	0	3.37989
lnc-AC006050.2.1-2:2	AC006050.2.1	-1.42238	0.759313	0.895978	5.17833	0	0.830611	2.59781	0.612368	0.844973
lnc-AC006156.1-11:1	AC006156.1	-1.13411	0.84161	0.936157	32214.8	51688.1	110973	6610.89	63072.7	102148
lnc-AC006156.1-8:1	AC006156.1	1.47193	0.736346	0.883162	2.86657	0.292053	0	0	2.44947	2.53492
lnc-AC006156.1-9:1	AC006156.1	-1.94997	0.514084	0.734963	6.28797	2.04437	1.24592	4.41627	0	0
lnc-AC006435.1-1:1	AC006435.1	1.18344	0.874251	0.950935	2.58916	1.89834	1.38435	6.49451	0	0
lnc-AC006435.1-2:1	AC006435.1	-256.686	0.00535942	0.0640941	1.20211	1.02219	11.4901	0	0	0
lnc-AC006455.1-10:1	AC006455.1	-2.33611	0.528057	0.746307	1.47952	10.3679	0	4.15649	0.612368	0
lnc-AC006455.1-12:1	AC006455.1	-2.89702	0.0528845	0.202823	43.9233	68.0484	78.908	29.3552	18.371	17.7444
lnc-AC006455.1-2:2	AC006455.1	-1.39658	0.79986	0.91683	3.88374	0	1.24592	3.37715	0	0
lnc-AC006946.15.1-9:1	AC006946.15.1	-3.1787	0.206476	0.430669	4.43856	5.25695	3.73775	2.33802	0	1.68995
lnc-AC007401.2.1-1:4	AC007401.2.1	31.2971	0.0572555	0.211349	0	0	0.415305	12.4695	0	1.68995
lnc-AC007401.2.1-1:5	AC007401.2.1	5.07347	0.0804721	0.253068	10.2642	4.67285	2.07653	57.6713	0	28.7291
lnc-AC007405.2.1-3:3	AC007405.2.1	1.13357	0.938854	0.977623	2.40422	0.730133	0	3.37715	0	0
lnc-AC007405.7.1-1:3	AC007405.7.1	1.19678	0.923119	0.972837	0	0.146027	3.46088	4.15649	0	0
lnc-AC007405.7.1-1:9	AC007405.7.1	-1.11545	0.939936	0.977878	5.36327	0	0.415305	4.93583	0	0
lnc-AC007405.7.1-3:1	AC007405.7.1	-3.45549	0.227067	0.454877	4.80845	2.04437	4.70679	2.85759	0	0
lnc-AC007663.1-1:1	AC007663.1	-18.7662	0.0684616	0.232218	4.06868	6.71722	2.3534	0	0	0.844973
lnc-AC007663.1-4:3	AC007663.1	-1.4973	0.72478	0.880436	2.12681	1.31424	8.02924	4.93583	0	2.53492
lnc-AC007663.1-6:2	AC007663.1	-5.26193	0.359358	0.596362	7.85996	0	0	1.2989	0	0
lnc-AC007952.1-1:1	AC007952.1	-37.7766	0.106113	0.294986	1.66446	0.146027	0.138435	0	0	0
lnc-AC007952.1-2:1	AC007952.1	1.04788	0.954044	0.984766	15.35	17.0851	5.1221	23.8998	0	15.2095
lnc-AC007952.2-1:1	AC007952.2	-3.4124	0.288812	0.526985	2.68163	1.02219	2.21496	0.259781	0	1.68995
lnc-AC007952.2-2:1	AC007952.2	5.44203	0.14699	0.353962	2.31175	0.876159	0	1.55868	10.4103	5.91481
lnc-AC007952.2.1-2:1	AC007952.2.1	2.53649	0.128242	0.327066	15.6274	21.904	11.9054	12.4695	38.5792	75.2026
lnc-AC008073.6.1-2:2	AC008073.6.1	-5.09912	0.00689072	0.0742323	38.745	45.1222	51.7747	7.79342	7.96078	10.9846
lnc-AC008103.1-1:1	AC008103.1	-1.40888	0.811109	0.919703	1.29458	0.146027	2.21496	2.33802	0	0
lnc-AC008103.1-6:1	AC008103.1	-1.90862	0.40944	0.646519	22.1004	1.02219	26.9949	15.8466	2.44947	7.60476
lnc-AC008103.1-7:1	AC008103.1	-83.7482	0.0533214	0.203869	1.38705	0	3.04557	0	0	0
lnc-AC008132.1-2:4	AC008132.1	-1.28713	0.88565	0.956258	1.01717	2.04437	0	0	0	2.53492
lnc-AC008132.1-3:10	AC008132.1	1.20926	0.831789	0.931388	4.43856	3.35861	1.66122	8.31298	1.8371	0.844973
lnc-AC008686.1-1:1	AC008686.1	-4.52807	0.184018	0.402663	5.36327	5.25695	2.90714	0	0	3.37989
lnc-AC008686.1-6:2	AC008686.1	-5.07717	0.109653	0.300364	4.62351	2.33642	3.32244	1.03912	0	0.844973
lnc-AC009065.1-2:1	AC009065.1	-10.743	0.147849	0.35527	6.56538	1.02219	0	0	0	0.844973
lnc-AC009065.1-2:4	AC009065.1	-8.27871	0.0180414	0.119325	14.3329	8.17748	22.1496	0.259781	0.612368	5.06984
lnc-AC009113.1-3:1	AC009113.1	-5.30833	0.0919883	0.272091	4.43856	4.81887	5.53741	0.519561	0	2.53492
lnc-AC009336.1-7:1	AC009336.1	1.12609	0.891148	0.959708	5.45574	8.17748	5.53741	18.4444	0	2.53492
lnc-AC009403.2.1-2:3	AC009403.2.1	-1.8072	0.525479	0.743913	2.7741	4.81887	2.90714	5.19561	0	0
lnc-AC009403.2.1-2:4	AC009403.2.1	-442.927	0.00131018	0.0308796	3.23645	2.04437	18.4119	0	0	0
lnc-AC009403.2.1-2:6	AC009403.2.1	-6.96854	0.147781	0.35527	24.1347	11.244	0	0.259781	0	5.06984
lnc-AC009403.2.1-3:1	AC009403.2.1	-39.3312	0.138744	0.341184	2.03434	0	0	0	0	0
lnc-AC010325.1-1:4	AC010325.1	-73.7713	0.0727877	0.238714	3.05151	0	0.830611	0	0	0
lnc-AC010336.2-1:1	AC010336.2	-2.38207	0.526926	0.745179	3.60633	0.292053	0	0.259781	0.612368	0.844973
lnc-AC010336.2-4:2	AC010336.2	-2.49758	0.488713	0.713454	1.29458	1.16821	3.18401	0	0	2.53492
lnc-AC010536.2-1:1	AC010536.2	1.98049	0.534639	0.752294	0.554821	3.94272	1.52279	5.97495	0	5.91481
lnc-AC011239.1.1-9:1	AC011239.1.1	-3.74836	0.172685	0.38679	4.62351	4.23477	15.7816	3.11737	0	3.37989
lnc-AC011298.2.1-1:5	AC011298.2.1	-2.82831	0.561881	0.773649	3.42139	0	0	1.03912	0	0
lnc-AC011298.2.1-1:6	AC011298.2.1	-1	1	1	0	0	0	0	0	0
lnc-AC011366.3.1-5:1	AC011366.3.1	-68.6759	0.0963591	0.280011	3.60633	0	0	0	0	0
lnc-AC011467.1-2:1	AC011467.1	1.19799	0.817076	0.923466	5.82562	1.89834	13.4282	2.07824	13.4721	10.1397
lnc-AC011551.1-1:1	AC011551.1	-2.82762	0.0771819	0.246638	28.0184	46.8745	47.0679	16.3662	9.79788	16.8995
lnc-AC012313.1-1:8	AC012313.1	4.20227	0.373932	0.609608	2.95904	0	0	12.4695	0	0
lnc-AC012414.1-2:1	AC012414.1	-14.2512	0.0523829	0.202096	3.79127	2.33642	0	0.259781	0	0
lnc-AC013269.5.1-1:1	AC013269.5.1	-1.08898	0.957308	0.986451	1.10964	0	1.66122	2.33802	0	0
lnc-AC013269.5.1-2:1	AC013269.5.1	1.11884	0.934939	0.976852	0.924701	2.33642	0	3.37715	0	0
lnc-AC015804.1-3:1	AC015804.1	14.0154	0.119999	0.31438	0	0	0	0	0	0.844973
lnc-AC015804.1-4:1	AC015804.1	-3.31428	0.442391	0.674507	3.23645	1.75232	0	0	0	1.68995
lnc-AC015804.1-7:1	AC015804.1	-3.39662	0.102216	0.288805	33.4742	11.9742	17.4428	9.87166	0	8.44973
lnc-AC015987.1-7:3	AC015987.1	3.58526	0.130095	0.329298	13.5006	3.06656	2.07653	41.5649	0	25.3492
lnc-AC016251.1-17:1	AC016251.1	-16.4775	0.0109308	0.0930851	6.1955	2.1904	4.70679	0.519561	0	0
lnc-AC016251.1-2:1	AC016251.1	-1.35393	0.801659	0.917206	13.5006	0.730133	0	10.1314	0	0
lnc-AC016251.1-24:1	AC016251.1	-2.15122	0.436056	0.668176	4.80845	3.50464	6.22958	0	3.67421	3.37989
lnc-AC016586.1-2:1	AC016586.1	-21.5057	0.186237	0.406329	0	0	1.10748	0	0	0
lnc-AC016757.3.1-1:2	AC016757.3.1	-1.27691	0.788576	0.911968	2.58916	2.33642	0.969046	3.37715	0	0.844973
lnc-AC017028.1-1:1	AC017028.1	-2.63412	0.466728	0.694778	2.68163	5.25695	0	1.2989	0	1.68995
lnc-AC018816.3.1-10:1	AC018816.3.1	-1.09558	0.942653	0.978182	7.39761	0	0	3.37715	0	3.37989
lnc-AC018816.3.1-17:1	AC018816.3.1	-1.90566	0.332108	0.575372	13.0383	11.3901	17.9966	3.37715	4.28657	15.2095
lnc-AC020907.3-5:1	AC020907.3	1.09498	0.946978	0.980321	4.71598	0	0	4.15649	0	0.844973
lnc-AC021218.2.1-4:1	AC021218.2.1	-44.6157	0.101709	0.287854	2.31175	0	0	0	0	0
lnc-AC021860.1-7:1	AC021860.1	-19.6716	0.0213819	0.130284	3.79127	5.98709	2.7687	0	0	0.844973
lnc-AC022098.1-1:3	AC022098.1	-4.56246	0.202894	0.426322	1.20211	1.16821	7.61393	1.81846	0	0
lnc-AC022098.1-5:1	AC022098.1	-335.383	0.000355845	0.0163224	6.65785	6.13311	5.1221	0	0	0
lnc-AC024563.1-5:1	AC024563.1	-1.85142	0.573386	0.780394	0.832231	0.146027	2.07653	1.2989	0	0
lnc-AC025287.1-3:2	AC025287.1	-2.43443	0.290361	0.528942	3.60633	4.08874	14.3973	0.779342	6.73605	1.68995
lnc-AC026150.9.1-2:2	AC026150.9.1	3.61215	0.156356	0.364759	0.739761	6.57119	0.692176	7.53364	19.5958	1.68995
lnc-AC026150.9.1-2:4	AC026150.9.1	-20.3514	0.201892	0.425605	1.01717	0	0	0	0	0
lnc-AC026150.9.1-3:1	AC026150.9.1	-3.87935	0.0872136	0.264389	7.02773	14.6027	24.2261	2.33802	0.612368	9.2947
lnc-AC026150.9.1-5:1	AC026150.9.1	-19.4511	0.0721507	0.237925	3.05151	0	4.98366	0.259781	0	0
lnc-AC027323.1-1:1	AC027323.1	-1.15112	0.897351	0.96231	0.18494	2.62848	1.52279	1.2989	0	2.53492
lnc-AC027323.1-2:3	AC027323.1	1.74677	0.723133	0.879489	0	0	5.1221	0	7.34841	1.68995
lnc-AC040934.1-1:1	AC040934.1	1218.98	9.41619e-07	0.000576356	0	0	0	39.7464	9.18552	16.0545
lnc-AC040934.1-3:5	AC040934.1	-3.55022	0.286033	0.524901	8.59972	0	2.07653	1.2989	0	1.68995
lnc-AC053481.1-4:2	AC053481.1	-5.22162	0.181176	0.398127	1.8494	0.730133	8.99828	0	0	2.53492
lnc-AC068473.1-2:1	AC068473.1	7.87339	0.0154567	0.110498	14.7027	1.60629	7.06019	107.03	0.612368	76.8925
lnc-AC068473.1-2:10	AC068473.1	6.96479	0.0491407	0.196958	6.56538	1.02219	0	31.1737	6.12368	16.0545
lnc-AC068473.1-2:2	AC068473.1	-4.456	0.40136	0.638101	0	0	3.04557	0.519561	0	0
lnc-AC068473.1-2:3	AC068473.1	-158.473	0.0249346	0.139423	1.29458	7.1553	0	0	0	0
lnc-AC069257.9.1-14:1	AC069257.9.1	-145.104	0.0161984	0.11302	1.10964	4.9649	1.66122	0	0	0
lnc-AC069257.9.1-7:1	AC069257.9.1	-2.30913	0.583414	0.788494	1.38705	0	5.81428	2.85759	0	0
lnc-AC069257.9.1-8:1	AC069257.9.1	-1244.59	9.85158e-08	0.000132661	29.5904	17.0851	19.9347	0	0	0
lnc-AC073043.2.1-1:2	AC073043.2.1	8.48959	0.0910914	0.270661	3.6988	1.75232	0	30.6541	0	16.0545
lnc-AC073343.1-2:1	AC073343.1	-1.73445	0.642439	0.829099	5.82562	1.46027	0	3.11737	0	0.844973
lnc-AC073343.1-5:1	AC073343.1	-137.591	0.0136495	0.103844	2.40422	1.31424	3.59931	0	0	0
lnc-AC073416.2-10:1	AC073416.2	-9.81638	0.0494319	0.19764	3.97621	2.7745	6.78332	1.03912	0	0
lnc-AC073416.2-11:2	AC073416.2	1.40533	0.681158	0.854207	5.36327	3.50464	5.95271	17.6651	0	2.53492
lnc-AC073416.2-9:1	AC073416.2	-3.02064	0.267284	0.504096	7.85996	4.52682	1.79966	4.15649	0	0
lnc-AC073610.5.1-1:2	AC073610.5.1	-1.802	0.615796	0.810905	0.924701	3.94272	0.27687	0	0.612368	2.53492
lnc-AC073624.1.1-3:3	AC073624.1.1	1.19018	0.885685	0.956258	1.29458	1.89834	0.553741	0.519561	0	4.22487
lnc-AC074091.13.1-2:1	AC074091.13.1	-78.1251	0.000145492	0.00969899	28.6657	6.86325	8.58298	0	0.612368	0
lnc-AC074212.3.1-1:4	AC074212.3.1	47.263	0.061795	0.220608	0	0	0	2.33802	0	0
lnc-AC078802.1-2:1	AC078802.1	5.06697	0.099521	0.28405	0	5.69503	6.50645	11.4303	20.2081	30.419
lnc-AC078802.1-2:3	AC078802.1	-101.499	0.0665489	0.228726	5.36327	0	0	0	0	0
lnc-AC079135.1.1-1:2	AC079135.1.1	7.47053	0.107222	0.296601	0	2.04437	0.27687	12.2097	0	5.06984
lnc-AC079341.1-10:1	AC079341.1	14.9103	0.000174898	0.0108508	21.8229	8.46954	13.1513	397.984	38.5792	212.088
lnc-AC079341.1-4:2	AC079341.1	-5.90332	0.132292	0.33257	0.36988	4.08874	6.92176	1.55868	0	0
lnc-AC079341.1-5:1	AC079341.1	3.42806	0.259132	0.49398	18.494	0	0.969046	25.7183	0	41.4037
lnc-AC083864.4.1-3:1	AC083864.4.1	-89.7761	0.027314	0.145712	1.75693	1.75232	1.24592	0	0	0
lnc-AC084851.1-9:1	AC084851.1	2.68091	0.351836	0.591496	0.832231	2.1904	0.138435	5.19561	0.612368	2.53492
lnc-AC090186.1-1:6	AC090186.1	1.64026	0.693272	0.860176	1.38705	0	0	2.07824	0	0
lnc-AC091132.2-7:1	AC091132.2	8.99615	0.0303723	0.152949	1.10964	2.1904	0	23.1205	0.612368	5.91481
lnc-AC091132.2-7:2	AC091132.2	-4.92749	0.16089	0.371092	5.45574	3.21258	1.93809	0	0	2.53492
lnc-AC091172.1-3:1	AC091172.1	-6.82276	0.102902	0.289769	1.8494	2.33642	5.1221	0	0	1.68995
lnc-AC091172.1-4:1	AC091172.1	-1.99012	0.640518	0.827756	4.43856	1.46027	0.830611	3.11737	0	0
lnc-AC092031.1-3:1	AC092031.1	-6.9451	0.133078	0.333587	0.647291	2.1904	12.736	0	0	2.53492
lnc-AC092171.1-1:2	AC092171.1	1.63076	0.69114	0.859241	5.08586	2.33642	0	7.01407	0	5.06984
lnc-AC092327.1-3:4	AC092327.1	-20.2952	0.221557	0.448105	1.01717	0	0	0	0	0
lnc-AC092329.1-1:12	AC092329.1	-1	1	1	0	0	0	0	0	0
lnc-AC092329.1-1:3	AC092329.1	-3.61522	0.23858	0.469009	8.0449	9.63775	1.93809	2.07824	0	3.37989
lnc-AC092811.1-1:1	AC092811.1	-6.85505	0.189787	0.410881	1.29458	0.292053	3.04557	0	0	0.844973
lnc-AC099552.4.1-4:1	AC099552.4.1	-3.80848	0.171062	0.384947	10.7265	7.1553	3.73775	0.259781	0	5.91481
lnc-AC102948.1.1-4:1	AC102948.1.1	-10.569	0.000365808	0.016529	93.3948	211.3	453.79	16.626	20.8205	34.6439
lnc-AC102948.1.1-4:2	AC102948.1.1	-4.19568	0.0209597	0.128643	287.859	802.416	1172.41	91.4427	270.667	177.444
lnc-AC105337.1-1:1	AC105337.1	-3.7853	0.168056	0.380984	8.69219	2.48245	1.38435	1.55868	0	1.68995
lnc-AC106017.3.1-3:1	AC106017.3.1	-1.99915	0.421331	0.657737	3.32892	6.27914	3.18401	3.63693	0	2.53492
lnc-AC108134.2-1:1	AC108134.2	1.18855	0.869271	0.948708	2.21928	0.292053	2.3534	1.03912	0	5.06984
lnc-AC108938.5.1-1:10	AC108938.5.1	33.1141	0.00307022	0.0482722	0.27741	2.04437	0	54.0343	7.34841	16.0545
lnc-AC108938.5.1-4:1	AC108938.5.1	-15.1907	0.0692927	0.233741	0.739761	2.92053	2.7687	0.259781	0	0
lnc-AC109486.1-4:1	AC109486.1	-17.5033	0.0160366	0.112356	5.82562	3.94272	3.87618	0.519561	0	0
lnc-AC110080.1-4:44	AC110080.1	1.99794	0.402085	0.638801	13.2232	4.67285	19.3809	0.259781	61.8491	12.6746
lnc-AC110373.1-8:2	AC110373.1	-1.21127	0.874183	0.950935	3.23645	1.89834	0.969046	4.67605	0	0
lnc-AC110781.3.1-3:1	AC110781.3.1	-1.6405	0.577038	0.783622	8.22984	2.33642	8.02924	9.87166	0	0.844973
lnc-AC111170.3.1-1:2	AC111170.3.1	1.83884	0.624673	0.818114	6.01056	0	0.138435	2.59781	7.96078	0.844973
lnc-AC111170.3.1-1:5	AC111170.3.1	-25.4202	0.220785	0.447082	1.29458	0	0	0	0	0
lnc-AC114772.1-4:1	AC114772.1	2.13621	0.364581	0.600618	2.58916	2.04437	6.09115	2.33802	16.5339	4.22487
lnc-AC114783.1.1-2:1	AC114783.1.1	-14.4418	0.0800193	0.252115	2.12681	6.13311	1.66122	0	0	0.844973
lnc-AC114783.1.1-4:2	AC114783.1.1	1.04882	0.957126	0.986451	14.5178	8.32351	2.07653	5.45539	2.44947	18.5894
lnc-AC114783.1.1-6:1	AC114783.1.1	3.73524	0.434732	0.667057	1.66446	0	0	6.23473	0	0
lnc-AC115989.1.1-5:1	AC115989.1.1	-122.76	0.0199751	0.12585	1.29458	4.9649	0.27687	0	0	0
lnc-AC120194.1-3:1	AC120194.1	-3.33164	0.224402	0.451823	2.68163	1.02219	3.87618	1.81846	0	0
lnc-AC125494.1-2:1	AC125494.1	-4.23405	0.219364	0.445812	2.7741	8.76159	1.93809	0.779342	0	2.53492
lnc-AC127496.1-1:1	AC127496.1	-1.13921	0.894109	0.961054	7.67502	9.78378	0.415305	12.7292	0	2.53492
lnc-AC127496.3-5:1	AC127496.3	-5.1895	0.247017	0.479347	5.08586	0.146027	0	0.779342	0	0
lnc-AC127496.3-8:2	AC127496.3	-12.6285	0.0793349	0.251016	4.43856	2.7745	1.24592	0	0	0.844973
lnc-AC130352.1-2:13	AC130352.1	-8.7759	0.0123308	0.0984856	25.6142	5.40298	2.21496	3.11737	0	0
lnc-AC130352.1-2:14	AC130352.1	-7.84267	0.172553	0.38679	4.71598	0	13.8435	2.07824	0	0
lnc-AC130352.1-2:24	AC130352.1	-1.3575	0.705443	0.86923	10.9115	2.62848	1.93809	8.57276	0.612368	1.68995
lnc-AC130352.1-2:26	AC130352.1	-91.4802	0.0327548	0.159579	1.38705	0	3.46088	0	0	0
lnc-AC130352.1-2:27	AC130352.1	-2.68438	0.550527	0.764611	4.16115	2.1904	0	0	0	2.53492
lnc-AC130352.1-2:36	AC130352.1	-2.93423	0.120104	0.314533	19.6037	15.4788	23.534	1.55868	10.4103	8.44973
lnc-AC130352.1-3:1	AC130352.1	-4.48964	0.152691	0.360696	6.1955	4.23477	4.56836	2.85759	0	0
lnc-AC131097.4.1-4:1	AC131097.4.1	6.85891	0.131774	0.331429	3.05151	0	0	20.5227	0.612368	0
lnc-AC131097.4.1-5:1	AC131097.4.1	-30.6736	0.131713	0.331398	0	1.60629	0	0	0	0
lnc-AC135178.1-1:1	AC135178.1	-3.14458	0.147063	0.353962	7.30514	15.4788	4.01462	2.85759	3.06184	2.53492
lnc-AC135352.1-1:2	AC135352.1	-3.36191	0.369104	0.604519	1.38705	2.04437	0	0.779342	0	0
lnc-AC135724.1.1-2:1	AC135724.1.1	-5.39866	0.386383	0.622396	2.95904	0	1.10748	0	0	0.844973
lnc-AC136428.1.1-2:2	AC136428.1.1	-2.55785	0.409796	0.646626	3.97621	2.92053	14.2588	7.79342	0	0
lnc-AC138647.1.1-6:1	AC138647.1.1	1.49606	0.787914	0.911673	2.86657	0	0	2.59781	0	1.68995
lnc-AC138969.4.1-1:1	AC138969.4.1	-3.27726	0.407175	0.644151	1.47952	3.06656	0.27687	0	0	1.68995
lnc-ACAA1-4:1	ACAA1	-53.7468	0.0607544	0.218866	1.29458	0	1.52279	0	0	0
lnc-ACACA-1:10	ACACA	4.32454	0.190219	0.411286	0.739761	3.35861	0	10.9108	0	6.75978
lnc-ACACA-4:1	ACACA	-31.0346	0.109323	0.299724	1.29458	0.292053	0	0	0	0
lnc-ACACA-5:1	ACACA	1.25885	0.899579	0.962737	0	2.1904	0	2.59781	0	0
lnc-ACACA-5:7	ACACA	-2.3416	0.511634	0.733411	5.36327	2.33642	0	1.55868	0	1.68995
lnc-ACAD10-1:1	ACAD10	-1.69698	0.72397	0.880031	0.832231	1.75232	0	1.2989	0	0
lnc-ACHE-6:1	ACHE	-1.17084	0.909636	0.967242	0.832231	0.584106	1.24592	0	0	2.53492
lnc-ACOT1-3:1	ACOT1	-3.37071	0.26124	0.496571	6.84279	4.3808	2.63027	0.259781	0	4.22487
lnc-ACOT12-8:1	ACOT12	-85.574	0.0453883	0.188642	1.75693	2.7745	0	0	0	0
lnc-ACOXL-4:1	ACOXL	-4.90356	0.0168434	0.114083	19.9735	37.6748	38.2081	10.1314	5.51131	3.37989
lnc-ACP1-1:1	ACP1	2.05178	0.671179	0.847806	0	0	0.692176	1.2989	0	0
lnc-ACP1-10:1	ACP1	178.911	0.00080952	0.024775	0	0	0	9.09232	0	0
lnc-ACTG1-1:1	ACTG1	-16.1939	0.188338	0.409207	0.647291	0.146027	0	0	0	0
lnc-ACTG1-2:2	ACTG1	-2.42061	0.286111	0.524901	11.8362	72.2831	51.6363	0	36.1297	20.2794
lnc-ACTG1-2:3	ACTG1	1.12943	0.914891	0.970158	15.6274	1.75232	0	11.9499	0	7.60476
lnc-ACTG1-3:1	ACTG1	19.1807	0.00110875	0.0288794	2.21928	2.92053	2.21496	71.6994	13.4721	56.6132
lnc-ACTL10-1:1	ACTL10	27.0771	0.0215095	0.130299	0	0.876159	0	20.0031	0	4.22487
lnc-ACTL7B-2:1	ACTL7B	1.02678	0.974271	0.992986	1.29458	12.1202	15.7816	2.07824	14.6968	13.5196
lnc-ACTN1-2:1	ACTN1	-245.494	0.0270953	0.145274	1.20211	0	11.9054	0	0	0
lnc-ACTR10-4:1	ACTR10	1.34304	0.663275	0.843405	14.7952	13.1424	11.6286	3.63693	35.5173	14.3645
lnc-ACTR1A-1:1	ACTR1A	3.32316	0.155169	0.363686	1.66446	6.42517	1.52279	2.07824	18.371	11.8296
lnc-ACTR1B-5:1	ACTR1B	-7.74022	0.118366	0.312171	1.75693	5.25695	4.01462	0	0	1.68995
lnc-ACVR2A-4:2	ACVR2A	3.61567	0.0852065	0.26058	11.2814	11.244	21.4574	97.9373	6.73605	54.0783
lnc-ACY1-2:1	ACY1	-2.61763	0.175436	0.389785	10.0792	11.9742	53.0207	3.89671	14.0845	10.9846
lnc-ACYP1-1:1	ACYP1	1.24124	0.791812	0.913045	12.2061	7.00927	6.64489	19.2238	0	12.6746
lnc-ACYP2-1:1	ACYP2	198.759	0.00285682	0.0459369	0	0	0	3.89671	0	6.75978
lnc-ACYP2-1:3	ACYP2	-3.33575	0.126361	0.324536	23.3949	15.7709	13.4282	7.27385	0	8.44973
lnc-ACYP2-3:1	ACYP2	-1.29732	0.798226	0.916204	1.01717	2.04437	12.1823	4.41627	3.06184	4.22487
lnc-ACYP2-6:1	ACYP2	-4.97162	0.166963	0.379149	4.06868	10.2219	2.21496	1.55868	0	1.68995
lnc-ADA-1:20	ADA	-1.8468	0.672002	0.848413	0.647291	0	3.18401	1.81846	0	0
lnc-ADAM10-7:1	ADAM10	-64.6561	0.0528698	0.202823	0.647291	2.7745	0	0	0	0
lnc-ADAM17-1:1	ADAM17	-155.421	0.00712367	0.0755305	6.1955	2.04437	0	0	0	0
lnc-ADAM19-1:1	ADAM19	-3.4589	0.44103	0.673779	1.94187	2.7745	0	0	0.612368	0.844973
lnc-ADAM8-3:1	ADAM8	-1.61471	0.538879	0.756047	6.56538	9.63775	19.104	0.519561	14.0845	7.60476
lnc-ADAMTS12-2:2	ADAMTS12	-3.94892	0.0661265	0.227972	23.21	27.1609	22.1496	12.7292	0	5.06984
lnc-ADAMTS20-3:1	ADAMTS20	-1.10942	0.930274	0.975747	2.95904	0	2.21496	2.85759	0	1.68995
lnc-ADAMTSL4-2:1	ADAMTSL4	-83.8266	0.048702	0.196002	1.10964	0.146027	3.18401	0	0	0
lnc-ADAMTSL4-4:1	ADAMTSL4	-2.22811	0.362056	0.598215	10.5416	3.79669	5.81428	1.81846	0	7.60476
lnc-ADAMTSL4-7:1	ADAMTSL4	-7.68303	0.0326788	0.15944	3.88374	7.7394	16.4738	1.55868	1.8371	0
lnc-ADAMTSL5-1:2	ADAMTSL5	11.0543	0.00113465	0.029048	11.0039	5.98709	4.70679	143.659	12.2474	84.4973
lnc-ADAP1-3:1	ADAP1	2.24136	0.430965	0.663857	0.647291	5.54901	5.67584	17.9249	0	8.44973
lnc-ADAP2-1:1	ADAP2	-13.7307	0.0229559	0.134709	4.90092	0.730133	5.1221	0.519561	0	0
lnc-ADAP2-3:1	ADAP2	-2.45335	0.251751	0.484828	12.391	7.7394	3.73775	1.55868	1.8371	6.75978
lnc-ADAP2-4:2	ADAP2	-1.11784	0.921183	0.972151	3.05151	0.146027	0.692176	3.11737	0	0
lnc-ADAT1-1:1	ADAT1	-11.3718	0.0121191	0.0983252	9.98677	13.4344	3.04557	1.81846	0	0
lnc-ADAT3-1:1	ADAT3	7.92939	0.00827852	0.0814203	5.91809	1.89834	1.38435	41.8247	17.1463	14.3645
lnc-ADC-3:1	ADC	-2.88016	0.385064	0.621248	6.56538	3.21258	0.27687	3.11737	0	0
lnc-ADCK3-4:1	ADCK3	1.84002	0.500356	0.723434	4.16115	1.02219	1.52279	4.93583	0	7.60476
lnc-ADCK5-3:1	ADCK5	-169.353	0.00715129	0.0755881	5.64068	3.35861	0	0	0	0
lnc-ADCY9-1:10	ADCY9	-4.87281	0.0522818	0.202087	22.3778	10.806	10.5211	1.55868	7.34841	0
lnc-ADCYAP1-2:1	ADCYAP1	-1.36882	0.663843	0.843518	14.9802	6.27914	4.29149	7.79342	0	10.9846
lnc-ADCYAP1-6:1	ADCYAP1	14.3503	0.0436903	0.185946	0	0.43808	0	1.03912	0	5.91481
lnc-ADD1-2:2	ADD1	12.1242	0.0230082	0.134709	0.0924701	0.146027	0.692176	1.2989	7.96078	2.53492
lnc-ADD1-2:5	ADD1	-8.78553	0.182547	0.400336	1.10964	2.48245	0	0.259781	0	0
lnc-ADH5-6:1	ADH5	-124.371	0.0391185	0.174934	1.94187	4.67285	0	0	0	0
lnc-ADI1-4:2	ADI1	-2.46143	0.562939	0.774314	1.47952	0	8.44454	0	0	4.22487
lnc-ADIPOQ-3:1	ADIPOQ	-2.757	0.464538	0.693204	0.27741	0.876159	0	0.259781	0	0
lnc-ADORA2A-1:5	ADORA2A	4.77343	0.315626	0.556749	0	1.16821	0	3.11737	0	2.53492
lnc-ADRA2A-4:1	ADRA2A	-2.40121	0.354112	0.592949	22.4702	3.94272	17.9966	5.19561	0	13.5196
lnc-ADRB2-1:1	ADRB2	-2.22257	0.490009	0.714583	4.34609	6.42517	1.52279	0	0	5.91481
lnc-ADRBK2-2:1	ADRBK2	-2.07451	0.222975	0.450432	22.2853	12.7043	9.55202	8.0532	7.34841	5.91481
lnc-ADRM1-1:1	ADRM1	-63.6861	0.0525333	0.20235	0.739761	2.62848	0	0	0	0
lnc-AES-1:4	AES	-1.45164	0.769524	0.902789	1.29458	5.11093	3.59931	0	3.67421	3.37989
lnc-AES-2:7	AES	4.54007	0.460979	0.689733	1.01717	0	0	0	4.89894	0
lnc-AF127577.1-9:1	AF127577.1	-134.45	0.0110262	0.0936185	3.51386	0.43808	3.18401	0	0	0
lnc-AFAP1L1-3:1	AFAP1L1	1.45637	0.79251	0.913537	0.554821	2.1904	0	0.779342	0	3.37989
lnc-AGAP1-5:1	AGAP1	1.6503	0.599771	0.799034	8.87713	0	2.07653	10.651	0.612368	6.75978
lnc-AGL-2:1	AGL	-2.22398	0.424196	0.659911	5.2708	2.33642	3.18401	0	1.8371	3.37989
lnc-AGMAT-1:1	AGMAT	-35.7153	0.0836644	0.258455	0	1.60629	0.27687	0	0	0
lnc-AGMAT-1:2	AGMAT	-132.205	0.00706905	0.0750724	1.01717	1.46027	4.56836	0	0	0
lnc-AGMAT-7:1	AGMAT	-12.575	0.0589843	0.215603	3.6988	2.92053	1.52279	0	0	0.844973
lnc-AGPAT5-4:1	AGPAT5	1.7149	0.70017	0.864841	0	1.31424	0	0	0	2.53492
lnc-AGPAT6-3:1	AGPAT6	1.31022	0.842994	0.936277	3.14398	0	0	3.89671	0	0
lnc-AGPHD1-3:1	AGPHD1	-160.221	0.00462479	0.0588634	4.62351	0.146027	3.73775	0	0	0
lnc-AGR3-1:1	AGR3	1.33847	0.763161	0.898315	1.38705	0.730133	11.6286	11.4303	0	6.75978
lnc-AGRP-1:4	AGRP	158.954	0.000923625	0.0265255	0	0	0	6.49451	0	1.68995
lnc-AGRP-4:2	AGRP	6.27739	0.0737898	0.240572	4.71598	0.876159	1.10748	29.615	0	12.6746
lnc-AGRP-5:1	AGRP	1.45691	0.793218	0.913727	1.94187	0.146027	0	2.85759	0	0
lnc-AHR-6:1	AHR	-5.55587	0.177811	0.393169	1.75693	5.69503	1.52279	1.2989	0	0
lnc-AHSA2-5:1	AHSA2	2.51412	0.457156	0.686753	3.14398	0.876159	0	9.87166	0	0
lnc-AHSP-3:1	AHSP	-1.23038	0.864587	0.946701	1.10964	3.06656	0.27687	0	3.67421	0
lnc-AIFM3-1:1	AIFM3	-114.045	0.0500735	0.198671	2.86657	0	3.18401	0	0	0
lnc-AIFM3-1:3	AIFM3	6.90872	0.0755377	0.243601	4.80845	1.75232	0	24.6791	0	21.1243
lnc-AIFM3-2:1	AIFM3	-4.09422	0.327685	0.569957	1.75693	6.27914	1.66122	2.07824	0	0
lnc-AIPL1-6:1	AIPL1	-3.92546	0.406886	0.643996	3.79127	0	0	0.779342	0	0
lnc-AJUBA-1:1	AJUBA	-4.23744	0.296889	0.537073	2.49669	0.146027	0.415305	0.519561	0	0
lnc-AJUBA-2:1	AJUBA	-2.2314	0.510302	0.732762	2.21928	0	7.33706	3.89671	0	0
lnc-AKAP1-4:3	AKAP1	-83.7637	7.88901e-05	0.00711726	17.0145	17.3772	15.6432	0	0	0.844973
lnc-AKAP10-1:1	AKAP10	1.58582	0.78489	0.909581	2.86657	0	0	4.41627	0	0
lnc-AKAP10-1:2	AKAP10	-55.1287	0.128435	0.327259	0	0	2.90714	0	0	0
lnc-AKAP11-1:2	AKAP11	-7.51554	0.0373691	0.170349	9.8943	13.2884	3.18401	0	0.612368	3.37989
lnc-AKAP12-1:1	AKAP12	-5.26658	0.0249525	0.139423	41.1492	34.6083	16.1969	3.63693	0	14.3645
lnc-AKAP4-2:4	AKAP4	-10.8226	0.0280341	0.14781	12.2985	4.81887	7.33706	1.81846	0	0
lnc-AKAP4-3:1	AKAP4	-90.4114	0.0246997	0.138817	1.29458	3.50464	0	0	0	0
lnc-AKAP8-4:1	AKAP8	-3.33799	0.375118	0.610507	6.47291	1.60629	0	0.779342	0	1.68995
lnc-AKAP9-1:2	AKAP9	22.7242	0.0077936	0.0784991	0.27741	0.876159	0	12.989	3.06184	10.9846
lnc-AKIRIN1-1:5	AKIRIN1	-2.06845	0.444956	0.677038	4.25362	2.1904	3.32244	4.15649	0	0
lnc-AKIRIN1-3:1	AKIRIN1	-28.7858	0.0159962	0.112267	6.28797	0.292053	12.3207	0	0	0.844973
lnc-AKR1CL1-3:1	AKR1CL1	-7.62916	0.00491963	0.0614543	8.32231	35.3384	51.7747	3.89671	6.73605	1.68995
lnc-AKR1D1-5:1	AKR1D1	-6.8709	0.126431	0.324536	5.54821	0	1.66122	0.779342	0	0
lnc-AKR1D1-6:1	AKR1D1	-2.13524	0.514692	0.735146	1.10964	0.146027	3.18401	0.519561	0	1.68995
lnc-AKR1E2-11:1	AKR1E2	-2.91996	0.372152	0.607885	0.27741	1.60629	11.4901	2.33802	1.22474	0.844973
lnc-AKR7A2-2:1	AKR7A2	-1.80887	0.579693	0.785484	3.32892	3.50464	0.553741	0	1.8371	2.53492
lnc-AKT1-1:13	AKT1	2.21649	0.479911	0.705665	1.10964	0	1.93809	4.15649	0	2.53492
lnc-AKT1-2:1	AKT1	1.47522	0.727451	0.881808	1.10964	4.08874	0	5.71517	0	1.68995
lnc-AL031590.1-2:4	AL031590.1	1.45919	0.626042	0.818473	7.85996	14.8947	6.36802	0.779342	29.3937	12.6746
lnc-AL033381.1-3:1	AL033381.1	-13.5856	0.218606	0.445151	0.647291	0	0	0	0	0
lnc-AL033381.1-5:1	AL033381.1	-6.37355	0.100928	0.286731	4.43856	4.23477	1.93809	1.2989	0	0
lnc-AL035696.1-7:1	AL035696.1	-7.42185	0.267193	0.504067	2.03434	3.06656	0	0.519561	0	0
lnc-AL035696.1-8:1	AL035696.1	-280.727	0.00358668	0.0520455	5.82562	3.06656	6.09115	0	0	0
lnc-AL049840.1-2:1	AL049840.1	-3.48642	0.129522	0.32835	8.0449	17.6692	2.21496	2.33802	0	5.91481
lnc-AL078585.1-10:1	AL078585.1	-12.2768	0.00655708	0.0717867	6.56538	13.4344	8.99828	1.81846	0	0
lnc-AL136219.1-3:1	AL136219.1	-2.27048	0.551469	0.765145	4.06868	0	5.39897	3.11737	0	0.844973
lnc-AL137798.1-1:2	AL137798.1	-2.6197	0.111627	0.303775	43.9233	11.5361	49.2829	16.1064	11.0226	12.6746
lnc-AL137798.1-2:1	AL137798.1	-72.1123	0.0358288	0.166025	1.38705	1.31424	1.10748	0	0	0
lnc-AL137798.1-3:8	AL137798.1	-64.0585	0.0696501	0.234477	1.57199	0	1.79966	0	0	0
lnc-AL160314.1-2:1	AL160314.1	-3.53817	0.256505	0.490499	1.29458	8.03146	5.67584	0	4.28657	0
lnc-AL161915.1-2:1	AL161915.1	-2.55075	0.560181	0.772098	2.21928	3.79669	0	0	0	2.53492
lnc-AL162431.1-3:1	AL162431.1	-9.35295	0.116531	0.309603	12.5759	7.30133	0	1.81846	0	0
lnc-AL353597.1-1:3	AL353597.1	-290.696	0.000636485	0.0215349	10.5416	1.75232	3.18401	0	0	0
lnc-AL355149.1-3:1	AL355149.1	1.38157	0.73571	0.883162	6.93526	2.48245	1.52279	12.989	0	1.68995
lnc-AL355490.1-1:1	AL355490.1	-3.2584	0.110041	0.30106	84.2403	62.2073	31.0095	20.0031	0	34.6439
lnc-AL355490.1-1:2	AL355490.1	-4.91738	0.121427	0.316763	8.32231	3.35861	5.95271	0.519561	0	3.37989
lnc-AL391421.1-11:1	AL391421.1	-5.19979	0.146151	0.3527	1.57199	1.46027	7.06019	1.55868	0	0
lnc-AL391421.1-14:1	AL391421.1	-86.0552	0.0379628	0.171782	0.924701	3.50464	0.138435	0	0	0
lnc-AL391421.1-3:1	AL391421.1	22.5314	0.0103151	0.0911662	1.10964	0.146027	0	4.41627	15.9216	10.1397
lnc-AL445989.1-27:1	AL445989.1	-3.51168	0.0506198	0.19933	915.546	375.288	341.796	241.596	17.7587	205.328
lnc-AL450307.1-1:2	AL450307.1	-56.5027	0.142767	0.347632	2.95904	0	0	0	0	0
lnc-AL590822.1-2:1	AL590822.1	-1.18981	0.875185	0.950935	4.43856	1.31424	1.93809	2.33802	0	4.22487
lnc-AL590867.1-3:1	AL590867.1	2.36653	0.442256	0.674452	2.12681	3.79669	0	7.27385	0	6.75978
lnc-AL591845.1-1:1	AL591845.1	-94.8856	1.3081e-05	0.00214815	29.4055	7.30133	18.5503	0	0	0.844973
lnc-AL592284.1-1:27	AL592284.1	-7.26216	0.146411	0.353074	2.68163	0.584106	0.969046	0	0.612368	0
lnc-AL592284.1-3:1	AL592284.1	-1.83347	0.312268	0.552852	15.2576	25.5546	25.4721	13.7684	7.96078	14.3645
lnc-AL592284.1-4:1	AL592284.1	-1.17092	0.881888	0.954162	1.20211	2.7745	6.78332	1.03912	4.89894	3.37989
lnc-AL592284.1-6:1	AL592284.1	5.37834	0.162404	0.37307	3.51386	1.02219	0.138435	0	21.4329	4.22487
lnc-AL645728.1-3:1	AL645728.1	2.90063	0.499389	0.723319	1.94187	0.146027	0	4.41627	0	1.68995
lnc-AL669831.1-1:6	AL669831.1	-11.0001	0.226053	0.45379	0.36988	0.146027	0	0	0	0
lnc-AL669831.1-11:1	AL669831.1	-18.0644	0.000334358	0.0159487	22.2853	24.2404	91.7825	2.33802	1.22474	4.22487
lnc-AL669831.1-11:2	AL669831.1	-10.9504	0.000313076	0.0153864	390.409	956.62	2202.92	109.887	67.3605	147.025
lnc-AL669831.1-12:1	AL669831.1	-8.32696	0.000870044	0.0260937	217.027	567.313	1256.58	69.3614	82.0573	93.792
lnc-AL713998.1-2:2	AL713998.1	9.93636	0.133227	0.333835	2.03434	0	0	17.4053	0	3.37989
lnc-AL901608.1-3:39	AL901608.1	-1.36551	0.703588	0.867948	13.5006	3.21258	4.01462	3.11737	7.96078	4.22487
lnc-AL901608.1-3:8	AL901608.1	-20.4522	0.175089	0.389326	1.01717	0	0	0	0	0
lnc-AL928654.7.1-1:1	AL928654.7.1	-2.94281	0.374586	0.609955	11.8362	1.89834	0.138435	0	0	5.06984
lnc-ALB-1:2	ALB	-66.3681	0.0215685	0.130477	2.31175	1.02219	0.138435	0	0	0
lnc-ALDH1A1-7:1	ALDH1A1	1.58065	0.608733	0.804972	2.03434	7.00927	2.7687	3.89671	14.6968	0
lnc-ALDH1A2-5:2	ALDH1A2	148.994	0.015051	0.109201	0	0	0	0	7.96078	0
lnc-ALDH1A3-1:4	ALDH1A3	-6.48561	0.114468	0.307671	15.2576	2.04437	2.21496	0	0	3.37989
lnc-ALDH1L2-1:2	ALDH1L2	1.84677	0.653531	0.837022	0	3.06656	0	1.55868	0	4.22487
lnc-ALDH3B2-3:3	ALDH3B2	-1.63102	0.720558	0.877785	1.47952	7.7394	0	0	0	5.91481
lnc-ALG14-1:1	ALG14	-1.04422	0.948884	0.981516	12.9458	12.4123	12.736	10.1314	0.612368	26.1942
lnc-ALG1L-2:18	ALG1L	-3.29975	0.158806	0.368414	23.1175	4.81887	11.6286	11.1706	0	0
lnc-ALG1L-2:8	ALG1L	-208.935	0.0203394	0.127628	7.76749	3.35861	0	0	0	0
lnc-ALG3-1:1	ALG3	2.51119	0.335482	0.578385	6.93526	4.52682	4.98366	25.9781	0	15.2095
lnc-ALG3-2:1	ALG3	1.11528	0.858463	0.944758	32.2721	41.1795	79.6002	14.0281	120.636	36.3338
lnc-ALK-1:1	ALK	-5.40009	0.0461241	0.19029	27.6486	11.244	25.8874	1.55868	0	10.9846
lnc-ALPL-3:2	ALPL	2.75539	0.479747	0.705591	1.01717	0	0	1.2989	0	1.68995
lnc-ALS2CR11-2:1	ALS2CR11	-6.97717	0.0356868	0.165939	6.56538	2.62848	22.4265	2.59781	0	1.68995
lnc-ALX4-3:1	ALX4	-3.77775	0.237807	0.468312	3.97621	3.06656	0.553741	0	0.612368	1.68995
lnc-ALX4-7:2	ALX4	-2.7389	0.505484	0.727382	1.8494	0	0.830611	0.779342	0	0
lnc-ALX4-8:2	ALX4	-1.3205	0.843804	0.936432	0	2.62848	1.52279	2.85759	0	0
lnc-ALYREF-1:1	ALYREF	-35.19	0.129084	0.328338	0.0924701	1.75232	0	0	0	0
lnc-AMBP-1:1	AMBP	-2.80441	0.340502	0.581258	0.832231	4.52682	1.66122	2.07824	0	0
lnc-AMDHD1-3:1	AMDHD1	-16.9273	0.0448213	0.187559	0.27741	2.62848	19.5194	1.03912	0	0
lnc-AMDHD2-2:1	AMDHD2	-1.38511	0.806793	0.919551	1.66446	0.292053	0.553741	1.55868	0	0
lnc-AMIGO2-4:1	AMIGO2	-6.20503	0.0451161	0.188207	2.68163	13.1424	14.1204	3.63693	0.612368	0
lnc-AMOT-4:2	AMOT	-2.68322	0.164271	0.37582	19.6961	19.8596	12.1823	4.93583	1.22474	13.5196
lnc-AMOTL2-3:1	AMOTL2	1.4081	0.617018	0.811706	10.819	26.8689	45.2683	4.67605	66.1357	46.4735
lnc-AMPH-10:8	AMPH	1.25241	0.875005	0.950935	3.32892	0	3.18401	0	0	8.44973
lnc-AMZ1-3:1	AMZ1	-1.42456	0.857854	0.944397	2.03434	0	0	1.2989	0	0
lnc-AMZ2-5:2	AMZ2	-2.43276	0.233002	0.462437	77.305	29.4974	24.503	37.4084	0	16.0545
lnc-ANAPC10-6:1	ANAPC10	-2.06002	0.564436	0.775076	1.8494	5.69503	0.692176	0.779342	0	3.37989
lnc-ANAPC11-2:1	ANAPC11	1.49249	0.733527	0.883162	3.14398	1.89834	0	0.519561	0.612368	6.75978
lnc-ANAPC11-4:1	ANAPC11	-204.383	0.00623989	0.0694432	5.73315	3.21258	1.93809	0	0	0
lnc-ANAPC16-2:1	ANAPC16	-1.83309	0.382308	0.618896	12.391	20.0056	20.7653	3.63693	14.6968	10.9846
lnc-ANAPC7-3:1	ANAPC7	2.25784	0.54866	0.763546	1.10964	1.75232	0	4.67605	0	1.68995
lnc-ANGPT2-2:1	ANGPT2	2.33431	0.471662	0.699493	4.90092	0.730133	0.969046	13.5086	0	1.68995
lnc-ANGPTL2-2:3	ANGPTL2	352.002	0.00064364	0.0216681	0	0	0	12.7292	0	5.91481
lnc-ANK2-4:1	ANK2	1.6421	0.583372	0.788494	2.49669	1.46027	3.46088	0.519561	6.12368	5.91481
lnc-ANKDD1B-4:1	ANKDD1B	-2.41075	0.413857	0.650746	4.53103	3.06656	17.8581	0	7.34841	3.37989
lnc-ANKH-1:4	ANKH	-2.0773	0.598348	0.798208	1.75693	1.46027	0	1.2989	0	0
lnc-ANKLE2-2:1	ANKLE2	3.41638	0.22471	0.452118	4.80845	2.1904	0.138435	20.7824	0	3.37989
lnc-ANKRD12-1:7	ANKRD12	1.75875	0.577036	0.783622	2.68163	4.3808	0	4.15649	4.89894	3.37989
lnc-ANKRD18B-4:1	ANKRD18B	-23.0666	0.00745673	0.07766	2.68163	0.292053	28.9329	0.519561	0	0.844973
lnc-ANKRD18B-6:3	ANKRD18B	-6.13356	0.37418	0.609718	2.31175	0	0	0.259781	0	0
lnc-ANKRD20A1-8:1	ANKRD20A1	-1.46937	0.710345	0.872895	1.10964	0.730133	5.26053	3.63693	0	0.844973
lnc-ANKRD20A2-14:1	ANKRD20A2	-1.37212	0.787022	0.911111	9.33948	6.57119	0	11.1706	0	0
lnc-ANKRD20A2-3:1	ANKRD20A2	-1.6401	0.718602	0.876254	0.554821	0	2.90714	0	0.612368	1.68995
lnc-ANKRD20A2-6:1	ANKRD20A2	-1.3961	0.736642	0.883162	4.25362	1.16821	2.07653	4.15649	0	0.844973
lnc-ANKRD20A3-5:1	ANKRD20A3	-100.283	0.019199	0.12264	2.68163	2.62848	0	0	0	0
lnc-ANKRD20A3-6:1	ANKRD20A3	1.27819	0.841138	0.935942	0.18494	1.89834	0	2.33802	0	0
lnc-ANKRD20A3-8:1	ANKRD20A3	-144.488	0.00447017	0.0579565	2.49669	4.08874	1.10748	0	0	0
lnc-ANKRD23-2:2	ANKRD23	8.16807	0.022281	0.13276	1.57199	2.62848	3.87618	52.9952	0	12.6746
lnc-ANKRD26-5:1	ANKRD26	-592.893	3.57643e-05	0.00408138	8.22984	4.52682	18.9656	0	0	0
lnc-ANKRD27-1:1	ANKRD27	3.6871	0.305922	0.545707	1.20211	0	0	3.63693	0	0.844973
lnc-ANKRD27-2:6	ANKRD27	-1.61393	0.811073	0.919703	0	0	3.18401	1.81846	0	0
lnc-ANKRD27-2:7	ANKRD27	2.79185	0.502953	0.725291	0.462351	0	0	0	0	1.68995
lnc-ANKRD29-1:1	ANKRD29	-5.83446	0.10371	0.290967	3.42139	31.6878	14.1204	3.37715	0	5.06984
lnc-ANKRD30A-11:1	ANKRD30A	-1.87524	0.61658	0.811499	1.94187	5.54901	0	0	2.44947	1.68995
lnc-ANKRD30A-5:4	ANKRD30A	-2.04754	0.359981	0.59669	11.8362	7.7394	5.1221	0.519561	3.67421	8.44973
lnc-ANKRD30BL-3:1	ANKRD30BL	-2.74031	0.323151	0.565284	28.2034	1.60629	1.66122	10.9108	0	0
lnc-ANKRD33B-1:1	ANKRD33B	-5.90608	0.0584326	0.214635	8.41478	3.79669	13.5666	1.81846	0	2.53492
lnc-ANKRD33B-10:1	ANKRD33B	13.6163	0.0124659	0.0988611	2.7741	0	2.07653	36.8888	18.9834	10.9846
lnc-ANKRD33B-2:1	ANKRD33B	-1.26475	0.858137	0.944554	1.01717	5.98709	0	2.33802	3.06184	0
lnc-ANKRD34B-2:1	ANKRD34B	-12.3803	0.113695	0.30647	5.08586	0	0	0.259781	0	0
lnc-ANKRD34B-3:1	ANKRD34B	-24.4156	0.0017596	0.0357767	22.3778	20.5897	6.78332	0	0	2.53492
lnc-ANKRD34B-4:1	ANKRD34B	-8.45132	0.0012428	0.0300999	4806.04	8975.23	21800.5	827.661	1860.99	1521.8
lnc-ANKRD36-4:1	ANKRD36	-42.8483	0.113979	0.306967	2.21928	0	0	0	0	0
lnc-ANKRD42-2:1	ANKRD42	-11.6805	0.0379545	0.171782	5.91809	8.46954	1.52279	0	0	1.68995
lnc-ANKRD54-3:2	ANKRD54	1.61231	0.732072	0.883162	3.97621	0.876159	0.138435	5.45539	0	2.53492
lnc-ANKRD55-6:1	ANKRD55	-2.40753	0.334127	0.577137	4.80845	12.1202	1.93809	1.2989	4.89894	1.68995
lnc-ANKRD56-5:1	ANKRD56	-1.14277	0.888361	0.958076	12.7609	7.30133	0.27687	14.8075	0	2.53492
lnc-ANKRD56-7:1	ANKRD56	-1.96615	0.558833	0.77118	0.18494	1.89834	4.15305	0	2.44947	0.844973
lnc-ANKRD56-7:2	ANKRD56	-2.32904	0.426478	0.662088	5.54821	9.19967	4.56836	0	6.73605	1.68995
lnc-ANKRD65-3:4	ANKRD65	-63.561	0.0857443	0.261466	3.32892	0	0	0	0	0
lnc-ANKRD65-3:9	ANKRD65	-85.753	0.0400428	0.176908	2.58916	0	1.93809	0	0	0
lnc-ANKRD65-4:2	ANKRD65	1.88652	0.594353	0.794635	5.82562	0.292053	0.415305	7.27385	0	5.06984
lnc-ANKRD9-1:1	ANKRD9	-2.02376	0.42196	0.65831	17.1994	3.21258	4.84523	5.71517	0	6.75978
lnc-ANKS3-1:5	ANKS3	-65.3374	0.0741087	0.24105	3.42139	0	0	0	0	0
lnc-ANKS6-3:1	ANKS6	-1.73131	0.728984	0.881985	2.21928	0	0.830611	1.55868	0	0
lnc-ANKUB1-1:1	ANKUB1	-237.163	0.00573815	0.066612	8.87713	2.92053	0.830611	0	0	0
lnc-ANO10-5:1	ANO10	-1.9249	0.671395	0.847806	1.8494	1.02219	0	0	0	1.68995
lnc-ANO6-1:1	ANO6	29.6908	0.000453692	0.0180752	2.21928	0	0.692176	42.8638	10.4103	36.3338
lnc-ANO7-3:2	ANO7	-1.15646	0.894809	0.961345	5.64068	1.31424	0.138435	5.71517	0	0
lnc-ANO9-1:1	ANO9	-7.12465	0.0380822	0.172086	14.0555	9.63775	5.53741	2.85759	0	0.844973
lnc-ANP32A-3:2	ANP32A	1.58628	0.670701	0.847725	4.34609	3.79669	0	11.6901	0	0.844973
lnc-ANXA11-1:1	ANXA11	1.37841	0.834422	0.932785	0	2.04437	0	2.59781	0	0
lnc-ANXA4-1:2	ANXA4	2.62346	0.448349	0.679302	2.21928	0	3.46088	12.2097	0	2.53492
lnc-ANXA7-2:1	ANXA7	-13.7089	0.196958	0.419791	0.647291	0	0	0	0	0
lnc-AOX1-2:1	AOX1	-6.99238	0.0862534	0.262322	9.52442	1.46027	4.01462	0	0	2.53492
lnc-AP000295.9.1-1:2	AP000295.9.1	359.72	0.000102382	0.00792343	0	0	0	9.87166	0	9.2947
lnc-AP000350.10.1-1:1	AP000350.10.1	-2.83387	0.39494	0.631173	4.71598	1.31424	4.98366	0	0	4.22487
lnc-AP000892.4.1-3:1	AP000892.4.1	1.37247	0.75763	0.894974	0.924701	1.16821	0.830611	0	1.8371	2.53492
lnc-AP001496.1-16:1	AP001496.1	-1.64423	0.75416	0.893343	1.66446	2.1904	0	0	0	2.53492
lnc-AP002478.1-10:2	AP002478.1	-2.15644	0.55963	0.771654	3.05151	3.35861	2.7687	0	4.28657	0
lnc-AP003068.23.1-1:1	AP003068.23.1	-57.2703	0.054741	0.206188	1.20211	0.146027	1.66122	0	0	0
lnc-AP006621.5.1-2:2	AP006621.5.1	-1.41729	0.717747	0.876103	5.2708	10.5139	2.63027	0.779342	12.2474	0
lnc-AP2B1-1:1	AP2B1	-8.32264	0.188735	0.409524	1.57199	0	4.29149	0	0	0.844973
lnc-AP3B2-1:1	AP3B2	-70.4259	0.0605733	0.218798	2.68163	1.02219	0	0	0	0
lnc-AP3D1-1:1	AP3D1	-1.69984	0.614685	0.810076	1.47952	3.94272	0.969046	1.2989	0	2.53492
lnc-AP3M1-4:1	AP3M1	-8.55935	0.00176413	0.0357767	49.4715	38.9891	30.0404	1.2989	5.51131	7.60476
lnc-AP3M2-2:1	AP3M2	-14.336	0.00236633	0.0413831	12.6684	12.9964	11.767	1.55868	0.612368	0
lnc-AP3S1-15:1	AP3S1	-1.39713	0.809368	0.919703	3.14398	0	0	0	0	2.53492
lnc-AP3S1-4:4	AP3S1	2.05568	0.518691	0.738753	4.90092	2.62848	0	13.5086	0	1.68995
lnc-AP3S1-6:1	AP3S1	1.19016	0.839693	0.935307	8.0449	3.21258	2.21496	14.5477	0	0.844973
lnc-APBA2-1:8	APBA2	-8.22668	0.126415	0.324536	3.88374	7.30133	8.85985	0.779342	0	1.68995
lnc-APBA2-5:4	APBA2	6.57667	0.13814	0.340445	0.647291	1.46027	0.138435	12.2097	0	2.53492
lnc-APBA2-5:5	APBA2	9.34818	0.0221347	0.132405	1.66446	0.730133	7.33706	51.4365	0	39.7137
lnc-APBB1IP-1:11	APBB1IP	1.9312	0.725151	0.880671	1.10964	0	0	2.07824	0	0
lnc-APBB1IP-1:9	APBB1IP	-3.83818	0.477332	0.704335	2.12681	0.730133	0	0	0	0.844973
lnc-APEX1-3:1	APEX1	-17.1964	0.0296733	0.151817	2.21928	7.1553	1.66122	0	0	0.844973
lnc-APH1B-1:1	APH1B	-1.64684	0.628924	0.820489	6.65785	0.146027	5.39897	4.67605	0	2.53492
lnc-API5-12:1	API5	-1.59285	0.437236	0.669374	104.121	55.6361	86.2451	93.7808	8.57315	51.5434
lnc-APOB-13:2	APOB	-3.83494	0.153654	0.361226	4.90092	9.78378	3.18401	0.779342	0	4.22487
lnc-APOL2-2:2	APOL2	2.67241	0.339577	0.580749	1.01717	8.90762	0.138435	17.1455	8.57315	0.844973
lnc-APOL2-4:1	APOL2	-1.22363	0.804087	0.918703	1.29458	7.44735	12.8745	2.33802	7.96078	7.60476
lnc-APOL6-2:1	APOL6	-231.149	0.00210562	0.0386298	4.99339	5.25695	2.07653	0	0	0
lnc-APPL2-4:1	APPL2	-225.713	0.00762205	0.0781188	1.10964	5.54901	5.39897	0	0	0
lnc-APRT-1:1	APRT	-33.3529	0.162839	0.373431	1.57199	0.146027	0	0	0	0
lnc-APTX-2:2	APTX	-1	1	1	0	0	0	0	0	0
lnc-AQP11-4:1	AQP11	1.28242	0.726992	0.881635	13.963	3.35861	3.32244	17.6651	4.89894	3.37989
lnc-AQP2-1:4	AQP2	-15.7897	0.0342506	0.162599	10.7265	2.62848	3.04557	0.259781	0	0.844973
lnc-AQP8-2:1	AQP8	16.0019	0.00513297	0.0624935	1.75693	1.02219	2.3534	50.6572	0	32.109
lnc-AQP9-1:2	AQP9	2.58885	0.310826	0.551314	2.31175	4.23477	1.52279	5.19561	0	16.0545
lnc-ARC-1:11	ARC	-3.3013	0.323096	0.565284	4.43856	1.02219	11.3517	4.67605	0	0
lnc-ARC-1:5	ARC	-1.02178	0.987049	0.999519	2.7741	0.730133	0.27687	2.85759	0.612368	0
lnc-ARF1-3:1	ARF1	-3.81442	0.113514	0.306451	9.80183	10.6599	7.61393	5.19561	0	1.68995
lnc-ARF3-1:1	ARF3	158.956	0.000174875	0.0108508	0	0	0	1.03912	1.8371	5.91481
lnc-ARF4-2:1	ARF4	1.08233	0.926963	0.973824	3.14398	6.27914	1.79966	1.03912	5.51131	5.91481
lnc-ARF6-1:2	ARF6	-1.2854	0.844357	0.936527	0.462351	3.79669	0.415305	0	3.67421	0
lnc-ARF6-3:1	ARF6	-12.1257	0.0214639	0.130299	4.90092	5.25695	25.3336	0	0	3.37989
lnc-ARFGAP1-4:2	ARFGAP1	-27.2085	0.186925	0.40704	1.38705	0	0	0	0	0
lnc-ARFGAP1-4:6	ARFGAP1	-2.82132	0.36321	0.59968	10.3567	5.40298	0.27687	4.67605	0.612368	0
lnc-ARFGAP3-1:1	ARFGAP3	3.61579	0.288007	0.525942	0.36988	1.31424	0	2.59781	1.8371	1.68995
lnc-ARG2-1:1	ARG2	-1.18201	0.926682	0.973765	1.47952	2.33642	0	0	0	3.37989
lnc-ARG2-3:1	ARG2	-2.02799	0.456688	0.686358	6.1955	7.59338	2.90714	4.67605	0	3.37989
lnc-ARHGAP11A-5:1	ARHGAP11A	-194.742	0.00958041	0.0876425	1.10964	0.146027	9.13672	0	0	0
lnc-ARHGAP11B-1:1	ARHGAP11B	3.74525	0.379113	0.615521	0.832231	0	0	3.11737	0	0
lnc-ARHGAP11B-4:1	ARHGAP11B	-67.9941	0.0350833	0.164039	0.739761	1.75232	1.10748	0	0	0
lnc-ARHGAP12-2:1	ARHGAP12	-5.47991	0.265765	0.502114	1.94187	0	0.27687	0.259781	0	0
lnc-ARHGAP15-2:1	ARHGAP15	7.48223	0.1589	0.368414	0	4.9649	8.72141	52.7354	0	49.8534
lnc-ARHGAP15-2:2	ARHGAP15	-193.146	0.0208512	0.12827	10.2642	0	0	0	0	0
lnc-ARHGAP17-5:1	ARHGAP17	-10.4169	0.0107745	0.0925313	19.2338	13.8725	19.9347	0.519561	0	5.06984
lnc-ARHGAP21-1:2	ARHGAP21	-6.39239	0.033573	0.161462	16.8296	18.6914	18.9656	7.01407	0	0.844973
lnc-ARHGAP21-4:1	ARHGAP21	-7.16596	0.0996702	0.2842	10.6341	3.35861	1.66122	0	0	2.53492
lnc-ARHGAP29-7:1	ARHGAP29	1.08491	0.936352	0.976852	3.23645	4.3808	0.138435	4.15649	0	4.22487
lnc-ARHGAP35-2:1	ARHGAP35	-14.0394	0.00909812	0.0851984	13.778	5.54901	14.2588	0.779342	0	1.68995
lnc-ARHGDIA-2:1	ARHGDIA	1.0147	0.992307	1	0	4.3808	1.24592	2.33802	0	3.37989
lnc-ARHGDIA-2:2	ARHGDIA	3.868	0.427889	0.663019	0	0	0.415305	1.55868	0	0
lnc-ARHGEF1-4:1	ARHGEF1	2.60663	0.577802	0.784342	2.21928	0	0	4.93583	0	0.844973
lnc-ARHGEF10L-1:1	ARHGEF10L	-3.60459	0.243229	0.47441	4.25362	3.06656	1.66122	0.259781	0	2.53492
lnc-ARHGEF2-3:4	ARHGEF2	-3.52919	0.170529	0.384133	3.23645	3.21258	17.4428	1.03912	4.89894	0.844973
lnc-ARHGEF35-2:1	ARHGEF35	-21.7612	0.0474125	0.193824	1.10964	1.02219	12.8745	0	0	0.844973
lnc-ARHGEF37-1:1	ARHGEF37	-14.346	0.202067	0.425605	0.554821	0	0.138435	0	0	0
lnc-ARHGEF7-3:1	ARHGEF7	1.00814	0.994492	1	3.79127	0.292053	6.64489	8.0532	0	2.53492
lnc-ARID2-11:1	ARID2	-517.504	0.000325224	0.0158212	3.79127	20.5897	3.32244	0	0	0
lnc-ARID3B-1:1	ARID3B	-3.53197	0.354944	0.593397	2.12681	3.35861	5.53741	0	0	3.37989
lnc-ARL1-3:1	ARL1	1.74592	0.642571	0.829099	2.86657	0.43808	0.969046	0.259781	4.89894	2.53492
lnc-ARL1-4:1	ARL1	-5.53402	0.0349559	0.163899	22.2853	36.2146	9.27515	1.81846	0	10.9846
lnc-ARL10-3:1	ARL10	2.2234	0.427476	0.662635	6.38044	0	19.6578	36.6291	0	21.1243
lnc-ARL13A-1:1	ARL13A	-7.50137	0.0204679	0.12799	19.0488	18.2533	7.61393	2.07824	3.67421	0
lnc-ARL16-1:1	ARL16	-2.53746	0.290073	0.528737	14.0555	1.46027	3.59931	5.19561	1.8371	0
lnc-ARL3-1:1	ARL3	18.1186	8.89367e-05	0.00739273	7.85996	3.21258	3.18401	178.989	19.5958	60.8381
lnc-ARL4A-1:1	ARL4A	-2.98375	0.315049	0.556162	9.24701	2.1904	0.138435	2.07824	0	1.68995
lnc-ARL4C-11:1	ARL4C	-183.763	0.0339352	0.161932	0	2.1904	7.61393	0	0	0
lnc-ARL6IP4-1:11	ARL6IP4	-1.09638	0.915404	0.970158	3.79127	2.1904	3.18401	1.81846	4.89894	1.68995
lnc-ARL6IP4-1:9	ARL6IP4	1.66237	0.724245	0.880206	0.0924701	1.31424	0.138435	2.33802	0	0
lnc-ARMC6-1:1	ARMC6	-2.25215	0.499544	0.723319	5.73315	0	1.79966	0.259781	0	3.37989
lnc-ARMC7-1:1	ARMC7	6.08889	0.0817266	0.255462	4.34609	1.60629	1.38435	43.6431	0	0.844973
lnc-ARMCX6-2:2	ARMCX6	-7.83287	0.0718433	0.237584	2.68163	4.08874	16.6122	0	0	3.37989
lnc-ARPC5L-1:1	ARPC5L	-1.73912	0.634691	0.824022	2.31175	7.00927	0	4.93583	0	0
lnc-ARRB1-1:1	ARRB1	914.585	3.77319e-07	0.000282276	0	0	0	23.1205	17.1463	8.44973
lnc-ARRDC2-2:1	ARRDC2	2.00152	0.250484	0.483539	14.8877	29.4974	52.3285	28.5759	98.5912	66.7529
lnc-ARRDC3-2:1	ARRDC3	1.72539	0.643512	0.829714	1.8494	0	0.415305	3.63693	0	0
lnc-ARRDC3-6:1	ARRDC3	-4.50699	0.129144	0.328338	23.1175	7.00927	10.5211	4.67605	0	4.22487
lnc-ARRDC4-6:1	ARRDC4	1.54693	0.660052	0.841055	1.75693	7.59338	5.39897	9.3521	0	13.5196
lnc-ARRDC4-7:1	ARRDC4	1.57738	0.810277	0.919703	0	1.89834	0	2.85759	0	0
lnc-ARSB-1:1	ARSB	-1.20174	0.761267	0.897163	37.5429	67.7563	88.7369	11.4303	109.001	41.4037
lnc-ARSJ-3:1	ARSJ	-2.02401	0.54846	0.763546	1.94187	0	2.90714	0.779342	0	1.68995
lnc-ARSK-1:1	ARSK	-5.72712	0.141204	0.345121	8.13737	5.69503	0.27687	2.07824	0	0
lnc-ART3-1:2	ART3	-1.52651	0.742007	0.885843	2.58916	2.33642	1.93809	4.15649	0	0
lnc-ART5-1:3	ART5	1.88742	0.551003	0.764928	8.13737	3.21258	0	14.5477	0	6.75978
lnc-ART5-1:4	ART5	-23.7039	0.223259	0.450828	1.20211	0	0	0	0	0
lnc-ARVCF-1:8	ARVCF	-8.12742	0.0083803	0.0814207	20.8058	20.1517	39.1771	2.59781	0	7.60476
lnc-ARVCF-1:9	ARVCF	-1.07543	0.959498	0.987059	4.99339	2.1904	0	0	6.73605	0
lnc-ARVCF-4:13	ARVCF	-1.95642	0.687378	0.857063	0.36988	3.21258	0	0	1.8371	0
lnc-ASAH2-6:1	ASAH2	11.6097	0.00819488	0.0814203	5.91809	1.31424	1.66122	44.4225	0	59.9931
lnc-ASAH2C-5:1	ASAH2C	-52.5242	0.104863	0.29333	0	2.7745	0	0	0	0
lnc-ASAP1-5:1	ASAP1	-205.428	0.00534437	0.0640278	2.58916	3.94272	4.42992	0	0	0
lnc-ASAP1-6:1	ASAP1	3.4971	0.287623	0.525826	1.75693	3.79669	0	15.8466	0	3.37989
lnc-ASB4-7:1	ASB4	1.85965	0.45576	0.685575	5.08586	7.44735	9.96733	16.626	0	25.3492
lnc-ASB4-7:2	ASB4	-1.67954	0.713879	0.874872	0.647291	3.21258	0	0	0	2.53492
lnc-ASB5-1:1	ASB5	8.43937	0.0600444	0.217485	3.05151	3.06656	0	31.6932	0	20.2794
lnc-ASB5-2:1	ASB5	1.63471	0.62845	0.820429	3.32892	4.9649	1.10748	12.4695	0	2.53492
lnc-ASB7-6:2	ASB7	-1.45684	0.734157	0.883162	0.739761	2.1904	0.553741	0.779342	0	1.68995
lnc-ASF1A-6:1	ASF1A	1.42409	0.784157	0.909243	1.10964	0.43808	0.830611	3.11737	0	0
lnc-ASPH-5:3	ASPH	-1.06542	0.96831	0.990435	2.12681	0	0	1.81846	0	0
lnc-ASPH-6:1	ASPH	-34.1467	0.15326	0.361142	1.75693	0	0	0	0	0
lnc-ASXL1-1:1	ASXL1	-1	1	1	0	0	0	0	0	0
lnc-ATAD1-2:1	ATAD1	-5.04863	0.0987541	0.28258	12.4835	3.06656	4.29149	3.37715	0	0
lnc-ATAD5-3:12	ATAD5	-26.337	0.0275742	0.146149	2.03434	1.31424	7.8908	0.259781	0	0
lnc-ATAD5-3:7	ATAD5	28.2509	1.19218e-05	0.00211883	13.778	15.3328	1.10748	536.187	103.49	215.468
lnc-ATF3-1:1	ATF3	2.29476	0.403674	0.640771	8.0449	0	3.87618	16.3662	0	10.9846
lnc-ATF7IP2-3:6	ATF7IP2	-76.4818	0.0391856	0.174934	1.8494	2.1904	0	0	0	0
lnc-ATG10-3:1	ATG10	18.6566	0.0330266	0.160092	0.0924701	0	0	2.59781	0	0
lnc-ATG12-5:1	ATG12	-7.42776	0.0439825	0.186248	6.28797	2.48245	9.27515	0.259781	0	2.53492
lnc-ATG16L2-9:1	ATG16L2	1.74727	0.43394	0.666146	9.52442	14.1646	6.50645	2.59781	33.6802	16.8995
lnc-ATG2B-2:3	ATG2B	49.225	0.0185837	0.12148	0	0	0	2.33802	0	0
lnc-ATG2B-2:4	ATG2B	-262.005	0.0165335	0.113777	10.1717	3.79669	0	0	0	0
lnc-ATG7-1:1	ATG7	10.9715	0.0153965	0.110399	1.75693	65.1278	2.49183	722.19	10.4103	27.8841
lnc-ATHL1-1:3	ATHL1	1.19148	0.869096	0.948708	3.05151	0.584106	2.63027	7.01407	0	0
lnc-ATHL1-2:1	ATHL1	2.57842	0.341761	0.581996	4.99339	8.17748	0.138435	28.0563	0	5.91481
lnc-ATL1-3:1	ATL1	8.04336	0.051027	0.199934	1.57199	1.60629	1.52279	34.291	0	3.37989
lnc-ATL3-1:9	ATL3	-156.974	0.0168591	0.114083	0	1.31424	7.06019	0	0	0
lnc-ATL3-2:1	ATL3	-9.6058	0.0309632	0.154668	2.95904	8.17748	4.29149	0.259781	0.612368	0.844973
lnc-ATP10A-7:2	ATP10A	-47.3617	0.0933264	0.274798	2.03434	0.292053	0.138435	0	0	0
lnc-ATP1A3-1:1	ATP1A3	-5.6596	0.193013	0.414679	6.65785	4.23477	6.64489	0	0	3.37989
lnc-ATP1B3-2:1	ATP1B3	-131.884	0.0150205	0.109192	3.88374	1.31424	1.79966	0	0	0
lnc-ATP2B2-1:3	ATP2B2	-170.489	0.010509	0.0920109	1.10964	4.52682	3.46088	0	0	0
lnc-ATP2C2-2:1	ATP2C2	-1.2281	0.865343	0.946913	4.06868	2.04437	0.692176	0	0	5.91481
lnc-ATP5D-4:2	ATP5D	-5.05798	0.332741	0.575868	6.28797	0	0	1.03912	0	0
lnc-ATP5F1-3:1	ATP5F1	1.80506	0.57253	0.779728	3.32892	1.46027	1.10748	0	9.18552	1.68995
lnc-ATP6AP1L-5:1	ATP6AP1L	1.91856	0.325005	0.567472	443.764	175.524	290.298	1210.84	38.5792	495.154
lnc-ATP6AP2-13:1	ATP6AP2	1.01767	0.978887	0.994844	11.8362	16.501	13.5666	8.31298	22.6576	11.8296
lnc-ATP6AP2-2:2	ATP6AP2	-6.3029	0.107452	0.296871	9.43195	0	11.4901	1.55868	0	1.68995
lnc-ATP6AP2-2:4	ATP6AP2	-34.609	0.00617468	0.0690577	9.06207	8.90762	4.01462	0	0	0.844973
lnc-ATP6AP2-4:1	ATP6AP2	-22.1357	0.17626	0.390254	1.10964	0	0	0	0	0
lnc-ATP6AP2-9:1	ATP6AP2	-1.38955	0.790713	0.912487	10.5416	0	0	4.15649	0	3.37989
lnc-ATP6V0E2-2:4	ATP6V0E2	1.0669	0.942453	0.978182	12.2061	6.27914	0.969046	15.3271	0	5.06984
lnc-ATP6V1C1-8:1	ATP6V1C1	-2.95769	0.271709	0.509729	7.21267	2.48245	7.75237	1.81846	0	4.22487
lnc-ATP6V1C1-9:3	ATP6V1C1	-67.2842	0.0243926	0.138013	1.29458	0.730133	1.52279	0	0	0
lnc-ATP6V1E1-4:1	ATP6V1E1	-100.009	0.0236522	0.136844	2.58916	1.46027	1.24592	0	0	0
lnc-ATP6V1G2-DDX39B-2:1	ATP6V1G2-DDX39B	-2.53711	0.485792	0.710925	0.27741	5.11093	0	1.81846	0	0
lnc-ATP7A-2:1	ATP7A	1.75523	0.632952	0.823033	1.94187	4.9649	0.138435	0	11.635	0.844973
lnc-ATP8B3-3:1	ATP8B3	-3.25482	0.284443	0.52341	4.34609	1.31424	1.52279	1.81846	0	0
lnc-ATPIF1-2:1	ATPIF1	-16.2743	0.0681112	0.231496	1.29458	0.292053	5.26053	0.259781	0	0
lnc-ATXN1-2:1	ATXN1	-34.0289	0.126364	0.324536	1.20211	0	0.553741	0	0	0
lnc-ATXN10-1:3	ATXN10	3.97123	0.187599	0.407979	3.51386	9.3457	0.27687	29.3552	0	22.8143
lnc-ATXN2L-1:1	ATXN2L	-18.3266	0.014125	0.105369	13.3157	3.21258	8.30611	0	0	1.68995
lnc-ATXN3-3:2	ATXN3	-1.07307	0.960806	0.987204	2.31175	0.730133	0	2.59781	0	0
lnc-ATXN7-6:1	ATXN7	379.821	0.00059111	0.0204478	0	0	0	10.1314	0	10.1397
lnc-AUH-2:5	AUH	47.3869	0.0569827	0.210921	0	0	0	2.33802	0	0
lnc-AUH-4:1	AUH	-7.69443	0.0760185	0.244311	2.21928	3.50464	2.63027	0.779342	0	0
lnc-AUH-6:1	AUH	-272.256	0.00169313	0.0350356	8.87713	1.75232	3.87618	0	0	0
lnc-AVPR1B-1:1	AVPR1B	-5.36593	0.16587	0.377937	4.99339	0	3.73775	1.2989	0	0
lnc-AZIN1-1:4	AZIN1	-6.78934	0.00255954	0.0432135	45.3103	25.7007	34.055	4.41627	3.67421	7.60476
lnc-AZIN1-2:1	AZIN1	-15.4875	8.33623e-05	0.00711726	60.1056	57.0964	47.4832	4.15649	0.612368	5.91481
lnc-B2M-1:1	B2M	-3.29033	0.422351	0.658566	1.47952	0	8.85985	2.85759	0	0
lnc-B2M-1:2	B2M	-14.772	0.0213757	0.130284	7.02773	6.71722	6.22958	0	0	1.68995
lnc-B3GALNT2-3:1	B3GALNT2	-2.08399	0.311368	0.552131	25.7067	17.9613	19.5194	21.302	0	8.44973
lnc-B3GNT4-3:1	B3GNT4	3.0606	0.351108	0.591106	1.29458	1.16821	0	7.27385	0	0
lnc-B3GNT7-1:2	B3GNT7	-21.1245	0.0748999	0.242452	1.01717	0	14.1204	0	0	0.844973
lnc-B3GNT7-3:1	B3GNT7	1.97901	0.712355	0.874118	1.47952	0	0	2.85759	0	0
lnc-B3GNT9-1:1	B3GNT9	-1.46165	0.757859	0.894974	1.10964	0.584106	1.52279	0	0	2.53492
lnc-B3GNTL1-1:4	B3GNTL1	1.63471	0.703961	0.868089	0.832231	0	3.73775	0	6.73605	0.844973
lnc-B3GNTL1-2:3	B3GNTL1	-52.4953	0.0740198	0.240994	1.29458	1.46027	0	0	0	0
lnc-B3GNTL1-3:1	B3GNTL1	-29.2149	0.000748445	0.0235696	20.1585	2.7745	10.5211	0.779342	0	0
lnc-B4GALNT3-2:3	B4GALNT3	1.89661	0.547457	0.762838	12.2985	0	0.969046	15.8466	0	9.2947
lnc-B4GALT2-1:1	B4GALT2	3.93973	0.431019	0.663857	1.10964	0	0	2.85759	0	1.68995
lnc-B9D2-1:3	B9D2	-9.8897	0.0170786	0.115336	5.2708	7.00927	7.8908	0.519561	0	1.68995
lnc-BABAM1-1:4	BABAM1	1.00349	0.998046	1	0	4.08874	0	2.33802	0	1.68995
lnc-BACE1-1:1	BACE1	-1043.05	1.40159e-06	0.000629129	16.4597	14.6027	24.7799	0	0	0
lnc-BACE1-2:1	BACE1	-8.34432	0.00945145	0.0870299	31.7172	12.4123	25.0568	2.59781	0	5.91481
lnc-BACE2-1:1	BACE2	6.96538	0.156673	0.36501	1.10964	0.292053	0	8.31298	0	1.68995
lnc-BAG3-6:1	BAG3	2.60848	0.565094	0.775146	0	0.43808	0	1.03912	0	0
lnc-BAK1-2:1	BAK1	2.49658	0.322037	0.564802	3.14398	3.94272	2.7687	21.5618	0	2.53492
lnc-BAMBI-4:6	BAMBI	1.93054	0.603375	0.801761	1.20211	0.43808	2.07653	0.519561	6.73605	0
lnc-BANP-1:2	BANP	-119.83	0.00777737	0.0784991	4.90092	0.730133	0.692176	0	0	0
lnc-BANP-12:1	BANP	-102.804	0.0290281	0.150015	0.739761	3.06656	1.66122	0	0	0
lnc-BARX2-1:1	BARX2	-5.38072	0.00638286	0.07028	60.198	74.0354	88.8754	7.53364	6.73605	27.8841
lnc-BASP1-1:1	BASP1	-2.50083	0.145068	0.351219	45.4953	144.42	78.3543	14.2879	20.2081	73.5127
lnc-BASP1-14:1	BASP1	3.75838	0.325556	0.567574	1.47952	1.89834	0.969046	0	16.5339	0
lnc-BASP1-16:1	BASP1	-1.71996	0.50598	0.727786	9.24701	1.31424	4.15305	2.85759	0	5.91481
lnc-BASP1-8:1	BASP1	1.00602	0.996432	1	2.49669	0	0	2.33802	0	0
lnc-BATF3-2:3	BATF3	-1.43249	0.750824	0.891552	1.94187	4.67285	2.49183	0	0	6.75978
lnc-BBIP1-4:1	BBIP1	-9.60206	0.0347127	0.163213	7.30514	7.59338	5.26053	0	0	2.53492
lnc-BBOX1-4:1	BBOX1	1.16052	0.854571	0.942941	2.7741	5.25695	15.6432	1.2989	14.6968	11.8296
lnc-BCKDK-2:1	BCKDK	-2.30156	0.473245	0.700606	3.23645	1.31424	0	1.03912	0	0.844973
lnc-BCL11A-9:1	BCL11A	-11.1636	0.0051194	0.0624438	6.93526	29.6434	44.2992	5.19561	0.612368	0.844973
lnc-BCL2L11-6:1	BCL2L11	-149.427	0.0255152	0.140815	2.40422	2.92053	2.63027	0	0	0
lnc-BCL2L13-3:1	BCL2L13	-3.46953	0.368176	0.603587	1.8494	2.62848	3.46088	0	0	2.53492
lnc-BCL2L14-1:3	BCL2L14	-65.7591	0.0514953	0.200693	2.03434	0.730133	0.692176	0	0	0
lnc-BCL2L15-1:1	BCL2L15	-243.452	0.00222393	0.0396956	7.39761	0.584106	4.98366	0	0	0
lnc-BCL2L2-PABPN1-1:1	BCL2L2-PABPN1	1.01748	0.987771	0.999791	3.05151	4.3808	1.52279	0	9.18552	0
lnc-BCL2L2-PABPN1-1:2	BCL2L2-PABPN1	-1.14561	0.905684	0.964869	0.462351	0	2.07653	0.259781	1.22474	0.844973
lnc-BCL3-1:1	BCL3	1.60997	0.729849	0.882345	2.86657	0	0	4.41627	0	0
lnc-BCL7A-3:1	BCL7A	-6.44196	0.00569733	0.0662523	34.7688	20.4437	28.7945	4.93583	0.612368	7.60476
lnc-BCL7B-1:2	BCL7B	-3.83636	0.354968	0.593397	6.84279	2.1904	0	2.07824	0	0
lnc-BCL7C-1:2	BCL7C	21.8953	0.000958002	0.0268759	11.2814	0.43808	0.138435	183.665	17.7587	60.8381
lnc-BCL9L-1:1	BCL9L	-6.5735	0.0222035	0.132414	18.5865	12.2662	12.5976	1.81846	0	5.06984
lnc-BCOR-6:1	BCOR	-3.43754	0.142705	0.347632	13.1308	9.9298	1.52279	3.63693	0	3.37989
lnc-BCR-2:1	BCR	-1.00866	0.99364	1	1.47952	0	0	0	0	1.68995
lnc-BDH1-5:5	BDH1	4.46537	0.0669301	0.229333	6.1955	5.84106	4.29149	35.0704	0	38.0238
lnc-BDH1-5:9	BDH1	2.02613	0.353799	0.592949	40.5019	16.355	9.13672	88.0656	0.612368	44.7836
lnc-BDH1-8:1	BDH1	1.004	0.996637	1	3.05151	3.50464	0.553741	4.41627	0	2.53492
lnc-BEND3-1:1	BEND3	-7.35526	0.164664	0.376334	0	5.98709	4.84523	0	0	1.68995
lnc-BEND3-3:5	BEND3	-7.2676	0.0116208	0.0961282	27.741	19.2755	20.2115	2.07824	0	7.60476
lnc-BEND6-2:1	BEND6	1.60762	0.429763	0.663595	15.7199	27.307	16.6122	11.6901	50.8265	33.7989
lnc-BEND7-5:5	BEND7	-23.9746	0.143692	0.349019	1.20211	0	0	0	0	0
lnc-BET3L-2:1	BET3L	2.56714	0.338993	0.580627	0.832231	0	1.93809	1.2989	4.28657	1.68995
lnc-BHLHA15-1:1	BHLHA15	3.80624	0.391299	0.627887	3.88374	0	0	9.87166	0	5.06984
lnc-BHMT2-1:8	BHMT2	-60.0576	0.0614167	0.21984	2.12681	1.02219	0	0	0	0
lnc-BHMT2-4:1	BHMT2	31.113	2.36087e-05	0.00318544	8.41478	2.1904	0.553741	244.194	28.7813	77.7375
lnc-BICD1-3:1	BICD1	-5.9216	0.172035	0.386619	6.47291	8.46954	3.32244	0	0	3.37989
lnc-BID-3:1	BID	-1.4084	0.755632	0.893986	2.40422	2.04437	2.07653	0	0	5.06984
lnc-BIK-1:2	BIK	-86.1332	0.039364	0.175522	2.21928	2.33642	0	0	0	0
lnc-BIRC7-1:2	BIRC7	-21.9853	0.227833	0.455807	1.10964	0	0	0	0	0
lnc-BIRC8-3:1	BIRC8	-1.6844	0.644547	0.830572	2.86657	7.1553	4.70679	0.779342	7.96078	0
lnc-BLACE-2:2	BLACE	12.3795	0.0242712	0.13749	5.17833	0.876159	0	44.4225	10.4103	21.1243
lnc-BLID-6:1	BLID	-3.9512	0.0764668	0.245284	10.7265	43.3699	63.8186	16.1064	0	13.5196
lnc-BLID-8:1	BLID	4.78092	0.0867074	0.263329	5.17833	3.65066	1.10748	36.3693	0	10.9846
lnc-BLNK-2:1	BLNK	-1.15498	0.848467	0.939285	5.36327	14.0185	9.41359	1.2989	17.1463	6.75978
lnc-BLNK-4:1	BLNK	-23.056	0.170207	0.383559	1.01717	0.146027	0	0	0	0
lnc-BMI1-3:7	BMI1	8.90815	0.0822573	0.256882	0	2.33642	0.138435	7.53364	10.4103	4.22487
lnc-BMP6-17:1	BMP6	-7.51427	0.207028	0.431287	1.10964	2.62848	0.830611	0	0.612368	0
lnc-BMS1-10:2	BMS1	-3.53098	0.019065	0.122182	163.672	273.508	321.723	79.4928	48.3771	87.0322
lnc-BMS1-11:1	BMS1	-1.85083	0.277051	0.514731	25.0594	49.2109	39.0387	11.1706	25.1071	25.3492
lnc-BMS1-12:1	BMS1	-2.24313	0.127176	0.325639	237.371	461.59	268.149	186.522	133.496	110.691
lnc-BMS1-7:2	BMS1	1.74734	0.469	0.697234	19.6037	15.3328	10.7979	55.8528	0	23.6592
lnc-BNC1-1:1	BNC1	-1.2571	0.892242	0.960426	2.03434	0	1.79966	2.85759	0	0
lnc-BNIP1-3:3	BNIP1	-182.351	0.00325201	0.0497631	5.91809	0.584106	3.18401	0	0	0
lnc-BOD1-1:14	BOD1	-28.8771	0.205635	0.42983	1.47952	0	0	0	0	0
lnc-BOLA3-4:1	BOLA3	1.46929	0.738447	0.883939	5.08586	0.730133	0.969046	7.27385	0	2.53492
lnc-BORA-25:1	BORA	-1.53648	0.628681	0.820429	1.38705	3.79669	11.767	2.59781	4.28657	4.22487
lnc-BPHL-4:2	BPHL	-10.4527	0.00151365	0.0331175	27.1862	35.4844	21.8728	4.15649	1.8371	1.68995
lnc-BPHL-8:1	BPHL	-4.16102	0.134714	0.336185	68.1505	29.3513	39.5924	19.2238	0	13.5196
lnc-BPNT1-2:5	BPNT1	6.41166	0.118773	0.312872	1.20211	1.60629	1.24592	0	26.3318	0
lnc-BRCA1-3:2	BRCA1	-87.2275	0.0417713	0.180982	1.57199	0	3.04557	0	0	0
lnc-BRCA1-3:5	BRCA1	-8.40076	0.172169	0.386661	1.47952	0	3.59931	0	0.612368	0
lnc-BRCA1-3:9	BRCA1	-4.99094	0.13633	0.338088	2.68163	5.25695	10.1058	0	3.67421	0
lnc-BRCA2-1:1	BRCA2	1.60204	0.718911	0.876254	1.01717	2.1904	0	2.59781	0	2.53492
lnc-BRD1-2:1	BRD1	-1.12	0.923501	0.973019	7.39761	2.62848	0	7.01407	0	1.68995
lnc-BRD1-3:1	BRD1	-1.0923	0.944428	0.978945	1.20211	1.31424	1.24592	3.11737	0	0
lnc-BRD1-7:1	BRD1	-103.691	0.0584931	0.21474	3.88374	1.60629	0	0	0	0
lnc-BRD3-3:1	BRD3	-3.93837	0.325413	0.567472	5.08586	3.21258	0	1.81846	0	0
lnc-BRD9-2:1	BRD9	-2.62455	0.495476	0.719594	2.21928	4.67285	0	2.33802	0	0
lnc-BRF1-1:6	BRF1	-1.71059	0.655364	0.838253	6.56538	1.16821	0	4.15649	0	0
lnc-BRI3-1:5	BRI3	-140.893	0.0234431	0.136075	3.51386	1.89834	2.07653	0	0	0
lnc-BRI3-2:1	BRI3	-5.56228	0.0450632	0.188103	10.819	10.5139	17.166	5.45539	0	0.844973
lnc-BRI3-2:2	BRI3	-1.08482	0.949007	0.981516	3.14398	0	0.553741	3.11737	0	0
lnc-BRI3-2:3	BRI3	1.08231	0.922003	0.972395	5.45574	1.75232	5.26053	2.33802	5.51131	5.91481
lnc-BRI3-2:4	BRI3	1.89124	0.539847	0.756589	1.47952	0.146027	0.27687	1.2989	0	2.53492
lnc-BRI3BP-3:1	BRI3BP	-5.27282	0.175883	0.390254	2.31175	5.11093	1.52279	0.779342	0	0.844973
lnc-BRS3-1:1	BRS3	-4.65234	0.0453496	0.188642	12.2985	16.9391	25.7489	6.49451	0	5.06984
lnc-BSG-1:1	BSG	-2.77708	0.241901	0.473053	1.8494	11.5361	7.06019	3.89671	3.06184	0
lnc-BSND-1:1	BSND	-2.95797	0.417589	0.654171	2.31175	0	5.53741	2.33802	0	0
lnc-BTBD1-2:1	BTBD1	-120.423	0.0233092	0.135762	0	3.65066	2.7687	0	0	0
lnc-BTBD10-7:1	BTBD10	-34.3096	0.089872	0.268871	0	0	1.79966	0	0	0
lnc-BTBD16-1:1	BTBD16	2.03713	0.547237	0.762837	0.27741	0	3.32244	4.67605	0	2.53492
lnc-BTBD16-1:2	BTBD16	-3.85369	0.29272	0.532095	1.01717	2.62848	5.67584	2.07824	0	0
lnc-BTBD19-2:2	BTBD19	-10.6918	0.0349061	0.163893	13.8705	8.32351	0	0.519561	0	1.68995
lnc-BTF3-4:1	BTF3	1.86274	0.580106	0.785859	4.16115	0.730133	0	4.93583	0	4.22487
lnc-BTG3-9:1	BTG3	-10.6222	0.000844595	0.0255007	24.3196	50.2331	83.0611	3.63693	3.06184	8.44973
lnc-BTG4-1:1	BTG4	-36.5515	0.0700186	0.235271	1.01717	0.876159	0	0	0	0
lnc-BTK-1:1	BTK	-11.8082	0.107387	0.296829	1.38705	4.81887	1.93809	0	0	0.844973
lnc-BTN2A2-2:3	BTN2A2	1.97973	0.574059	0.780837	0.647291	0.292053	0	1.03912	0	0.844973
lnc-BTNL3-2:2	BTNL3	4.23989	0.190008	0.411056	5.17833	1.46027	0	24.6791	0	3.37989
lnc-BTNL8-6:1	BTNL8	5.19373	0.18311	0.401067	3.88374	0	0	8.83254	0	11.8296
lnc-BX255923.1-3:1	BX255923.1	-64.0606	0.0684099	0.232218	1.57199	0	1.79966	0	0	0
lnc-BX255923.1-8:1	BX255923.1	-1.99447	0.406345	0.643387	24.0422	4.67285	5.53741	14.0281	2.44947	0
lnc-BZW1-1:1	BZW1	1.36031	0.779033	0.908679	3.79127	3.21258	0.138435	3.89671	0	5.91481
lnc-C10orf103-5:1	C10orf103	-124.258	0.0284322	0.148566	4.25362	2.33642	0	0	0	0
lnc-C10orf105-2:1	C10orf105	1.30923	0.851911	0.941704	2.49669	0	8.02924	13.5086	0	0
lnc-C10orf137-1:10	C10orf137	5.80014	0.0727005	0.238714	1.75693	3.94272	1.52279	27.277	11.0226	3.37989
lnc-C10orf25-2:5	C10orf25	-189.173	0.0147337	0.108299	3.51386	6.57119	0	0	0	0
lnc-C10orf25-4:1	C10orf25	1.27604	0.818808	0.923701	2.7741	2.92053	0.553741	1.81846	6.12368	0
lnc-C10orf28-2:1	C10orf28	8.50084	0.110678	0.302064	0.462351	0	1.38435	12.4695	0	3.37989
lnc-C10orf28-7:2	C10orf28	13.8806	0.116201	0.309603	0	0	0	0	0	0.844973
lnc-C10orf54-1:1	C10orf54	1.28914	0.862243	0.945958	0	2.92053	0.138435	3.11737	0.612368	0
lnc-C10orf57-3:1	C10orf57	5.1797	0.10647	0.295492	5.36327	0.146027	1.66122	24.6791	0	12.6746
lnc-C10orf68-1:3	C10orf68	1.84494	0.732498	0.883162	0	2.33642	0	4.15649	0	0
lnc-C10orf90-2:2	C10orf90	8.03145	0.00201094	0.0377149	11.7437	8.17748	4.42992	131.709	25.7194	38.0238
lnc-C11orf16-7:5	C11orf16	-201.902	0.0205566	0.128067	4.25362	0	6.50645	0	0	0
lnc-C11orf30-1:1	C11orf30	-1.77081	0.447997	0.679209	20.066	76.2258	34.055	8.57276	25.7194	39.7137
lnc-C11orf35-3:1	C11orf35	2.00737	0.595607	0.795407	0.924701	2.04437	0	4.15649	0	1.68995
lnc-C11orf35-3:3	C11orf35	2.00735	0.595686	0.795407	0.924701	2.04437	0	4.15649	0	1.68995
lnc-C11orf44-7:1	C11orf44	-2.16219	0.488362	0.713263	3.97621	3.94272	3.87618	0	5.51131	0
lnc-C11orf63-6:1	C11orf63	-16.1018	0.00381848	0.0535621	20.251	11.098	6.36802	1.81846	0	0
lnc-C11orf88-1:1	C11orf88	-2.24375	0.581331	0.786755	4.53103	0	0.692176	2.07824	0	0
lnc-C11orf94-5:1	C11orf94	3.00856	0.295317	0.535622	7.49008	5.11093	0	20.2629	0	17.7444
lnc-C12orf35-1:4	C12orf35	24.9371	0.0041423	0.0560398	2.58916	0	0.27687	63.1267	1.22474	9.2947
lnc-C12orf35-5:1	C12orf35	-1.16328	0.804842	0.919152	43.6459	40.3033	74.8934	7.53364	83.8944	45.6285
lnc-C12orf39-2:4	C12orf39	-2.17239	0.413474	0.650448	7.49008	7.88543	6.92176	9.61188	0	0
lnc-C12orf42-2:3	C12orf42	7.47458	0.182736	0.400508	0	0	0	0.259781	0	0
lnc-C12orf44-1:1	C12orf44	-1.67694	0.67822	0.852428	4.90092	0.876159	0	3.11737	0	0
lnc-C12orf44-5:1	C12orf44	1.09626	0.936234	0.976852	4.90092	0.146027	9.55202	6.75429	0	9.2947
lnc-C12orf49-4:1	C12orf49	-10.8355	0.090242	0.269106	8.78466	0.292053	2.07653	0.779342	0	0
lnc-C12orf49-6:1	C12orf49	4.08621	0.201446	0.42545	2.58916	1.46027	0	2.85759	9.79788	4.22487
lnc-C12orf50-6:2	C12orf50	-1.21153	0.783954	0.909243	4.80845	16.0629	16.8891	5.71517	22.0452	3.37989
lnc-C12orf50-7:1	C12orf50	-4.86362	0.111594	0.303775	5.73315	4.08874	9.82889	0.259781	0	4.22487
lnc-C12orf51-1:4	C12orf51	-1.34559	0.667594	0.845398	15.7199	33.4401	4.70679	7.79342	26.3318	5.91481
lnc-C12orf52-2:2	C12orf52	-1.66092	0.644013	0.830042	3.42139	0.146027	1.38435	1.2989	0	1.68995
lnc-C12orf68-3:1	C12orf68	-451.774	0.000436124	0.0177424	3.97621	15.7709	4.42992	0	0	0
lnc-C12orf68-4:1	C12orf68	-3.8099	0.0948799	0.277871	18.5865	22.7801	12.8745	1.55868	0.612368	12.6746
lnc-C12orf75-5:1	C12orf75	-26.3875	0.053993	0.204842	2.58916	16.2089	0	0	0	0.844973
lnc-C13orf35-2:1	C13orf35	1.52677	0.781884	0.908951	8.9696	0	0	13.5086	0	0
lnc-C14orf101-7:1	C14orf101	1.71263	0.742611	0.886054	2.95904	0	0	4.93583	0	0
lnc-C14orf102-3:1	C14orf102	9.17365	0.155893	0.364076	1.29458	0.43808	0	0	16.5339	0
lnc-C14orf126-12:1	C14orf126	-4.81584	0.0113325	0.0952579	214.808	606.01	1150.12	62.8669	197.182	149.56
lnc-C14orf126-5:1	C14orf126	-39.4111	0.117271	0.310738	2.03434	0	0	0	0	0
lnc-C14orf126-7:1	C14orf126	-1.70149	0.606508	0.803703	3.14398	4.9649	6.50645	1.2989	0	7.60476
lnc-C14orf135-3:1	C14orf135	-313.627	0.00510286	0.0624205	1.01717	2.04437	13.7051	0	0	0
lnc-C14orf166-2:5	C14orf166	-5.15505	0.127296	0.325639	3.79127	7.1553	2.90714	0.519561	0.612368	1.68995
lnc-C14orf176-3:1	C14orf176	-1.46596	0.721062	0.878081	2.58916	0.730133	14.2588	0	10.4103	1.68995
lnc-C14orf177-5:1	C14orf177	-1.76844	0.34904	0.589413	36.5257	42.7858	81.6767	6.23473	37.3544	48.1635
lnc-C14orf177-6:1	C14orf177	-2.2482	0.452801	0.682954	10.0792	12.8503	4.56836	7.01407	0	5.06984
lnc-C14orf180-2:2	C14orf180	6.83314	0.0373591	0.170349	2.95904	1.75232	7.33706	56.8919	0	25.3492
lnc-C14orf183-1:21	C14orf183	1.33936	0.800078	0.916919	1.8494	0	1.66122	0.779342	0	4.22487
lnc-C14orf183-1:6	C14orf183	-13.2985	0.00241284	0.0419785	22.4702	16.0629	5.67584	0.519561	0.612368	2.53492
lnc-C14orf38-2:1	C14orf38	-3.97391	0.0652744	0.227598	24.5046	12.2662	30.0404	6.75429	0	10.1397
lnc-C14orf39-1:1	C14orf39	-2.62253	0.337338	0.579561	5.2708	9.63775	5.95271	4.41627	0	3.37989
lnc-C14orf39-3:1	C14orf39	6.01905	0.16879	0.381862	2.58916	0.292053	1.38435	16.626	0	9.2947
lnc-C14orf49-5:3	C14orf49	-72.5414	0.090325	0.269106	0	2.04437	1.79966	0	0	0
lnc-C14orf57-1:1	C14orf57	-34.4343	0.00584833	0.0673108	4.43856	8.17748	2.63027	0.259781	0	0
lnc-C14orf57-2:1	C14orf57	-13.141	0.00158658	0.0335925	18.5865	56.0742	80.7077	6.49451	0	5.06984
lnc-C14orf79-2:2	C14orf79	12.1559	0.0613375	0.21984	0	0.730133	1.93809	20.0031	0	12.6746
lnc-C14orf79-2:5	C14orf79	10.7384	0.121726	0.317066	1.38705	0	0	12.989	0	2.53492
lnc-C14orf93-2:2	C14orf93	7.16946	0.00894642	0.0842713	7.49008	5.40298	13.2898	127.812	3.06184	56.6132
lnc-C15orf2-6:1	C15orf2	-327.876	0.00109994	0.0288794	6.1955	10.0758	1.24592	0	0	0
lnc-C15orf29-1:3	C15orf29	16.5998	0.0039887	0.0549201	10.2642	2.04437	1.38435	157.947	20.8205	49.8534
lnc-C15orf41-11:1	C15orf41	-1.69841	0.58851	0.791786	8.59972	0.43808	2.63027	4.15649	0	2.53492
lnc-C15orf54-4:1	C15orf54	-6.54516	0.0894942	0.268194	13.2232	22.3421	1.38435	1.55868	0	4.22487
lnc-C15orf55-1:1	C15orf55	3.27937	0.357649	0.594874	1.20211	4.23477	0.27687	18.4444	0	0
lnc-C15orf57-3:1	C15orf57	-8.25303	0.123695	0.320692	3.32892	5.84106	2.7687	0	0	1.68995
lnc-C15orf59-2:1	C15orf59	1.05759	0.9618	0.987437	1.38705	0	2.7687	2.59781	0	1.68995
lnc-C15orf60-2:2	C15orf60	-2.74244	0.436861	0.668953	1.38705	3.94272	0	0	1.22474	0.844973
lnc-C15orf61-2:1	C15orf61	-2.42435	0.356479	0.594293	6.01056	9.63775	28.1023	0.519561	15.9216	1.68995
lnc-C16orf13-1:1	C16orf13	1.04798	0.96235	0.987437	0.739761	2.7745	2.90714	5.45539	0	0.844973
lnc-C16orf13-4:2	C16orf13	-2.40828	0.412175	0.649164	1.94187	1.46027	2.3534	0.779342	0	1.68995
lnc-C16orf13-8:1	C16orf13	1.42894	0.803277	0.918089	2.49669	0	2.21496	6.49451	0	0
lnc-C16orf42-2:1	C16orf42	4.62305	0.0265045	0.143713	15.535	5.25695	9.55202	89.1047	7.96078	43.0936
lnc-C16orf47-3:1	C16orf47	-2.18725	0.354162	0.592949	6.75032	8.32351	4.01462	1.55868	0	7.60476
lnc-C16orf48-1:1	C16orf48	-10.5858	0.156133	0.364384	0	5.25695	1.24592	0	0.612368	0
lnc-C16orf53-2:1	C16orf53	1.27872	0.784412	0.90934	0.924701	2.92053	3.59931	4.41627	0	5.06984
lnc-C16orf55-2:3	C16orf55	-1.04682	0.973148	0.992458	2.21928	0	0.969046	2.07824	0	0.844973
lnc-C16orf62-1:1	C16orf62	-51.7499	0.0824156	0.257134	2.40422	0.292053	0	0	0	0
lnc-C16orf71-2:1	C16orf71	-21.9804	0.230124	0.458139	1.10964	0	0	0	0	0
lnc-C16orf72-10:1	C16orf72	-1.43133	0.736777	0.883162	3.14398	3.65066	0.692176	0.519561	0	5.06984
lnc-C16orf78-5:2	C16orf78	6.95186	0.0610008	0.219361	2.58916	2.04437	0	18.1846	0	14.3645
lnc-C17orf101-3:2	C17orf101	-1.43003	0.811741	0.920237	1.8494	0.292053	0	1.2989	0	0
lnc-C17orf103-2:1	C17orf103	-1.54189	0.697542	0.862543	0.554821	4.3808	10.5211	0.259781	4.89894	5.06984
lnc-C17orf103-4:2	C17orf103	2.39177	0.544984	0.761403	0	2.48245	0	2.59781	0	3.37989
lnc-C17orf108-2:1	C17orf108	12.9812	0.00106532	0.0286913	5.82562	4.81887	4.84523	171.715	5.51131	23.6592
lnc-C17orf46-2:7	C17orf46	-107.798	0.0408833	0.179327	5.54821	0.146027	0	0	0	0
lnc-C17orf46-4:3	C17orf46	-8.71423	0.0963531	0.280011	3.88374	0	7.75237	1.03912	0	0
lnc-C17orf48-6:1	C17orf48	-2.13698	0.4735	0.700812	7.76749	1.75232	0.969046	0.259781	0	5.06984
lnc-C17orf51-1:3	C17orf51	55.9864	0.00598926	0.0680028	0	0	0	2.59781	0	0
lnc-C17orf51-12:1	C17orf51	-5.73996	0.0788867	0.250698	34.5838	0.292053	2.07653	4.41627	0	1.68995
lnc-C17orf51-3:1	C17orf51	-1.22058	0.83242	0.931517	8.32231	1.31424	16.6122	18.4444	0	2.53492
lnc-C17orf62-3:1	C17orf62	-1.94277	0.521147	0.740583	6.10303	13.5805	2.3534	0	0	11.8296
lnc-C17orf62-6:8	C17orf62	1.43489	0.843525	0.936277	1.01717	0	0.138435	1.55868	0	0
lnc-C17orf75-2:1	C17orf75	1.12605	0.940805	0.978075	1.57199	0	0	0.259781	0	1.68995
lnc-C17orf75-3:1	C17orf75	1.54348	0.820805	0.924086	1.57199	0	0	2.33802	0	0
lnc-C17orf78-1:1	C17orf78	-1.11532	0.942135	0.978182	1.57199	0	1.93809	0	0	3.37989
lnc-C17orf84-1:1	C17orf84	-90.6095	0.0413633	0.17979	0.739761	3.79669	0.27687	0	0	0
lnc-C17orf84-1:2	C17orf84	1.60559	0.691747	0.859403	1.10964	7.88543	0.138435	0	12.2474	2.53492
lnc-C17orf84-1:3	C17orf84	-3.04891	0.459312	0.688456	0.18494	1.89834	0	0	0	0.844973
lnc-C17orf96-1:1	C17orf96	-44.4466	0.150758	0.357884	2.31175	0	0	0	0	0
lnc-C17orf97-11:1	C17orf97	-3.75999	0.17135	0.385466	5.73315	10.5139	3.87618	0	0	5.91481
lnc-C17orf97-5:2	C17orf97	-1.13446	0.909565	0.967242	4.25362	0.43808	6.09115	0	5.51131	4.22487
lnc-C18orf1-1:1	C18orf1	3.62271	0.302797	0.543308	4.62351	2.04437	0	11.6901	0	12.6746
lnc-C18orf1-1:2	C18orf1	1.96007	0.675951	0.851483	1.10964	0	0	2.07824	0	0
lnc-C18orf26-2:1	C18orf26	-7.39985	0.186855	0.407027	1.20211	0	3.87618	0	0	0.844973
lnc-C18orf34-3:1	C18orf34	-1.58589	0.66664	0.845016	1.20211	3.79669	3.18401	4.67605	0	0
lnc-C18orf54-2:1	C18orf54	-1.31895	0.833155	0.931832	0.462351	4.23477	8.99828	0	10.4103	0
lnc-C19orf12-10:1	C19orf12	15.9796	0.0455368	0.189129	0	0	0.830611	5.71517	5.51131	2.53492
lnc-C19orf12-3:1	C19orf12	12.1166	0.103372	0.290485	0	0	0.830611	7.01407	0	3.37989
lnc-C19orf18-2:2	C19orf18	-1.07364	0.942042	0.978182	2.31175	6.13311	2.21496	8.57276	0	0.844973
lnc-C19orf21-3:2	C19orf21	-1.27276	0.800711	0.916919	8.32231	3.21258	5.1221	12.4695	0	0
lnc-C19orf26-2:1	C19orf26	-3.88366	0.186447	0.406524	2.7741	4.52682	0.553741	1.03912	0	0.844973
lnc-C19orf35-1:1	C19orf35	1.83804	0.512263	0.733689	2.86657	8.17748	2.90714	15.3271	0	10.1397
lnc-C19orf6-1:2	C19orf6	1.15738	0.932359	0.976138	0	5.11093	0	5.71517	0	0
lnc-C19orf6-2:1	C19orf6	-6.05995	0.0702875	0.235329	4.80845	6.13311	1.38435	1.03912	0	0.844973
lnc-C19orf6-5:1	C19orf6	-1.18935	0.861128	0.945958	4.62351	1.31424	4.15305	0.519561	0	8.44973
lnc-C19orf77-2:1	C19orf77	-41.9103	0.124781	0.322267	2.03434	0	0.138435	0	0	0
lnc-C1QL4-1:4	C1QL4	9.88948	0.142889	0.347649	0.0924701	0	0	1.2989	0	0
lnc-C1QTNF1-2:1	C1QTNF1	-1.52899	0.791411	0.91288	6.28797	0	0	3.89671	0	0
lnc-C1QTNF1-8:1	C1QTNF1	-1.72142	0.742912	0.886256	2.31175	0.292053	0	0	0	1.68995
lnc-C1QTNF3-2:1	C1QTNF3	-4.01906	0.281989	0.520704	0.462351	3.06656	1.79966	1.03912	0	0
lnc-C1QTNF3-2:3	C1QTNF3	-2.75753	0.301912	0.542184	3.05151	4.67285	11.3517	0.779342	6.12368	0
lnc-C1QTNF8-2:1	C1QTNF8	-1.40641	0.783952	0.909243	3.6988	0	2.63027	4.15649	0	0
lnc-C1QTNF9-3:1	C1QTNF9	-2.23689	0.280442	0.518883	13.6856	4.52682	12.4592	1.2989	3.67421	9.2947
lnc-C1orf112-3:2	C1orf112	-1.18602	0.9125	0.96891	2.12681	2.62848	0	0	0	4.22487
lnc-C1orf132-1:2	C1orf132	-77.6409	0.0387551	0.174044	2.7741	1.31424	0	0	0	0
lnc-C1orf132-1:4	C1orf132	21.5418	0.00137036	0.0314288	0.924701	1.75232	0	32.9921	20.2081	5.06984
lnc-C1orf133-4:1	C1orf133	-1.50265	0.697528	0.862543	4.34609	0.146027	6.36802	3.37715	1.22474	2.53492
lnc-C1orf138-1:1	C1orf138	1.52539	0.752064	0.892587	1.29458	0	1.93809	1.81846	3.06184	0
lnc-C1orf138-4:1	C1orf138	1.15568	0.904483	0.964047	0.462351	2.48245	0	1.81846	0.612368	0.844973
lnc-C1orf144-4:1	C1orf144	16.3974	0.104677	0.293051	0.832231	0	0	2.33802	0	12.6746
lnc-C1orf168-3:1	C1orf168	-2.06062	0.419552	0.656177	0	20.1517	43.0533	5.45539	11.0226	14.3645
lnc-C1orf177-2:1	C1orf177	-36.3542	0.0984895	0.282303	1.01717	0.730133	0.138435	0	0	0
lnc-C1orf180-1:7	C1orf180	-18.8525	0.161117	0.371127	0.924701	0	0	0	0	0
lnc-C1orf185-4:1	C1orf185	-2.91988	0.357808	0.594992	8.41478	2.1904	1.52279	2.33802	0	1.68995
lnc-C1orf186-3:1	C1orf186	4.28922	0.25402	0.486992	1.10964	3.35861	0	14.0281	0	5.06984
lnc-C1orf195-5:1	C1orf195	-5.20073	0.0789725	0.250713	12.4835	8.03146	2.21496	2.59781	0.612368	0.844973
lnc-C1orf201-1:1	C1orf201	-3.15541	0.528694	0.746737	1.66446	1.31424	0	0.779342	0	0
lnc-C1orf201-3:5	C1orf201	17.9145	0.0320471	0.157844	0.462351	0	0	5.45539	0	4.22487
lnc-C1orf201-5:1	C1orf201	28.45	4.04884e-05	0.00446899	6.65785	1.02219	2.63027	194.835	22.6576	78.5825
lnc-C1orf222-1:3	C1orf222	-129.068	0.0167047	0.113964	3.23645	0.292053	3.32244	0	0	0
lnc-C1orf222-1:5	C1orf222	-21.8013	0.00216155	0.0391995	10.4491	16.793	31.7016	0	0.612368	2.53492
lnc-C1orf222-2:2	C1orf222	-1.09138	0.947308	0.980512	2.86657	3.06656	0	2.85759	0	2.53492
lnc-C1orf228-1:1	C1orf228	-1.09004	0.938177	0.97737	1.10964	2.04437	3.18401	0	4.28657	1.68995
lnc-C1orf229-2:1	C1orf229	2.3071	0.459746	0.688801	0.462351	1.75232	1.10748	6.49451	0	0.844973
lnc-C1orf43-3:1	C1orf43	-123.407	0.0131264	0.101469	1.75693	4.67285	0.138435	0	0	0
lnc-C1orf61-2:31	C1orf61	-1.36729	0.807257	0.919551	5.73315	0	0.553741	2.07824	0	2.53492
lnc-C1orf96-1:4	C1orf96	4.5136	0.11898	0.31305	0.832231	1.75232	1.24592	9.09232	0.612368	7.60476
lnc-C1orf98-3:1	C1orf98	-4.04182	0.171992	0.386619	12.0211	16.355	1.52279	0.259781	0	7.60476
lnc-C20orf166-3:2	C20orf166	-1.04944	0.95987	0.987193	6.38044	2.62848	8.58298	12.989	0	3.37989
lnc-C20orf166-5:1	C20orf166	-63.5489	0.0884705	0.266759	3.32892	0	0	0	0	0
lnc-C20orf201-1:1	C20orf201	3.02372	0.455632	0.685575	3.32892	0	0	5.97495	0	4.22487
lnc-C20orf96-3:1	C20orf96	5.60491	0.0282623	0.14797	3.23645	4.23477	0.830611	27.7965	4.28657	14.3645
lnc-C20orf96-4:1	C20orf96	-4.51822	0.130717	0.330164	3.05151	3.21258	2.90714	1.03912	0	0.844973
lnc-C21orf56-1:2	C21orf56	1.00883	0.99434	1	3.97621	0.146027	0	3.89671	0	0
lnc-C21orf58-1:1	C21orf58	1.00661	0.995303	1	3.79127	2.7745	0	6.23473	0	0
lnc-C21orf58-1:2	C21orf58	-15.5176	0.0309657	0.154668	3.23645	4.08874	2.49183	0	0	0.844973
lnc-C21orf62-3:1	C21orf62	3.69091	0.198336	0.421526	0.36988	3.21258	1.93809	0.259781	17.7587	2.53492
lnc-C21orf67-11:1	C21orf67	10.6262	0.0487634	0.196014	1.10964	1.31424	0	11.1706	0	15.2095
lnc-C21orf90-3:1	C21orf90	-3.7583	0.271198	0.508912	3.14398	0.146027	11.6286	2.85759	0	0.844973
lnc-C22orf32-2:1	C22orf32	-18.4313	0.0124971	0.098992	5.2708	2.33642	3.59931	0	0	0.844973
lnc-C22orf32-3:3	C22orf32	3.1077	0.491633	0.715556	0	0	2.3534	0	0	7.60476
lnc-C22orf34-5:1	C22orf34	-2.18477	0.170022	0.383376	53.1703	53.7378	31.0095	21.0422	11.0226	31.264
lnc-C22orf34-7:1	C22orf34	-11.3778	0.0163458	0.113462	7.58255	6.42517	5.53741	0.779342	0	0.844973
lnc-C22orf43-2:1	C22orf43	1.19462	0.829981	0.930074	13.1308	20.0056	39.5924	16.3662	0	70.9777
lnc-C22orf46-3:1	C22orf46	-1.22667	0.78309	0.909243	12.7609	4.9649	4.84523	5.97495	7.34841	5.06984
lnc-C2CD2L-1:1	C2CD2L	2.46789	0.504948	0.726921	1.38705	0	0.553741	3.11737	0	1.68995
lnc-C2CD2L-1:2	C2CD2L	-2.34084	0.536664	0.754198	7.67502	0	0	1.55868	0	1.68995
lnc-C2CD4A-1:1	C2CD4A	60.4213	0.00713462	0.0755305	0	0	0	2.85759	0	0
lnc-C2orf42-1:6	C2orf42	-345.42	0.0141317	0.105369	2.12681	0	16.3353	0	0	0
lnc-C2orf49-1:1	C2orf49	5.27645	0.337096	0.579561	1.10964	0	0	5.19561	0	0.844973
lnc-C2orf54-1:2	C2orf54	48.2497	0.00971166	0.0882438	0.0924701	0	0	7.27385	0	0
lnc-C2orf57-2:1	C2orf57	-13.4289	0.000327425	0.0158212	150.726	129.526	54.9587	7.01407	0.612368	17.7444
lnc-C2orf65-5:1	C2orf65	-114.175	0.0153259	0.110113	1.75693	3.06656	1.24592	0	0	0
lnc-C2orf65-6:1	C2orf65	1.6664	0.642155	0.829099	2.95904	1.02219	0.27687	5.97495	0	0.844973
lnc-C2orf65-6:2	C2orf65	5.13484	0.134872	0.336456	1.20211	0	2.21496	15.0673	0.612368	1.68995
lnc-C2orf67-2:2	C2orf67	-31.7996	0.116624	0.309603	1.47952	0.146027	0	0	0	0
lnc-C2orf78-3:1	C2orf78	-4.86222	0.196119	0.419583	4.62351	0.292053	5.81428	0	0	2.53492
lnc-C2orf82-2:2	C2orf82	5.58929	0.00894905	0.0842713	7.67502	16.501	13.8435	137.164	12.2474	62.528
lnc-C2orf84-2:1	C2orf84	2.98327	0.284524	0.523416	2.31175	4.9649	0.830611	0	20.2081	4.22487
lnc-C2orf89-5:1	C2orf89	1.34471	0.743726	0.886793	19.3263	11.098	0.415305	29.3552	0	11.8296
lnc-C3orf25-1:2	C3orf25	-27.2936	0.15958	0.368975	1.38705	0	0	0	0	0
lnc-C3orf38-3:1	C3orf38	-29.597	0.0020994	0.038621	9.33948	13.5805	15.7816	0	0	1.68995
lnc-C3orf43-1:1	C3orf43	-5.19594	0.270009	0.506964	2.68163	1.02219	0	0.519561	0	0
lnc-C3orf43-2:2	C3orf43	-8.08561	0.237141	0.467683	1.38705	4.52682	0	0	0	0.844973
lnc-C3orf58-7:1	C3orf58	-4.51873	0.0688985	0.233065	5.64068	11.6821	6.50645	2.59781	0	2.53492
lnc-C3orf70-2:1	C3orf70	-1.1962	0.869398	0.948708	2.7741	0.730133	2.07653	2.59781	1.8371	0
lnc-C3orf71-1:1	C3orf71	-1.31843	0.783906	0.909243	5.45574	2.62848	3.46088	0	0	9.2947
lnc-C3orf72-7:1	C3orf72	6.64761	0.0433338	0.185014	1.10964	0.730133	0.692176	7.53364	1.22474	8.44973
lnc-C3orf72-7:2	C3orf72	-12.6037	0.00405675	0.0555466	42.2588	35.9225	22.7034	0.259781	0	8.44973
lnc-C3orf77-6:1	C3orf77	-3.23961	0.169559	0.382966	4.16115	8.32351	8.44454	0.779342	4.89894	0.844973
lnc-C3orf79-8:1	C3orf79	-1.20454	0.78196	0.908951	25.4293	6.57119	41.9458	18.964	3.06184	39.7137
lnc-C3orf79-9:1	C3orf79	-3.42794	0.0361137	0.166658	28.7582	63.0834	76.8315	10.651	17.7587	21.1243
lnc-C4orf26-2:1	C4orf26	-3.5481	0.0513739	0.200635	64.5441	36.5066	17.7197	7.53364	6.12368	20.2794
lnc-C4orf34-12:1	C4orf34	-4.66198	0.273494	0.511652	1.94187	0	1.10748	0	0	0.844973
lnc-C4orf34-3:1	C4orf34	251.804	0.00301414	0.0476389	0	0	0	3.37715	9.18552	0.844973
lnc-C4orf34-5:1	C4orf34	-24.1086	0.122838	0.319207	1.20211	0	0	0	0	0
lnc-C4orf34-7:1	C4orf34	2.66978	0.257221	0.49131	8.13737	3.06656	6.36802	24.1596	0	22.8143
lnc-C4orf47-1:1	C4orf47	-10.4109	0.0592544	0.216121	4.53103	1.75232	1.66122	0.519561	0	0
lnc-C5-1:1	C5	-97.6635	0.0230084	0.134709	2.21928	0.876159	2.07653	0	0	0
lnc-C5orf17-10:1	C5orf17	-6.19532	0.0238209	0.137082	16.7371	26.2848	15.7816	0.779342	7.96078	0.844973
lnc-C5orf17-6:2	C5orf17	-2.13408	0.40469	0.641677	8.41478	7.88543	0.692176	1.03912	6.12368	0.844973
lnc-C5orf30-1:1	C5orf30	2.49747	0.295081	0.535521	4.53103	1.60629	0.27687	3.89671	0	12.6746
lnc-C5orf39-1:13	C5orf39	-1.1577	0.889063	0.958537	7.02773	0	9.27515	8.0532	0	5.91481
lnc-C5orf39-1:6	C5orf39	-2.75073	0.308408	0.54876	2.40422	4.67285	7.33706	4.67605	0	0
lnc-C5orf39-2:1	C5orf39	-172.438	0.0469097	0.192822	0	9.19967	0	0	0	0
lnc-C5orf39-2:2	C5orf39	2.3421	0.539366	0.756258	4.53103	0	0	8.0532	0	2.53492
lnc-C5orf39-3:1	C5orf39	-4.51432	0.0755568	0.243601	4.53103	10.6599	11.2132	2.33802	2.44947	0.844973
lnc-C5orf39-6:1	C5orf39	-9.30834	0.0189508	0.122123	20.066	21.1738	23.6724	0	0	7.60476
lnc-C5orf43-2:1	C5orf43	1.05006	0.974846	0.992986	0.0924701	2.33642	0	2.33802	0	0
lnc-C5orf43-4:10	C5orf43	-2.48016	0.364345	0.600618	2.49669	1.31424	1.93809	1.2989	0	0.844973
lnc-C5orf52-2:1	C5orf52	1.30498	0.845863	0.937481	0	0.292053	0	0.259781	0	0
lnc-C5orf56-2:1	C5orf56	2.07494	0.446458	0.677791	5.73315	2.62848	0.969046	15.0673	0.612368	3.37989
lnc-C5orf58-2:1	C5orf58	-5.84064	0.145017	0.351219	4.62351	0.584106	0.969046	0.779342	0	0
lnc-C5orf60-3:4	C5orf60	-2.17286	0.488887	0.713454	4.16115	7.7394	2.63027	0	6.73605	0
lnc-C5orf60-3:8	C5orf60	-3.59338	0.286801	0.525355	2.68163	5.25695	2.3534	1.81846	0	0.844973
lnc-C6orf100-3:1	C6orf100	-20.4022	0.0012949	0.0308698	14.0555	11.8281	9.41359	0.779342	0	0.844973
lnc-C6orf106-1:1	C6orf106	1.1488	0.849725	0.940213	1.94187	13.7265	13.5666	3.89671	23.8823	5.91481
lnc-C6orf112-2:1	C6orf112	2.78952	0.468923	0.697234	1.01717	0.584106	0.415305	5.45539	0	0
lnc-C6orf112-6:1	C6orf112	-2.23955	0.448332	0.679302	2.58916	1.75232	3.73775	0.519561	0	3.37989
lnc-C6orf120-1:1	C6orf120	1.12109	0.933925	0.976719	2.03434	0	0	2.07824	0	0
lnc-C6orf120-3:1	C6orf120	-264.085	0.0010513	0.0284593	6.38044	4.3808	3.32244	0	0	0
lnc-C6orf120-5:1	C6orf120	-16.0208	0.0242477	0.13749	2.21928	3.65066	1.24592	0.259781	0	0
lnc-C6orf123-3:1	C6orf123	-2.73384	0.620886	0.815066	4.34609	0	0	0	0	1.68995
lnc-C6orf126-1:1	C6orf126	3.88176	0.238496	0.469009	1.29458	1.31424	1.38435	10.3912	0	5.06984
lnc-C6orf146-1:3	C6orf146	-5.82228	0.0660734	0.227942	13.5931	4.67285	8.85985	2.07824	0	2.53492
lnc-C6orf146-12:1	C6orf146	-3.14596	0.068511	0.232268	16.922	33.8781	44.2992	4.67605	11.635	14.3645
lnc-C6orf146-3:3	C6orf146	-3.89878	0.0334581	0.161024	76.3803	76.5179	39.3156	7.01407	6.73605	36.3338
lnc-C6orf164-2:1	C6orf164	-52.5073	0.103144	0.290207	0	0	2.7687	0	0	0
lnc-C6orf195-4:2	C6orf195	-16.5269	0.0289158	0.149762	3.88374	2.04437	4.56836	0	0	0.844973
lnc-C6orf201-11:1	C6orf201	-8.98975	0.0204819	0.12799	10.7265	10.5139	5.39897	1.81846	0	0.844973
lnc-C6orf201-15:1	C6orf201	-158.524	0.00299771	0.0474909	3.42139	3.21258	1.79966	0	0	0
lnc-C6orf201-2:1	C6orf201	63.3512	0.0207333	0.128067	0	0	0	3.11737	0	0
lnc-C6orf201-20:2	C6orf201	-37.7196	0.011597	0.0961282	3.6988	5.54901	15.7816	0	0	0.844973
lnc-C6orf201-4:1	C6orf201	7.98313	0.0189959	0.122123	19.4187	9.3457	2.7687	149.114	0	103.087
lnc-C6orf201-5:1	C6orf201	-269.234	0.00207234	0.0382463	0.27741	5.40298	8.72141	0	0	0
lnc-C6orf201-9:1	C6orf201	-23.9489	0.0328008	0.159606	2.03434	5.40298	2.7687	0.259781	0	0
lnc-C6orf221-2:2	C6orf221	-4.22787	0.0268392	0.144407	39.8546	40.0113	46.9295	1.55868	12.2474	16.8995
lnc-C6orf223-3:2	C6orf223	8.18605	0.00613869	0.0690577	7.49008	1.89834	5.39897	69.6212	3.67421	48.1635
lnc-C6orf228-5:1	C6orf228	-2.67739	0.129498	0.32835	12.0211	16.9391	14.2588	5.71517	3.67421	6.75978
lnc-C6orf70-2:2	C6orf70	24.2556	0.00413156	0.0560398	0.832231	0	1.10748	30.6541	0	17.7444
lnc-C6orf70-2:3	C6orf70	-60.6083	0.0743057	0.241223	1.29458	1.89834	0	0	0	0
lnc-C6orf70-5:1	C6orf70	4.24503	0.211866	0.43744	1.01717	1.16821	0	3.63693	0	5.91481
lnc-C6orf94-1:1	C6orf94	2.66791	0.238534	0.469009	14.8877	5.40298	7.4755	39.4866	0	34.6439
lnc-C6orf99-7:2	C6orf99	1.4869	0.738859	0.884241	1.01717	3.35861	0	3.11737	0	3.37989
lnc-C7orf10-4:1	C7orf10	-256.854	0.0107295	0.0924461	0	3.06656	10.6595	0	0	0
lnc-C7orf10-8:1	C7orf10	-4.38955	0.191991	0.414149	4.43856	0.292053	1.24592	1.03912	0	0
lnc-C7orf11-1:2	C7orf11	-1.17183	0.865971	0.947292	3.14398	3.35861	1.10748	5.19561	0	0.844973
lnc-C7orf11-3:1	C7orf11	-1.0188	0.98511	0.998606	3.42139	0.43808	2.7687	3.11737	0	3.37989
lnc-C7orf11-6:1	C7orf11	1.59303	0.664412	0.843518	3.42139	0	1.52279	5.97495	0	1.68995
lnc-C7orf11-9:1	C7orf11	3.41275	0.166841	0.379149	4.16115	1.60629	2.07653	17.4053	0	9.2947
lnc-C7orf30-3:1	C7orf30	-2.29007	0.486235	0.711236	3.42139	0.876159	0	1.55868	0	0
lnc-C7orf34-1:1	C7orf34	-4.23882	0.188204	0.409162	1.20211	2.04437	2.63027	1.03912	0	0
lnc-C7orf42-4:1	C7orf42	-46.0507	0.114693	0.308151	1.57199	0	0.830611	0	0	0
lnc-C7orf55-1:2	C7orf55	-113.299	0.0187738	0.122012	1.47952	2.1904	2.3534	0	0	0
lnc-C7orf71-4:1	C7orf71	-62.1923	0.076682	0.245623	0.36988	2.92053	0	0	0	0
lnc-C7orf71-6:1	C7orf71	-2.61333	0.244926	0.476477	18.9564	20.0056	9.82889	2.33802	0	16.8995
lnc-C8orf12-2:1	C8orf12	14.9459	0.12508	0.322732	0	0.146027	0	2.59781	0	0
lnc-C8orf31-1:2	C8orf31	38.8692	0.0303188	0.152949	0	0	0	1.81846	0	0
lnc-C8orf45-1:1	C8orf45	-6.04529	0.243904	0.475113	1.47952	0	6.22958	1.03912	0	0
lnc-C8orf46-1:3	C8orf46	53.2067	0.0296643	0.151817	0	0	0	2.59781	0	0
lnc-C8orf58-2:2	C8orf58	-55.5481	0.0610481	0.219361	0.739761	2.1904	0	0	0	0
lnc-C8orf59-1:1	C8orf59	2.47553	0.359429	0.596362	1.29458	0.584106	6.78332	17.6651	0	3.37989
lnc-C8orf83-8:1	C8orf83	9.29822	0.00427038	0.0564882	8.13737	1.02219	12.736	138.463	8.57315	56.6132
lnc-C8orf84-3:1	C8orf84	-36.7782	8.75151e-05	0.00736549	14.1479	19.1295	44.1608	1.55868	0	0
lnc-C8orf86-1:5	C8orf86	-1.0334	0.967868	0.990223	2.95904	5.69503	5.1221	6.49451	0	6.75978
lnc-C9orf102-11:1	C9orf102	10.0375	0.00782312	0.0784994	11.3738	10.0758	10.7979	161.064	0	163.08
lnc-C9orf103-3:2	C9orf103	-6.31067	0.224817	0.452118	8.0449	0	0	1.03912	0	0
lnc-C9orf104-5:1	C9orf104	-30.6603	0.175316	0.3897	1.57199	0	0	0	0	0
lnc-C9orf118-1:1	C9orf118	-131.991	0.0184411	0.120899	2.21928	4.52682	0.27687	0	0	0
lnc-C9orf129-1:2	C9orf129	-136.585	0.00946173	0.0870299	1.10964	4.23477	1.93809	0	0	0
lnc-C9orf135-2:1	C9orf135	-4.52947	0.441841	0.674431	5.45574	0	0	1.03912	0	0
lnc-C9orf146-2:6	C9orf146	-41.5264	0.0717497	0.237584	1.8494	0.292053	0	0	0	0
lnc-C9orf146-7:1	C9orf146	-71.4441	0.0187398	0.121956	1.20211	1.60629	0.969046	0	0	0
lnc-C9orf150-1:1	C9orf150	-11.5834	0.0019695	0.0373539	21.8229	18.2533	48.7292	2.07824	0	5.91481
lnc-C9orf152-5:1	C9orf152	-1.12539	0.917919	0.9716	2.03434	7.7394	1.66122	0	6.12368	4.22487
lnc-C9orf152-7:1	C9orf152	-1.21041	0.819571	0.923852	2.68163	7.88543	18.2734	0.519561	8.57315	15.2095
lnc-C9orf171-4:1	C9orf171	6.69673	0.0344486	0.162653	6.28797	0.146027	2.3534	33.5117	14.6968	10.9846
lnc-C9orf21-1:1	C9orf21	1.09538	0.921021	0.972151	6.84279	7.7394	4.56836	18.7042	0	1.68995
lnc-C9orf30-1:3	C9orf30	-2.23412	0.290465	0.528942	132.047	77.8321	49.1445	84.9482	0	30.419
lnc-C9orf37-1:1	C9orf37	-3.59158	0.233813	0.463297	12.9458	9.19967	1.79966	1.03912	0	5.91481
lnc-C9orf4-1:1	C9orf4	-17.6197	0.0862589	0.262322	0.924701	0.292053	11.3517	0.519561	0	0
lnc-C9orf4-1:2	C9orf4	1.59713	0.787669	0.911546	3.14398	1.02219	0	0	6.73605	0
lnc-C9orf47-2:1	C9orf47	-61.6379	0.000395352	0.0170528	4.34609	6.27914	38.485	0.519561	0	0
lnc-C9orf50-3:1	C9orf50	-1.53326	0.625311	0.818303	4.34609	1.46027	5.53741	5.45539	0.612368	0.844973
lnc-C9orf53-1:1	C9orf53	1.21979	0.826638	0.92809	3.60633	2.1904	3.18401	8.0532	0	2.53492
lnc-C9orf57-4:1	C9orf57	272.852	1.59883e-05	0.0022904	0.0924701	0	0	30.9139	0.612368	12.6746
lnc-C9orf57-4:3	C9orf57	-1.05457	0.961786	0.987437	2.12681	2.92053	0.415305	2.59781	0	2.53492
lnc-C9orf64-1:1	C9orf64	1.0417	0.963507	0.988326	3.51386	0.730133	3.32244	1.55868	5.51131	0.844973
lnc-C9orf64-1:2	C9orf64	-33.4399	0.138371	0.340766	0	1.75232	0	0	0	0
lnc-C9orf66-6:1	C9orf66	-25.4314	0.215289	0.441739	1.29458	0	0	0	0	0
lnc-C9orf66-7:1	C9orf66	4.64818	0.062607	0.222445	4.71598	7.7394	12.1823	66.244	0	48.1635
lnc-C9orf69-1:2	C9orf69	4.02156	0.285324	0.524315	0	1.75232	0	6.75429	0	0
lnc-C9orf69-1:3	C9orf69	1.41049	0.714437	0.875237	6.28797	1.16821	1.93809	8.83254	0	4.22487
lnc-C9orf69-3:1	C9orf69	-113.09	0.0368468	0.16881	2.12681	0	3.87618	0	0	0
lnc-C9orf85-1:1	C9orf85	2.85277	0.419153	0.655798	2.03434	0	0	4.15649	0	1.68995
lnc-C9orf91-1:1	C9orf91	-1.38659	0.85119	0.941348	0.36988	2.04437	0	1.55868	0	0
lnc-C9orf92-3:1	C9orf92	-25.9992	0.00157072	0.0335194	26.169	21.3199	26.5795	0	0	3.37989
lnc-CA10-1:1	CA10	-1.52222	0.736648	0.883162	1.20211	1.75232	0.415305	0	0	2.53492
lnc-CA5A-4:3	CA5A	-6.05034	0.0654279	0.22761	6.38044	13.5805	7.19863	3.89671	0	0
lnc-CA5A-8:1	CA5A	-2.48424	0.310266	0.550903	12.2061	5.25695	5.39897	0	6.12368	3.37989
lnc-CA7-4:1	CA7	6.56427	0.209109	0.433675	3.05151	0	0.553741	20.5227	0	3.37989
lnc-CA8-13:3	CA8	1.09703	0.939933	0.977878	3.6988	3.94272	0	2.59781	0	5.91481
lnc-CA8-5:1	CA8	-6.80768	0.105659	0.294211	6.28797	1.46027	1.52279	0	0	1.68995
lnc-CA8-5:5	CA8	-2.94772	0.436768	0.668953	6.1955	2.33642	0	2.59781	0	0
lnc-CA8-5:6	CA8	5.04448	0.0812281	0.254483	4.25362	1.16821	5.39897	48.3192	0	5.91481
lnc-CAB39L-4:2	CAB39L	38.6193	1.25631e-05	0.00214562	1.10964	2.1904	2.49183	165.22	39.1915	19.4344
lnc-CABIN1-1:1	CABIN1	-4.49508	0.0587061	0.215053	21.2681	17.0851	21.0421	4.15649	0	9.2947
lnc-CACNA1E-5:2	CACNA1E	-1.96248	0.399151	0.635489	12.1136	4.3808	9.41359	4.15649	0	9.2947
lnc-CACYBP-2:1	CACYBP	-423.969	0.000582218	0.0204478	4.71598	1.89834	16.0585	0	0	0
lnc-CACYBP-3:1	CACYBP	8.19132	0.153408	0.361142	1.66446	0.146027	0	0	5.51131	10.1397
lnc-CADM2-12:1	CADM2	-20.4602	0.173295	0.387126	1.01717	0	0	0	0	0
lnc-CALCOCO1-3:1	CALCOCO1	2.13247	0.523432	0.742576	2.7741	0	1.10748	3.37715	0	5.06984
lnc-CALCOCO2-1:1	CALCOCO2	-1.87539	0.74562	0.888251	3.6988	0	0	1.81846	0	0
lnc-CALCOCO2-6:1	CALCOCO2	-1	1	1	0	0	0	0	0	0
lnc-CALCOCO2-8:4	CALCOCO2	1.74838	0.555631	0.768818	5.08586	2.62848	4.70679	7.79342	3.06184	10.9846
lnc-CALCR-1:1	CALCR	-108.05	0.0239549	0.137479	2.86657	1.75232	1.10748	0	0	0
lnc-CALCRL-1:1	CALCRL	-171.797	0.010613	0.0922997	2.40422	2.04437	4.70679	0	0	0
lnc-CALHM1-1:3	CALHM1	-39.1667	0.0972153	0.281044	1.01717	1.02219	0	0	0	0
lnc-CALM1-2:1	CALM1	-43.5496	0.0965641	0.280204	1.57199	0	0.692176	0	0	0
lnc-CALM1-7:1	CALM1	-161.868	0.0138916	0.104262	2.03434	1.60629	4.98366	0	0	0
lnc-CALM2-2:6	CALM2	-44.2538	0.059157	0.216082	1.8494	0.43808	0	0	0	0
lnc-CALML3-1:1	CALML3	63.7416	0.00213898	0.0389892	0.647291	0	0	40.0062	0	6.75978
lnc-CALML4-1:1	CALML4	-5.15106	0.156495	0.364759	6.84279	10.0758	0	2.85759	0	0
lnc-CALN1-1:2	CALN1	1.41625	0.732995	0.883162	9.43195	5.69503	0.830611	22.0813	0	0
lnc-CAMK1-1:2	CAMK1	5.15637	0.136849	0.338682	0.27741	2.7745	0	3.89671	11.0226	0.844973
lnc-CAMK2G-1:1	CAMK2G	3.44104	0.266489	0.503302	0.0924701	2.04437	4.70679	17.4053	0	5.91481
lnc-CAMK2N1-3:1	CAMK2N1	1.92861	0.497231	0.72121	4.43856	1.16821	1.79966	12.989	0	0.844973
lnc-CAMK2N2-1:1	CAMK2N2	3.14574	0.261398	0.496571	8.9696	4.08874	0	27.5367	0	13.5196
lnc-CAMKK2-1:1	CAMKK2	-2.30742	0.409096	0.646431	2.95904	2.04437	1.93809	1.2989	0	1.68995
lnc-CAMKK2-2:1	CAMKK2	-3.87519	0.0775124	0.247576	10.6341	14.1646	4.15305	3.11737	2.44947	1.68995
lnc-CAMKMT-1:1	CAMKMT	-163.287	0.0118142	0.096888	1.20211	5.98709	1.52279	0	0	0
lnc-CAMSAP2-1:1	CAMSAP2	-17.6916	0.0482072	0.19506	5.08586	5.40298	1.38435	0	0	0.844973
lnc-CAMSAP2-5:1	CAMSAP2	-11.7037	0.000704115	0.0231412	44.1082	29.3513	26.3027	0.519561	4.28657	4.22487
lnc-CAMTA1-2:3	CAMTA1	-6.00012	0.169994	0.383376	3.51386	3.79669	11.2132	0	0	3.37989
lnc-CAND2-2:1	CAND2	-84.7004	0.0511691	0.199964	3.32892	0.584106	0.553741	0	0	0
lnc-CANX-1:2	CANX	10.0074	0.0152974	0.11004	4.80845	1.46027	4.84523	65.2049	0	46.4735
lnc-CANX-1:4	CANX	4.00647	0.220385	0.446675	2.40422	0	7.61393	29.8748	0	10.1397
lnc-CAPN2-2:2	CAPN2	-8.51291	0.0312546	0.155419	2.86657	17.5232	14.1204	0.259781	3.06184	0.844973
lnc-CAPN2-3:1	CAPN2	4.4056	0.243622	0.474901	0	2.33642	3.46088	19.4835	0	5.91481
lnc-CAPRIN2-1:1	CAPRIN2	-1.2548	0.843479	0.936277	0	1.89834	1.52279	2.33802	0	0
lnc-CAPS-2:1	CAPS	-109.475	0.0118519	0.0970785	4.34609	0.876159	0.553741	0	0	0
lnc-CAPS-3:1	CAPS	-76.3351	0.0241736	0.13749	1.01717	2.33642	0.692176	0	0	0
lnc-CASK-4:1	CASK	-1.4311	0.770575	0.90341	1.57199	0	3.46088	0	1.22474	2.53492
lnc-CASKIN2-1:1	CASKIN2	-1.61514	0.677088	0.852276	9.24701	0.43808	4.01462	8.0532	0	0
lnc-CASKIN2-1:2	CASKIN2	2.9284	0.350906	0.591106	0.462351	0.292053	0	0.779342	0	1.68995
lnc-CASP10-1:1	CASP10	-128.484	0.0203238	0.127628	1.29458	5.54901	0	0	0	0
lnc-CASP3-1:5	CASP3	-2.83022	0.141945	0.346525	10.3567	15.9169	7.4755	2.59781	3.67421	5.91481
lnc-CASP8-1:1	CASP8	6.10788	0.0732224	0.23944	1.01717	4.9649	0.27687	26.2378	0	11.8296
lnc-CASP8-2:1	CASP8	1.85716	0.545548	0.761763	5.17833	1.02219	2.21496	2.59781	7.34841	5.91481
lnc-CASP9-1:1	CASP9	-14.204	0.0157453	0.11171	7.85996	13.2884	3.18401	0.779342	0	0.844973
lnc-CAV2-2:1	CAV2	-52.2708	0.000582211	0.0204478	12.2985	6.27914	13.0129	0	0	0.844973
lnc-CBFA2T3-1:1	CBFA2T3	-1.40263	0.788094	0.911723	1.20211	0.876159	2.7687	3.11737	0	0
lnc-CBR3-2:1	CBR3	2.77581	0.296186	0.536513	1.8494	0.584106	0.692176	2.33802	0	6.75978
lnc-CBR4-1:1	CBR4	-24.1026	0.123637	0.320692	1.20211	0	0	0	0	0
lnc-CBWD2-2:1	CBWD2	-7.90092	0.173453	0.38735	1.38705	3.21258	0.830611	0	0	0.844973
lnc-CBWD5-2:9	CBWD5	-1.64912	0.546197	0.762028	13.778	14.8947	6.36802	2.59781	0.612368	18.5894
lnc-CBWD6-1:1	CBWD6	-3.30605	0.354347	0.592949	13.3157	2.48245	0	4.41627	0	0
lnc-CBX2-5:1	CBX2	-119.387	0.0190184	0.122123	2.12681	3.94272	0.27687	0	0	0
lnc-CBY3-1:1	CBY3	-5.47667	0.0981044	0.282072	7.39761	10.2219	3.04557	2.59781	0	0.844973
lnc-CBY3-3:1	CBY3	-1.61398	0.740287	0.884748	3.42139	1.89834	0.138435	3.11737	0	0
lnc-CCAR1-3:1	CCAR1	-1.26896	0.69554	0.861809	22.0079	22.6341	23.1187	5.97495	22.6576	25.3492
lnc-CCBP2-3:2	CCBP2	-8.22193	0.337231	0.579561	0.36988	0	0	0	0	0
lnc-CCDC107-1:2	CCDC107	-95.2945	0.0543252	0.20545	3.14398	1.89834	0	0	0	0
lnc-CCDC111-1:1	CCDC111	-9.58341	0.0428799	0.183775	8.0449	1.60629	3.04557	0	0	1.68995
lnc-CCDC111-2:4	CCDC111	-7.15841	0.293006	0.532472	2.7741	0	0	0.259781	0	0
lnc-CCDC114-1:1	CCDC114	-2.04063	0.444516	0.67681	6.38044	2.92053	12.4592	6.23473	0	4.22487
lnc-CCDC117-1:6	CCDC117	2.00565	0.539939	0.756589	2.49669	2.04437	0.830611	4.15649	0	6.75978
lnc-CCDC125-1:3	CCDC125	-1.42092	0.833018	0.931832	0.36988	0.146027	0	0.259781	0	0
lnc-CCDC125-22:1	CCDC125	-1.37991	0.809332	0.919703	1.66446	1.75232	3.18401	0	0	5.06984
lnc-CCDC137-1:1	CCDC137	1.27396	0.834044	0.932517	2.03434	2.62848	0	2.59781	0	3.37989
lnc-CCDC144NL-8:1	CCDC144NL	-2.00979	0.604776	0.802514	0.554821	1.31424	2.90714	2.07824	0	0
lnc-CCDC157-3:1	CCDC157	-7.75049	0.0359919	0.166532	5.45574	8.61556	6.50645	1.55868	0	0.844973
lnc-CCDC159-1:1	CCDC159	-32.5291	0.128901	0.328124	1.66446	0	0	0	0	0
lnc-CCDC159-4:1	CCDC159	-125.551	0.0284643	0.148566	0	6.27914	0.415305	0	0	0
lnc-CCDC166-2:1	CCDC166	-8.86542	0.106402	0.295426	0.924701	0	13.2898	1.2989	0	0
lnc-CCDC17-3:1	CCDC17	1.00673	0.995454	1	1.29458	0	5.95271	2.33802	0	5.06984
lnc-CCDC17-5:1	CCDC17	1.7117	0.677478	0.85229	1.94187	0	1.24592	5.19561	0	0
lnc-CCDC18-2:1	CCDC18	-1.96408	0.430341	0.66379	14.0555	12.5583	4.29149	6.49451	0	9.2947
lnc-CCDC33-2:1	CCDC33	-2.16964	0.449301	0.679655	8.9696	1.31424	8.99828	0	7.34841	1.68995
lnc-CCDC33-3:1	CCDC33	1.35419	0.648268	0.832689	12.9458	12.1202	4.01462	6.75429	15.3092	17.7444
lnc-CCDC33-3:2	CCDC33	-3.53975	0.249986	0.482971	6.65785	5.25695	1.52279	0	0	4.22487
lnc-CCDC38-5:1	CCDC38	2.80087	0.437814	0.669955	1.10964	0.43808	1.38435	0	6.73605	1.68995
lnc-CCDC40-2:2	CCDC40	-1.03722	0.97827	0.994518	3.14398	1.31424	0.553741	0	4.89894	0
lnc-CCDC40-2:5	CCDC40	-41.0694	0.131431	0.331238	2.12681	0	0	0	0	0
lnc-CCDC51-1:2	CCDC51	-112.193	0.0236875	0.136844	5.91809	0	0	0	0	0
lnc-CCDC51-3:1	CCDC51	43.5978	0.000292864	0.0149665	0	2.04437	0.969046	86.2471	1.22474	43.9386
lnc-CCDC56-1:1	CCDC56	-7.28009	0.0225759	0.133415	8.78466	9.78378	16.3353	1.55868	0	3.37989
lnc-CCDC64-1:1	CCDC64	1.16238	0.869145	0.948708	4.53103	5.84106	2.49183	12.7292	0	1.68995
lnc-CCDC7-2:1	CCDC7	-1.84464	0.668233	0.845398	1.94187	3.35861	0	2.59781	0	0
lnc-CCDC77-2:1	CCDC77	-3.60918	0.13811	0.340445	8.32231	9.3457	4.84523	4.15649	0	1.68995
lnc-CCDC77-5:2	CCDC77	-6.24683	0.215826	0.442093	4.34609	0	5.39897	1.2989	0	0
lnc-CCDC8-2:1	CCDC8	-1.2983	0.809637	0.919703	4.71598	1.89834	1.24592	0.519561	0	5.91481
lnc-CCDC80-3:1	CCDC80	1.73641	0.694916	0.861218	2.49669	0	0	4.15649	0	0
lnc-CCDC81-2:1	CCDC81	-5.42693	0.139202	0.341812	3.23645	3.94272	0.27687	0.519561	0	0.844973
lnc-CCDC82-7:1	CCDC82	1.25796	0.871807	0.949818	1.01717	2.7745	0.692176	0	0	5.91481
lnc-CCDC85A-5:1	CCDC85A	1.91044	0.563594	0.774935	3.32892	1.16821	0	0.779342	5.51131	2.53492
lnc-CCDC85C-4:1	CCDC85C	-91.7257	0.0137473	0.104262	1.47952	1.16821	2.21496	0	0	0
lnc-CCDC87-1:1	CCDC87	-5.2498	0.044303	0.18696	13.1308	8.61556	5.26053	3.11737	0	1.68995
lnc-CCDC90A-8:1	CCDC90A	-1.94064	0.464364	0.693098	9.52442	7.59338	4.15305	1.2989	0	10.1397
lnc-CCDC93-2:4	CCDC93	-2.33515	0.470317	0.698114	2.7741	2.92053	0	2.07824	0	0
lnc-CCDC93-4:4	CCDC93	-5.839	0.0406098	0.178631	5.64068	18.1073	25.1952	1.55868	6.73605	0
lnc-CCDC96-1:1	CCDC96	-3.49846	0.250748	0.483749	3.51386	6.71722	4.15305	3.63693	0	0
lnc-CCDC96-2:1	CCDC96	-35.914	0.136458	0.338282	1.8494	0	0	0	0	0
lnc-CCDC96-3:1	CCDC96	-2.1312	0.387616	0.623464	10.3567	3.65066	4.42992	6.49451	0	1.68995
lnc-CCL18-3:1	CCL18	-178.312	0.00283534	0.0459369	1.75693	5.54901	2.21496	0	0	0
lnc-CCL20-1:1	CCL20	-46.2559	0.0492818	0.197274	1.38705	1.02219	0	0	0	0
lnc-CCL25-1:1	CCL25	-15.3845	0.000293418	0.0149665	65.0065	42.7858	77.6621	5.97495	0	5.91481
lnc-CCL27-2:1	CCL27	-226.063	0.0128408	0.100182	0	5.98709	6.09115	0	0	0
lnc-CCL4-2:1	CCL4	-12.3805	0.0229844	0.134709	5.45574	7.44735	3.46088	0	0	1.68995
lnc-CCL4L1-1:1	CCL4L1	-1.05159	0.952488	0.983907	11.3738	2.04437	4.84523	13.5086	0	3.37989
lnc-CCL4L2-1:1	CCL4L2	-2.2262	0.186781	0.407027	65.7462	41.3255	40.1462	17.9249	12.2474	36.3338
lnc-CCL5-2:1	CCL5	3.60207	0.0168374	0.114083	198.811	248.391	280.885	451.758	1043.47	1128.04
lnc-CCL5-3:1	CCL5	-1.02919	0.982388	0.99673	1.57199	2.33642	0	0	3.06184	0.844973
lnc-CCNF-2:1	CCNF	1.24811	0.836008	0.933553	4.80845	0	5.81428	5.71517	0	7.60476
lnc-CCNF-4:4	CCNF	63.7888	0.0159404	0.112267	0	0	0	3.11737	0	0
lnc-CCNH-3:1	CCNH	-120.559	0.00652595	0.0716063	1.47952	1.75232	3.18401	0	0	0
lnc-CCNL1-5:1	CCNL1	-2.77828	0.202935	0.426322	15.35	4.9649	5.1221	3.37715	0	5.91481
lnc-CCNL2-3:2	CCNL2	-160.617	0.0161924	0.11302	2.86657	0.146027	5.53741	0	0	0
lnc-CCNL2-4:2	CCNL2	1.49743	0.748486	0.889752	4.16115	0	5.81428	12.989	0	1.68995
lnc-CCNT1-1:1	CCNT1	-5.69752	0.224352	0.451823	0	7.1553	1.24592	0	0	1.68995
lnc-CCNY-4:1	CCNY	128.07	0.00424001	0.0564882	0	0	0	5.71517	0	0.844973
lnc-CCNYL2-6:1	CCNYL2	-200.149	0.0182914	0.120387	0.739761	2.1904	7.75237	0	0	0
lnc-CCNYL2-9:1	CCNYL2	-1.79622	0.343342	0.58364	14.4253	16.647	16.3353	8.31298	12.8597	5.06984
lnc-CCP110-1:1	CCP110	-6.20585	0.0835972	0.258455	17.4768	13.1424	6.92176	0.519561	0	5.91481
lnc-CCR8-4:1	CCR8	-2.99467	0.145799	0.352356	79.4318	25.2626	14.8126	17.1455	0	22.8143
lnc-CCT4-2:1	CCT4	-1.91356	0.505407	0.727382	6.47291	5.11093	4.56836	0	6.12368	2.53492
lnc-CCT5-1:1	CCT5	-4.57464	0.257774	0.492226	3.97621	3.79669	2.63027	1.2989	0	0.844973
lnc-CCT5-2:1	CCT5	-1.34778	0.735214	0.883162	4.62351	4.9649	6.50645	5.19561	0	6.75978
lnc-CD109-5:1	CD109	-2.89336	0.254284	0.487359	3.88374	5.25695	3.04557	1.81846	0.612368	1.68995
lnc-CD164-1:1	CD164	-5.91155	0.0535014	0.204209	4.90092	6.86325	24.0877	1.2989	0	5.06984
lnc-CD180-3:1	CD180	1.1352	0.877312	0.951874	13.5931	8.46954	1.38435	21.8216	0	4.22487
lnc-CD180-6:1	CD180	1.0754	0.926098	0.973765	3.88374	1.46027	14.3973	9.61188	0.612368	10.9846
lnc-CD180-7:2	CD180	-2.69555	0.458503	0.688074	3.79127	6.71722	0.138435	0	0	4.22487
lnc-CD1B-1:1	CD1B	1.00784	0.994898	1	1.75693	1.75232	1.38435	0.259781	0	5.06984
lnc-CD1D-2:2	CD1D	-23.6826	0.234002	0.463528	1.20211	0	0	0	0	0
lnc-CD34-4:1	CD34	1.8419	0.487695	0.712444	5.08586	1.31424	4.42992	13.7684	0	5.91481
lnc-CD3G-1:1	CD3G	5.62561	0.319222	0.561621	1.01717	0	0	0	6.12368	0
lnc-CD40-2:1	CD40	1.8849	0.540129	0.756698	6.47291	0	3.18401	13.7684	0	4.22487
lnc-CD46-1:1	CD46	6.76069	0.0949332	0.277871	1.66446	0	1.24592	9.61188	3.67421	6.75978
lnc-CD46-2:1	CD46	12.4373	0.134668	0.336185	0	0.146027	0	0	0	2.53492
lnc-CD46-4:1	CD46	2.16831	0.465608	0.693877	2.68163	2.33642	0.692176	2.59781	0	10.1397
lnc-CD46-5:1	CD46	-36.2705	0.192097	0.414149	0	1.89834	0	0	0	0
lnc-CD46-5:2	CD46	2.86215	0.46486	0.693397	1.8494	0	0.830611	7.53364	0	0
lnc-CD47-4:1	CD47	-29.2717	0.00355908	0.0520455	2.21928	23.6563	4.15305	0.259781	0	0.844973
lnc-CD72-1:1	CD72	2.19791	0.531798	0.75002	3.32892	0	1.79966	5.45539	0	5.91481
lnc-CD80-2:1	CD80	-112.08	0.0168001	0.114083	2.58916	3.35861	0	0	0	0
lnc-CD9-1:1	CD9	-2.56264	0.314302	0.555141	4.71598	3.50464	6.50645	0	4.28657	1.68995
lnc-CD99-2:8	CD99	-37.262	0.108349	0.298281	1.20211	0.730133	0	0	0	0
lnc-CDC123-2:1	CDC123	-1.5433	0.796822	0.915089	1.8494	0	0	1.03912	0	0
lnc-CDC14B-1:1	CDC14B	4.20061	0.197581	0.420496	5.36327	2.04437	0	9.61188	0	21.9693
lnc-CDC25B-2:1	CDC25B	-2.7043	0.360442	0.59716	2.86657	2.33642	1.52279	2.07824	0	0
lnc-CDC27-2:3	CDC27	2.68053	0.357128	0.594447	8.32231	5.98709	0.830611	12.989	0	27.8841
lnc-CDC27-7:1	CDC27	-7.77968	0.0436705	0.185946	37.8203	10.6599	19.2425	3.63693	0	5.06984
lnc-CDC27-7:3	CDC27	-1.35674	0.717475	0.876098	32.8269	2.33642	3.87618	20.7824	0	7.60476
lnc-CDC27-7:4	CDC27	-6.36227	0.124041	0.321185	5.17833	8.76159	0	1.81846	0	0
lnc-CDC27-7:5	CDC27	-2.30577	0.538804	0.756047	1.01717	1.75232	0.553741	0	0	1.68995
lnc-CDC42-3:1	CDC42	-6.90682	0.0607454	0.218866	4.43856	6.27914	1.10748	0.779342	0	0.844973
lnc-CDC42BPA-2:1	CDC42BPA	-8.27665	0.0085807	0.0826521	64.8215	89.8063	90.675	0	9.18552	21.1243
lnc-CDC42SE1-1:2	CDC42SE1	-1.3116	0.868217	0.948708	4.34609	2.04437	0	0	0	5.06984
lnc-CDC42SE1-1:3	CDC42SE1	1.85378	0.471515	0.69943	3.23645	0.730133	2.07653	4.15649	6.12368	0.844973
lnc-CDC7-1:1	CDC7	10.9645	0.11687	0.309799	0	0.43808	0	2.59781	0	2.53492
lnc-CDC7-1:4	CDC7	-2.29413	0.196836	0.419791	43.8308	28.7672	25.3336	32.7323	3.06184	5.91481
lnc-CDCA7L-2:1	CDCA7L	30.0583	0.000304896	0.0153199	1.38705	3.50464	0	111.186	11.0226	25.3492
lnc-CDH10-4:1	CDH10	-4.63995	0.339841	0.580749	0	1.75232	0.138435	0.259781	0	0
lnc-CDH10-6:1	CDH10	-88.6547	0.0564358	0.209819	0.18494	4.52682	0	0	0	0
lnc-CDH11-5:1	CDH11	-5.39346	0.0296734	0.151817	132.88	23.6563	42.4996	27.7965	0	8.44973
lnc-CDH12-1:2	CDH12	-2.00987	0.611655	0.807662	1.8494	0	2.3534	1.81846	0	0
lnc-CDH16-1:2	CDH16	-266.001	0.0095046	0.0872677	0.36988	0	13.8435	0	0	0
lnc-CDH3-5:1	CDH3	-45.52	0.0568759	0.210757	0.924701	1.46027	0	0	0	0
lnc-CDH3-6:1	CDH3	1.35767	0.835282	0.933437	1.66446	0.584106	0	2.85759	0	0
lnc-CDH5-15:1	CDH5	-1.25491	0.79363	0.913893	2.03434	5.84106	4.29149	6.75429	0	2.53492
lnc-CDH5-3:3	CDH5	-1.9139	0.382536	0.618896	10.1717	6.71722	6.78332	4.15649	0	8.44973
lnc-CDH5-4:1	CDH5	-2.00988	0.564629	0.775076	1.57199	1.46027	1.38435	0	0	2.53492
lnc-CDH5-9:1	CDH5	-628.9	1.37577e-05	0.00220549	20.8058	9.05364	3.73775	0	0	0
lnc-CDH6-15:1	CDH6	-11.4202	0.00934876	0.0867906	9.61689	6.86325	14.951	0.519561	0	2.53492
lnc-CDH8-3:1	CDH8	-2.3976	0.562309	0.773939	4.34609	0	0	0.259781	0	1.68995
lnc-CDIPT-1:9	CDIPT	-2.05767	0.507526	0.729698	8.32231	3.79669	0	2.07824	3.67421	0
lnc-CDK1-7:1	CDK1	1.25287	0.891289	0.959708	3.23645	0	0	3.89671	0	0
lnc-CDK12-1:3	CDK12	-12.6175	0.00915186	0.0855826	13.1308	5.11093	15.3663	1.55868	0	0.844973
lnc-CDK18-1:2	CDK18	9.03815	0.0504954	0.199281	0	3.35861	4.84523	45.7214	3.06184	25.3492
lnc-CDK19-1:1	CDK19	2.68833	0.150049	0.357874	11.6512	12.9964	7.19863	8.31298	64.911	12.6746
lnc-CDK20-12:1	CDK20	-388.284	0.00893785	0.0842713	0	0	20.7653	0	0	0
lnc-CDK5R2-4:1	CDK5R2	-24.6487	0.166669	0.379115	1.10964	0	0.138435	0	0	0
lnc-CDKAL1-5:1	CDKAL1	-57.5246	0.0709132	0.236324	1.8494	1.16821	0	0	0	0
lnc-CDKL5-2:1	CDKL5	-19.5707	0.00677572	0.0733455	11.2814	15.3328	0.415305	0.519561	0	0.844973
lnc-CDKN2AIPNL-4:1	CDKN2AIPNL	1.01694	0.988528	0.999964	0.924701	0	8.16767	7.27385	0	1.68995
lnc-CDKN2B-2:2	CDKN2B	-2.82367	0.380048	0.616593	1.01717	4.9649	5.53741	1.55868	0	2.53492
lnc-CDKN2C-1:1	CDKN2C	1.89725	0.426859	0.66231	4.71598	9.78378	10.5211	33.5117	0	13.5196
lnc-CDR2L-2:1	CDR2L	-1.85389	0.608737	0.804972	3.51386	0.146027	3.32244	1.2989	0	2.53492
lnc-CDRT15L2-5:1	CDRT15L2	-3.75011	0.164831	0.376589	3.23645	7.7394	3.73775	1.2989	2.44947	0
lnc-CDX2-1:2	CDX2	2.65002	0.45875	0.688074	2.68163	0	0.830611	6.75429	0	2.53492
lnc-CDX2-3:1	CDX2	4.07374	0.29441	0.53459	3.97621	0	1.66122	22.8607	0	0
[truncated: 4,735 more rows]

## Sheet: 3Differential expressed lncRNAs
Sheet 3: All differential expressed lncRNAs in serum exosomes between acute minor stroke patients and healthy controls were presented.
lncRNA_ID	Gene_ID	Foldchange	PValue	FDR	H#1	H#2	H#3	P#1	P#2	P#3		H represents healthy control.
AATBC:8	RRP1	-268.621	0.000625776	0.0213875	8.13737	4.23477	1.93809	0	0	0		P represents AMS patient.
ACTN1-AS1:2	ACTN1	-126.746	0.0155367	0.110814	3.88374	1.31424	1.52279	0	0	0
ARHGEF26-AS1:4	ARHGEF26	-9.72128	0.000177753	0.0108508	50.0263	95.2093	75.4471	5.45539	9.79788	7.60476
B3GALT5-AS1:1	B3GALT5	19.1379	6.0982e-05	0.00579226	7.85996	4.9649	4.15305	204.707	18.9834	102.242
BCYRN1:2	EPCAM	-9.95903	0.00217742	0.0393045	39.4847	39.5732	42.4996	7.53364	0	4.22487
BMPR1B-AS1:2	BMPR1B	-94.7676	0.0213723	0.130284	1.20211	1.75232	2.07653	0	0	0
BOK-AS1:2	BOK	22.707	0.000898152	0.0262953	3.42139	3.65066	4.01462	148.075	0.612368	103.932
BRD2-IT1:3	BRD2	-143.399	0.012156	0.0983727	2.58916	3.79669	1.24592	0	0	0
BRE-AS1:1	BRE	10.1883	0.00658326	0.0719291	3.79127	3.79669	0	42.3442	15.9216	19.4344
CCDC18-AS1:10	CCDC18	-14.8546	0.00893045	0.0842713	7.76749	5.25695	17.5813	0	0	2.53492
CPEB1-AS1:2	CPEB1	9.47597	0.0360618	0.166532	1.01717	0.146027	1.24592	8.31298	0	15.2095
CRNDE:3	IRX5	29.6388	0.000363966	0.016529	1.10964	3.94272	0	96.8981	11.0226	42.2487
DARS-AS1:20	DARS	-108.305	0.0104568	0.0919134	1.10964	1.60629	3.04557	0	0	0
DDR1-AS1:1	DDR1	-22.3815	0.00817267	0.0814203	7.1202	11.098	7.8908	0	1.22474	0
DLEU2:1	TRIM13	12.1669	0.0114222	0.0957732	0	8.90762	1.38435	77.6744	13.4721	33.7989
DLG5-AS1:2	DLG5	15.4303	0.000109568	0.00801871	10.5416	7.1553	4.01462	202.109	37.3544	96.3269
DLGAP1-AS2:2	DLGAP1	-39.9436	8.35087e-05	0.00711726	47.0673	29.9354	32.2554	0	0	3.37989
ELOVL2-AS1:5	ELOVL2	10.1071	0.0110908	0.0939301	2.95904	3.21258	0	35.5899	8.57315	18.5894
FOXN3-AS1:1	FOXN3	42.3383	2.5134e-05	0.00319296	1.66446	0	1.66122	94.0405	17.7587	32.109
FRY-AS1:2	FRY	-6.38623	0.0242798	0.13749	20.6208	10.806	9.69046	1.81846	3.67421	0.844973
FZD10-AS1:1	FZD10	12.3117	0.00822166	0.0814203	10.2642	0.730133	0	64.1658	11.0226	61.683
GAS5:2	DARS2	-8.04245	0.0172113	0.115653	18.9564	12.8503	2.21496	1.81846	0.612368	1.68995
GAS5:39	DARS2	-169.392	0.0046123	0.0588156	2.68163	2.1904	4.15305	0	0	0
H1FX-AS1:1	H1FX	24.2062	0.000567796	0.0204478	1.29458	1.31424	0.830611	53.7746	4.28657	26.1942
HAR1A:1	YTHDF1	7.69032	0.00349745	0.0518686	6.28797	5.11093	3.32244	73.5179	9.18552	30.419
HAR1A:2	YTHDF1	9.36363	0.0154323	0.110498	15.35	8.03146	0	121.837	7.34841	90.4121
HHIP-AS1:2	HHIP	22.1711	0.00192367	0.037006	6.65785	0	1.24592	93.7808	10.4103	73.5127
HOXD-AS2:3	HOXD	8.29486	0.0302277	0.152949	2.95904	6.57119	1.52279	49.6181	0	42.2487
INTS6-AS1:10	INTS6	54.6507	0.00509222	0.0624205	1.57199	0	0	55.3333	8.57315	27.0391
INTS6-AS1:6	INTS6	7.44795	0.0186717	0.121937	0.739761	4.23477	5.53741	60.7886	13.4721	3.37989
ITFG1-AS1:1	ITFG1	18.7822	0.0249982	0.139563	4.25362	0.584106	0	60.2691	0	32.109
ITGA9-AS1:6	ITGA9	-6.76675	0.013395	0.10237	34.3064	17.9613	38.2081	6.49451	0	6.75978
KCNQ1OT1:2	KCNQ1	-3.74106	0.0310372	0.154795	101.44	97.5457	58.1428	35.5899	28.1689	4.22487
KIF9-AS1:9	KIF9	-363.976	0.00175595	0.0357767	7.95243	8.03146	3.46088	0	0	0
KLF3-AS1:6	KLF3	10.1465	0.0218148	0.131494	2.21928	2.92053	0.553741	50.1376	0	7.60476
LINC-PINT:18	MKLN1	8.34653	0.0269612	0.144761	4.34609	3.35861	0.553741	52.9952	0	16.0545
LINC00273:1	CTD-2144E22.5	4.25733	0.00844006	0.0815829	184593	358423	391728	495971	1.84448e+06	1.63906e+06
LINC00294:2	TCP11L1	-6.49717	0.002863	0.0459369	65.9312	48.9189	40.0078	10.1314	1.8371	11.8296
LINC00472:1	OGFRL1	17.8751	0.00126631	0.0304503	9.24701	7.44735	0	183.665	15.3092	100.552
LINC00475:1	SPTLC1	8.48436	0.0132025	0.101707	9.61689	4.81887	7.33706	83.9091	0	101.397
LINC00664:8	CTD-2561J22.3	-15.3833	0.0352858	0.164643	3.97621	3.21258	2.63027	0	0	0.844973
LINC00674:21	KPNA2	-230.254	0.0071941	0.0758026	1.10964	2.1904	8.99828	0	0	0
LINC00683:3	LINC00908	-10.5275	0.0188693	0.122123	9.8943	16.0629	21.5959	0	0	5.06984
LINC00886:1	LEKR1	33.1813	0.00781874	0.0784994	0	1.31424	0	26.4976	0	17.7444
LINC00887:2	CPN2	-9.8382	0.00204858	0.0381373	78.877	79.0003	91.6441	18.7042	0	5.91481
LINC00899:1	C22orf26	34.3534	0.00047751	0.0188016	0.462351	4.67285	0.138435	106.77	6.12368	68.4428
LINC00909:1	ZNF407	-152.343	0.0110198	0.0936185	1.20211	2.62848	4.29149	0	0	0
LINC00936:2	ATP2B1	-249.758	0.000554157	0.0203828	6.47291	3.65066	3.18401	0	0	0
LINC01089:21	TMEM120B	51.4379	0.000925813	0.0265255	0.924701	0	0.138435	39.2269	2.44947	17.7444
LINC01146:8	GPR65	-5.39194	0.0262013	0.143077	32.6419	30.6656	28.5176	0.779342	1.8371	15.2095
LINC01237:7	AC131097.4	-304.94	0.00134995	0.0311275	1.8494	3.79669	10.6595	0	0	0
LINC01276:3	FOXP4	18.9115	0.00129751	0.0308698	2.49669	2.62848	2.21496	90.6634	0.612368	48.1635
LINC01336:3	ANKRD31	-23.2375	0.0341729	0.162599	3.88374	3.65066	2.3534	0.259781	0	0
LINC01356:1	SLC16A1	-10.9511	0.0105586	0.0922059	12.1136	14.0185	22.4265	0	0	5.06984
LINC01400:1	PAX5	-24.1068	0.026175	0.143049	2.31175	3.21258	10.5211	0	0	0.844973
LINC01578:7	CHD2	33.3704	0.0127577	0.0998249	0	2.1904	0	58.4506	0	15.2095
MFI2-AS1:3	MFI2	7.76936	0.0252382	0.140205	12.2985	8.90762	2.49183	141.84	11.0226	31.264
MFI2-AS1:8	MFI2	292.97	2.5343e-07	0.000242124	0	0	0.830611	169.377	55.1131	25.3492
MIR155HG:2	MRPL39	-13.0194	0.0281928	0.147878	3.14398	1.75232	9.27515	0.779342	0	0
MIR193BHG:3	MKL2	25.9841	0.00370408	0.0526999	0	1.46027	2.3534	56.3724	0	43.0936
MIR3663HG:9	VAX1	-12.2385	0.00506105	0.0622963	11.6512	5.84106	7.75237	1.03912	0	0.844973
NOP14-AS1:11	NOP14	-51.7724	0.000748697	0.0235696	9.80183	3.65066	9.96733	0.259781	0	0
NR2F1-AS1:29	NR2F1	-129.123	0.0162423	0.113209	1.66446	1.60629	3.59931	0	0	0
NR2F1-AS1:35	NR2F1	-13.226	0.0406462	0.178636	1.38705	3.50464	3.46088	0	0	0.844973
NUTM2A-AS1:4	NUTM2A	-116.188	0.00969351	0.0882372	1.75693	2.48245	1.93809	0	0	0
NUTM2B-AS1:7	NUTM2B	22.8876	0.00259864	0.0434591	5.45574	0.292053	0	112.225	5.51131	16.0545
OR2A1-AS1:12	OR2A1	12.2421	0.00423694	0.0564882	7.67502	1.02219	3.18401	84.1689	0.612368	61.683
OR2A1-AS1:4	OR2A1	7.15518	0.0245978	0.138549	16.2747	5.40298	3.73775	91.183	0	91.2571
PCA3:1	PRUNE2	-211.686	0.00674414	0.0731212	3.51386	5.84106	1.93809	0	0	0
PCBP1-AS1:46	PCBP1	-6.80756	0.00467678	0.0590784	24.8745	55.9282	22.1496	5.71517	1.8371	7.60476
PGM5-AS1:1	PGM5	5.35877	0.0474943	0.194039	13.6856	6.27914	4.29149	100.275	0	29.5741
PPP4R1-AS1:1	PPP4R1	16.0163	0.00447565	0.0579565	6.47291	0	1.66122	108.069	7.34841	16.0545
PRKAG2-AS1:1	PRKAG2	4.08965	0.0491736	0.196958	11.1889	7.88543	5.39897	70.9201	4.28657	24.5042
PRKAG2-AS1:4	PRKAG2	58.658	0.00187501	0.0364868	1.47952	0	0	74.2972	1.22474	16.8995
PRKCQ-AS1:2	PRKCQ	11.4779	0.0434819	0.185411	3.14398	0	0	25.1987	0	11.8296
PTOV1-AS1:6	PTOV1	-354.972	0.000575475	0.0204478	2.49669	11.098	5.39897	0	0	0
PTPRD-AS2:1	PTPRD	89.0321	0.000164544	0.0106921	0.27741	0	0	13.2488	2.44947	16.8995
PTPRG-AS1:10	PTPRG	-17.1999	0.00493681	0.0615547	10.9115	5.98709	13.0129	0	1.8371	0
RABGAP1L-IT1:1	RABGAP1L	-8.35925	0.0312126	0.155325	5.73315	8.76159	16.3353	3.11737	0	0
RAET1E-AS1:1	RAET1E	12.3242	0.000336361	0.0159487	3.79127	11.9742	2.63027	148.335	22.0452	55.7682
RASAL2-AS1:1	RASAL2	28.1294	0.023133	0.135203	3.14398	0	0	65.4647	0	25.3492
RASSF8-AS1:10	RASSF8	19.4697	0.000137515	0.00935243	5.73315	6.57119	2.63027	142.879	6.12368	142.8
RBFADN:8	RP11-795F19.5	-7.66218	0.00351668	0.0519045	79.6168	44.246	53.2975	9.09232	0.612368	13.5196
RBM26-AS1:15	RBM26	-33.5749	0.0100879	0.0898441	2.03434	16.355	3.46088	0	0	0.844973
RBPMS-AS1:1	RBPMS	45.9017	0.000953142	0.0268515	8.59972	0	0	273.289	11.0226	115.761
RFX3-AS1:1	RFX3	-10.4971	0.0288559	0.149595	11.5588	2.7745	16.3353	0	0	3.37989
RNF139-AS1:5	RNF139	-206.098	0.00190202	0.0369058	3.42139	4.52682	3.04557	0	0	0
RPARP-AS1:17	RPARP	15.6185	0.0105172	0.0920109	4.71598	1.02219	0	63.906	2.44947	24.5042
RPS6KA2-AS1:2	RPS6KA2	-157.932	0.0263003	0.143501	1.29458	1.16821	5.95271	0	0	0
SATB1-AS1:3	SATB1	103.266	1.66783e-06	0.000701842	0.462351	1.31424	0	131.709	15.9216	38.8688
SFTPD-AS1:1	SFTPD	-6.24505	0.00982844	0.0885876	20.8982	30.8116	12.0439	2.85759	2.44947	5.06984
SGO1-AS1:8	SGO1	-128.361	0.0343135	0.162599	1.20211	1.75232	3.87618	0	0	0
SH3RF3-AS1:2	SH3RF3	5.88721	0.0175804	0.117102	7.1202	6.27914	3.87618	80.7917	8.57315	11.8296
SLC7A11-AS1:2	SLC7A11	-5.21784	0.0365643	0.167931	28.3883	11.8281	3.18401	4.67605	0	3.37989
SNHG20:14	SEC14L1	-10.8547	0.0307354	0.153974	5.36327	2.48245	5.53741	0	0.612368	0.844973
SNHG7:7	FAM69B	-539.963	9.21982e-05	0.00744514	19.3263	7.1553	2.3534	0	0	0
SOX21-AS1:1	SOX21	6.47611	0.0293879	0.151276	4.25362	3.79669	8.85985	55.593	0	54.0783
SOX21-AS1:3	SOX21	10.9952	0.0298247	0.152244	0.18494	0.584106	1.10748	6.75429	0	14.3645
SP2-AS1:14	SP2	-242.586	0.00118244	0.0293627	6.65785	3.35861	2.90714	0	0	0
SP2-AS1:15	SP2	-39.8022	0.00315709	0.0490348	4.34609	4.9649	8.44454	0.259781	0	0
ST20-AS1:1	ST20	-10.816	0.0074306	0.0775662	9.06207	6.42517	10.2442	1.81846	0	0
STXBP5-AS1:9	STXBP5	-384.601	0.00224799	0.039936	1.38705	4.23477	14.951	0	0	0
TBX2-AS1:6	TBX2	9.3566	0.0403856	0.178072	3.51386	0	2.07653	44.1627	0	8.44973
TESC-AS1:1	TESC	8.46591	0.0207474	0.128067	6.84279	2.04437	4.29149	84.6885	0	27.0391
TP53TG1:1	CROT	-225.326	0.0131674	0.101639	1.29458	1.46027	9.27515	0	0	0
TPT1-AS1:25	TPT1	-30.89	0.0136243	0.103769	2.86657	3.21258	7.33706	0.259781	0	0
TSC22D1-AS1:3	TSC22D1	21.067	1.2331e-06	0.000593033	10.9115	7.44735	9.82889	359.276	105.94	129.281
TTC28-AS1:1	TTC28	-11.5636	0.0132948	0.102068	13.2232	9.49172	10.1058	0	0	3.37989
TUG1:1	MORC2	10.1029	0.000734676	0.0235696	8.59972	10.3679	4.15305	154.05	40.4163	38.8688
UGDH-AS1:6	UGDH	-14.8752	0.0383909	0.173248	10.7265	4.23477	4.29149	0	0.612368	0.844973
USP3-AS1:3	USP3	329.809	0.000178886	0.0108508	0	0	0	9.3521	3.06184	5.06984
WDFY3-AS2:3	WDFY3	33.5235	0.00108266	0.0288271	1.57199	0.43808	0	58.7104	7.96078	3.37989
WDR11-AS1:6	WDR11	-11.6536	0.00421619	0.0564882	7.02773	16.355	35.301	3.63693	0	0.844973
WT1-AS:1	WT1	3.81577	0.0384187	0.173257	11.1889	12.7043	8.58298	81.0515	8.57315	33.7989
ZNF503-AS2:11	ZNF503	21.798	0.0274529	0.146135	0	4.9649	0	3.63693	11.635	93.792
ZNRF3-AS1:1	ZNRF3	-7.49682	0.00139901	0.0318228	63.2495	44.5381	43.3302	4.67605	4.89894	10.9846
lnc-A1CF-8:1	A1CF	9.34761	0.0377368	0.17133	0	0.43808	11.3517	72.219	15.9216	21.9693
lnc-A1CF-8:2	A1CF	39.3115	0.00332697	0.0506316	3.42139	0	0	90.4036	0	48.1635
lnc-AADAT-9:1	AADAT	-11.0218	0.00659145	0.0719291	7.85996	12.8503	45.6836	1.2989	0	5.06984
lnc-AAK1-5:4	AAK1	681.434	1.06762e-05	0.0021142	0	0	0	22.0813	7.34841	6.75978
lnc-ABHD12-4:2	ABHD12	-5.93099	0.0161872	0.11302	12.391	28.1831	29.3482	2.85759	7.96078	0.844973
lnc-AC004223.1-1:1	AC004223.1	-8.0648	0.00498828	0.0619669	19.5112	25.2626	25.3336	3.63693	0	5.06984
lnc-AC006435.1-2:1	AC006435.1	-256.686	0.00535942	0.0640941	1.20211	1.02219	11.4901	0	0	0
lnc-AC008073.6.1-2:2	AC008073.6.1	-5.09912	0.00689072	0.0742323	38.745	45.1222	51.7747	7.79342	7.96078	10.9846
lnc-AC009065.1-2:4	AC009065.1	-8.27871	0.0180414	0.119325	14.3329	8.17748	22.1496	0.259781	0.612368	5.06984
lnc-AC009403.2.1-2:4	AC009403.2.1	-442.927	0.00131018	0.0308796	3.23645	2.04437	18.4119	0	0	0
lnc-AC016251.1-17:1	AC016251.1	-16.4775	0.0109308	0.0930851	6.1955	2.1904	4.70679	0.519561	0	0
lnc-AC021860.1-7:1	AC021860.1	-19.6716	0.0213819	0.130284	3.79127	5.98709	2.7687	0	0	0.844973
lnc-AC022098.1-5:1	AC022098.1	-335.383	0.000355845	0.0163224	6.65785	6.13311	5.1221	0	0	0
lnc-AC040934.1-1:1	AC040934.1	1218.98	9.41619e-07	0.000576356	0	0	0	39.7464	9.18552	16.0545
lnc-AC068473.1-2:1	AC068473.1	7.87339	0.0154567	0.110498	14.7027	1.60629	7.06019	107.03	0.612368	76.8925
lnc-AC068473.1-2:10	AC068473.1	6.96479	0.0491407	0.196958	6.56538	1.02219	0	31.1737	6.12368	16.0545
lnc-AC069257.9.1-14:1	AC069257.9.1	-145.104	0.0161984	0.11302	1.10964	4.9649	1.66122	0	0	0
lnc-AC069257.9.1-8:1	AC069257.9.1	-1244.59	9.85158e-08	0.000132661	29.5904	17.0851	19.9347	0	0	0
lnc-AC073343.1-5:1	AC073343.1	-137.591	0.0136495	0.103844	2.40422	1.31424	3.59931	0	0	0
lnc-AC073416.2-10:1	AC073416.2	-9.81638	0.0494319	0.19764	3.97621	2.7745	6.78332	1.03912	0	0
lnc-AC074091.13.1-2:1	AC074091.13.1	-78.1251	0.000145492	0.00969899	28.6657	6.86325	8.58298	0	0.612368	0
lnc-AC079341.1-10:1	AC079341.1	14.9103	0.000174898	0.0108508	21.8229	8.46954	13.1513	397.984	38.5792	212.088
lnc-AC083864.4.1-3:1	AC083864.4.1	-89.7761	0.027314	0.145712	1.75693	1.75232	1.24592	0	0	0
lnc-AC091132.2-7:1	AC091132.2	8.99615	0.0303723	0.152949	1.10964	2.1904	0	23.1205	0.612368	5.91481
lnc-AC102948.1.1-4:1	AC102948.1.1	-10.569	0.000365808	0.016529	93.3948	211.3	453.79	16.626	20.8205	34.6439
lnc-AC102948.1.1-4:2	AC102948.1.1	-4.19568	0.0209597	0.128643	287.859	802.416	1172.41	91.4427	270.667	177.444
lnc-AC108938.5.1-1:10	AC108938.5.1	33.1141	0.00307022	0.0482722	0.27741	2.04437	0	54.0343	7.34841	16.0545
lnc-AC109486.1-4:1	AC109486.1	-17.5033	0.0160366	0.112356	5.82562	3.94272	3.87618	0.519561	0	0
lnc-AC130352.1-2:13	AC130352.1	-8.7759	0.0123308	0.0984856	25.6142	5.40298	2.21496	3.11737	0	0
lnc-ACOXL-4:1	ACOXL	-4.90356	0.0168434	0.114083	19.9735	37.6748	38.2081	10.1314	5.51131	3.37989
lnc-ACTG1-3:1	ACTG1	19.1807	0.00110875	0.0288794	2.21928	2.92053	2.21496	71.6994	13.4721	56.6132
lnc-ADAMTSL4-7:1	ADAMTSL4	-7.68303	0.0326788	0.15944	3.88374	7.7394	16.4738	1.55868	1.8371	0
lnc-ADAMTSL5-1:2	ADAMTSL5	11.0543	0.00113465	0.029048	11.0039	5.98709	4.70679	143.659	12.2474	84.4973
lnc-ADAT1-1:1	ADAT1	-11.3718	0.0121191	0.0983252	9.98677	13.4344	3.04557	1.81846	0	0
lnc-ADAT3-1:1	ADAT3	7.92939	0.00827852	0.0814203	5.91809	1.89834	1.38435	41.8247	17.1463	14.3645
lnc-ADD1-2:2	ADD1	12.1242	0.0230082	0.134709	0.0924701	0.146027	0.692176	1.2989	7.96078	2.53492
lnc-AGMAT-1:2	AGMAT	-132.205	0.00706905	0.0750724	1.01717	1.46027	4.56836	0	0	0
lnc-AKAP1-4:3	AKAP1	-83.7637	7.88901e-05	0.00711726	17.0145	17.3772	15.6432	0	0	0.844973
lnc-AKAP11-1:2	AKAP11	-7.51554	0.0373691	0.170349	9.8943	13.2884	3.18401	0	0.612368	3.37989
lnc-AKAP12-1:1	AKAP12	-5.26658	0.0249525	0.139423	41.1492	34.6083	16.1969	3.63693	0	14.3645
lnc-AKAP4-2:4	AKAP4	-10.8226	0.0280341	0.14781	12.2985	4.81887	7.33706	1.81846	0	0
lnc-AKAP9-1:2	AKAP9	22.7242	0.0077936	0.0784991	0.27741	0.876159	0	12.989	3.06184	10.9846
lnc-AKR1CL1-3:1	AKR1CL1	-7.62916	0.00491963	0.0614543	8.32231	35.3384	51.7747	3.89671	6.73605	1.68995
lnc-AL035696.1-8:1	AL035696.1	-280.727	0.00358668	0.0520455	5.82562	3.06656	6.09115	0	0	0
lnc-AL078585.1-10:1	AL078585.1	-12.2768	0.00655708	0.0717867	6.56538	13.4344	8.99828	1.81846	0	0
lnc-AL137798.1-2:1	AL137798.1	-72.1123	0.0358288	0.166025	1.38705	1.31424	1.10748	0	0	0
lnc-AL353597.1-1:3	AL353597.1	-290.696	0.000636485	0.0215349	10.5416	1.75232	3.18401	0	0	0
lnc-AL391421.1-3:1	AL391421.1	22.5314	0.0103151	0.0911662	1.10964	0.146027	0	4.41627	15.9216	10.1397
lnc-AL591845.1-1:1	AL591845.1	-94.8856	1.3081e-05	0.00214815	29.4055	7.30133	18.5503	0	0	0.844973
lnc-AL669831.1-11:1	AL669831.1	-18.0644	0.000334358	0.0159487	22.2853	24.2404	91.7825	2.33802	1.22474	4.22487
lnc-AL669831.1-11:2	AL669831.1	-10.9504	0.000313076	0.0153864	390.409	956.62	2202.92	109.887	67.3605	147.025
lnc-AL669831.1-12:1	AL669831.1	-8.32696	0.000870044	0.0260937	217.027	567.313	1256.58	69.3614	82.0573	93.792
lnc-ALK-1:1	ALK	-5.40009	0.0461241	0.19029	27.6486	11.244	25.8874	1.55868	0	10.9846
lnc-ALS2CR11-2:1	ALS2CR11	-6.97717	0.0356868	0.165939	6.56538	2.62848	22.4265	2.59781	0	1.68995
lnc-AMDHD1-3:1	AMDHD1	-16.9273	0.0448213	0.187559	0.27741	2.62848	19.5194	1.03912	0	0
lnc-AMIGO2-4:1	AMIGO2	-6.20503	0.0451161	0.188207	2.68163	13.1424	14.1204	3.63693	0.612368	0
lnc-ANAPC11-4:1	ANAPC11	-204.383	0.00623989	0.0694432	5.73315	3.21258	1.93809	0	0	0
lnc-ANKRD20A3-8:1	ANKRD20A3	-144.488	0.00447017	0.0579565	2.49669	4.08874	1.10748	0	0	0
lnc-ANKRD23-2:2	ANKRD23	8.16807	0.022281	0.13276	1.57199	2.62848	3.87618	52.9952	0	12.6746
lnc-ANKRD26-5:1	ANKRD26	-592.893	3.57643e-05	0.00408138	8.22984	4.52682	18.9656	0	0	0
lnc-ANKRD33B-10:1	ANKRD33B	13.6163	0.0124659	0.0988611	2.7741	0	2.07653	36.8888	18.9834	10.9846
lnc-ANKRD34B-3:1	ANKRD34B	-24.4156	0.0017596	0.0357767	22.3778	20.5897	6.78332	0	0	2.53492
lnc-ANKRD34B-4:1	ANKRD34B	-8.45132	0.0012428	0.0300999	4806.04	8975.23	21800.5	827.661	1860.99	1521.8
lnc-ANKRD42-2:1	ANKRD42	-11.6805	0.0379545	0.171782	5.91809	8.46954	1.52279	0	0	1.68995
lnc-ANO6-1:1	ANO6	29.6908	0.000453692	0.0180752	2.21928	0	0.692176	42.8638	10.4103	36.3338
lnc-ANO9-1:1	ANO9	-7.12465	0.0380822	0.172086	14.0555	9.63775	5.53741	2.85759	0	0.844973
lnc-AP3M1-4:1	AP3M1	-8.55935	0.00176413	0.0357767	49.4715	38.9891	30.0404	1.2989	5.51131	7.60476
lnc-AP3M2-2:1	AP3M2	-14.336	0.00236633	0.0413831	12.6684	12.9964	11.767	1.55868	0.612368	0
lnc-APBA2-5:5	APBA2	9.34818	0.0221347	0.132405	1.66446	0.730133	7.33706	51.4365	0	39.7137
lnc-APEX1-3:1	APEX1	-17.1964	0.0296733	0.151817	2.21928	7.1553	1.66122	0	0	0.844973
lnc-APOL6-2:1	APOL6	-231.149	0.00210562	0.0386298	4.99339	5.25695	2.07653	0	0	0
lnc-APPL2-4:1	APPL2	-225.713	0.00762205	0.0781188	1.10964	5.54901	5.39897	0	0	0
lnc-AQP2-1:4	AQP2	-15.7897	0.0342506	0.162599	10.7265	2.62848	3.04557	0.259781	0	0.844973
lnc-AQP8-2:1	AQP8	16.0019	0.00513297	0.0624935	1.75693	1.02219	2.3534	50.6572	0	32.109
lnc-ARF3-1:1	ARF3	158.956	0.000174875	0.0108508	0	0	0	1.03912	1.8371	5.91481
lnc-ARF6-3:1	ARF6	-12.1257	0.0214639	0.130299	4.90092	5.25695	25.3336	0	0	3.37989
lnc-ARHGAP17-5:1	ARHGAP17	-10.4169	0.0107745	0.0925313	19.2338	13.8725	19.9347	0.519561	0	5.06984
lnc-ARHGAP21-1:2	ARHGAP21	-6.39239	0.033573	0.161462	16.8296	18.6914	18.9656	7.01407	0	0.844973
lnc-ARHGAP35-2:1	ARHGAP35	-14.0394	0.00909812	0.0851984	13.778	5.54901	14.2588	0.779342	0	1.68995
lnc-ARHGEF35-2:1	ARHGEF35	-21.7612	0.0474125	0.193824	1.10964	1.02219	12.8745	0	0	0.844973
lnc-ARID2-11:1	ARID2	-517.504	0.000325224	0.0158212	3.79127	20.5897	3.32244	0	0	0
lnc-ARL1-4:1	ARL1	-5.53402	0.0349559	0.163899	22.2853	36.2146	9.27515	1.81846	0	10.9846
lnc-ARL13A-1:1	ARL13A	-7.50137	0.0204679	0.12799	19.0488	18.2533	7.61393	2.07824	3.67421	0
lnc-ARL3-1:1	ARL3	18.1186	8.89367e-05	0.00739273	7.85996	3.21258	3.18401	178.989	19.5958	60.8381
lnc-ARRB1-1:1	ARRB1	914.585	3.77319e-07	0.000282276	0	0	0	23.1205	17.1463	8.44973
lnc-ARVCF-1:8	ARVCF	-8.12742	0.0083803	0.0814207	20.8058	20.1517	39.1771	2.59781	0	7.60476
lnc-ASAH2-6:1	ASAH2	11.6097	0.00819488	0.0814203	5.91809	1.31424	1.66122	44.4225	0	59.9931
lnc-ASAP1-5:1	ASAP1	-205.428	0.00534437	0.0640278	2.58916	3.94272	4.42992	0	0	0
lnc-ATAD5-3:12	ATAD5	-26.337	0.0275742	0.146149	2.03434	1.31424	7.8908	0.259781	0	0
lnc-ATAD5-3:7	ATAD5	28.2509	1.19218e-05	0.00211883	13.778	15.3328	1.10748	536.187	103.49	215.468
lnc-ATG12-5:1	ATG12	-7.42776	0.0439825	0.186248	6.28797	2.48245	9.27515	0.259781	0	2.53492
lnc-ATG7-1:1	ATG7	10.9715	0.0153965	0.110399	1.75693	65.1278	2.49183	722.19	10.4103	27.8841
lnc-ATL3-2:1	ATL3	-9.6058	0.0309632	0.154668	2.95904	8.17748	4.29149	0.259781	0.612368	0.844973
lnc-ATP1B3-2:1	ATP1B3	-131.884	0.0150205	0.109192	3.88374	1.31424	1.79966	0	0	0
lnc-ATP2B2-1:3	ATP2B2	-170.489	0.010509	0.0920109	1.10964	4.52682	3.46088	0	0	0
lnc-ATP6AP2-2:4	ATP6AP2	-34.609	0.00617468	0.0690577	9.06207	8.90762	4.01462	0	0	0.844973
lnc-ATP6V1E1-4:1	ATP6V1E1	-100.009	0.0236522	0.136844	2.58916	1.46027	1.24592	0	0	0
lnc-ATXN2L-1:1	ATXN2L	-18.3266	0.014125	0.105369	13.3157	3.21258	8.30611	0	0	1.68995
lnc-AUH-6:1	AUH	-272.256	0.00169313	0.0350356	8.87713	1.75232	3.87618	0	0	0
lnc-AZIN1-1:4	AZIN1	-6.78934	0.00255954	0.0432135	45.3103	25.7007	34.055	4.41627	3.67421	7.60476
lnc-AZIN1-2:1	AZIN1	-15.4875	8.33623e-05	0.00711726	60.1056	57.0964	47.4832	4.15649	0.612368	5.91481
lnc-B2M-1:2	B2M	-14.772	0.0213757	0.130284	7.02773	6.71722	6.22958	0	0	1.68995
lnc-B3GNTL1-3:1	B3GNTL1	-29.2149	0.000748445	0.0235696	20.1585	2.7745	10.5211	0.779342	0	0
lnc-B9D2-1:3	B9D2	-9.8897	0.0170786	0.115336	5.2708	7.00927	7.8908	0.519561	0	1.68995
lnc-BACE1-1:1	BACE1	-1043.05	1.40159e-06	0.000629129	16.4597	14.6027	24.7799	0	0	0
lnc-BACE1-2:1	BACE1	-8.34432	0.00945145	0.0870299	31.7172	12.4123	25.0568	2.59781	0	5.91481
lnc-BARX2-1:1	BARX2	-5.38072	0.00638286	0.07028	60.198	74.0354	88.8754	7.53364	6.73605	27.8841
lnc-BBIP1-4:1	BBIP1	-9.60206	0.0347127	0.163213	7.30514	7.59338	5.26053	0	0	2.53492
lnc-BCL11A-9:1	BCL11A	-11.1636	0.0051194	0.0624438	6.93526	29.6434	44.2992	5.19561	0.612368	0.844973
lnc-BCL2L11-6:1	BCL2L11	-149.427	0.0255152	0.140815	2.40422	2.92053	2.63027	0	0	0
lnc-BCL7A-3:1	BCL7A	-6.44196	0.00569733	0.0662523	34.7688	20.4437	28.7945	4.93583	0.612368	7.60476
lnc-BCL7C-1:2	BCL7C	21.8953	0.000958002	0.0268759	11.2814	0.43808	0.138435	183.665	17.7587	60.8381
lnc-BCL9L-1:1	BCL9L	-6.5735	0.0222035	0.132414	18.5865	12.2662	12.5976	1.81846	0	5.06984
lnc-BEND3-3:5	BEND3	-7.2676	0.0116208	0.0961282	27.741	19.2755	20.2115	2.07824	0	7.60476
lnc-BHMT2-4:1	BHMT2	31.113	2.36087e-05	0.00318544	8.41478	2.1904	0.553741	244.194	28.7813	77.7375
lnc-BLACE-2:2	BLACE	12.3795	0.0242712	0.13749	5.17833	0.876159	0	44.4225	10.4103	21.1243
lnc-BMS1-10:2	BMS1	-3.53098	0.019065	0.122182	163.672	273.508	321.723	79.4928	48.3771	87.0322
lnc-BPHL-4:2	BPHL	-10.4527	0.00151365	0.0331175	27.1862	35.4844	21.8728	4.15649	1.8371	1.68995
lnc-BRI3-1:5	BRI3	-140.893	0.0234431	0.136075	3.51386	1.89834	2.07653	0	0	0
lnc-BRI3-2:1	BRI3	-5.56228	0.0450632	0.188103	10.819	10.5139	17.166	5.45539	0	0.844973
lnc-BRS3-1:1	BRS3	-4.65234	0.0453496	0.188642	12.2985	16.9391	25.7489	6.49451	0	5.06984
lnc-BTBD19-2:2	BTBD19	-10.6918	0.0349061	0.163893	13.8705	8.32351	0	0.519561	0	1.68995
lnc-BTG3-9:1	BTG3	-10.6222	0.000844595	0.0255007	24.3196	50.2331	83.0611	3.63693	3.06184	8.44973
lnc-C10orf90-2:2	C10orf90	8.03145	0.00201094	0.0377149	11.7437	8.17748	4.42992	131.709	25.7194	38.0238
lnc-C11orf63-6:1	C11orf63	-16.1018	0.00381848	0.0535621	20.251	11.098	6.36802	1.81846	0	0
lnc-C12orf35-1:4	C12orf35	24.9371	0.0041423	0.0560398	2.58916	0	0.27687	63.1267	1.22474	9.2947
lnc-C12orf68-3:1	C12orf68	-451.774	0.000436124	0.0177424	3.97621	15.7709	4.42992	0	0	0
lnc-C14orf126-12:1	C14orf126	-4.81584	0.0113325	0.0952579	214.808	606.01	1150.12	62.8669	197.182	149.56
lnc-C14orf135-3:1	C14orf135	-313.627	0.00510286	0.0624205	1.01717	2.04437	13.7051	0	0	0
lnc-C14orf180-2:2	C14orf180	6.83314	0.0373591	0.170349	2.95904	1.75232	7.33706	56.8919	0	25.3492
lnc-C14orf183-1:6	C14orf183	-13.2985	0.00241284	0.0419785	22.4702	16.0629	5.67584	0.519561	0.612368	2.53492
lnc-C14orf57-1:1	C14orf57	-34.4343	0.00584833	0.0673108	4.43856	8.17748	2.63027	0.259781	0	0
lnc-C14orf57-2:1	C14orf57	-13.141	0.00158658	0.0335925	18.5865	56.0742	80.7077	6.49451	0	5.06984
lnc-C14orf93-2:2	C14orf93	7.16946	0.00894642	0.0842713	7.49008	5.40298	13.2898	127.812	3.06184	56.6132
lnc-C15orf2-6:1	C15orf2	-327.876	0.00109994	0.0288794	6.1955	10.0758	1.24592	0	0	0
lnc-C15orf29-1:3	C15orf29	16.5998	0.0039887	0.0549201	10.2642	2.04437	1.38435	157.947	20.8205	49.8534
lnc-C16orf42-2:1	C16orf42	4.62305	0.0265045	0.143713	15.535	5.25695	9.55202	89.1047	7.96078	43.0936
lnc-C17orf108-2:1	C17orf108	12.9812	0.00106532	0.0286913	5.82562	4.81887	4.84523	171.715	5.51131	23.6592
lnc-C19orf12-10:1	C19orf12	15.9796	0.0455368	0.189129	0	0	0.830611	5.71517	5.51131	2.53492
lnc-C1orf132-1:4	C1orf132	21.5418	0.00137036	0.0314288	0.924701	1.75232	0	32.9921	20.2081	5.06984
lnc-C1orf201-5:1	C1orf201	28.45	4.04884e-05	0.00446899	6.65785	1.02219	2.63027	194.835	22.6576	78.5825
lnc-C1orf222-1:5	C1orf222	-21.8013	0.00216155	0.0391995	10.4491	16.793	31.7016	0	0.612368	2.53492
lnc-C20orf96-3:1	C20orf96	5.60491	0.0282623	0.14797	3.23645	4.23477	0.830611	27.7965	4.28657	14.3645
lnc-C21orf58-1:2	C21orf58	-15.5176	0.0309657	0.154668	3.23645	4.08874	2.49183	0	0	0.844973
lnc-C21orf67-11:1	C21orf67	10.6262	0.0487634	0.196014	1.10964	1.31424	0	11.1706	0	15.2095
lnc-C22orf32-2:1	C22orf32	-18.4313	0.0124971	0.098992	5.2708	2.33642	3.59931	0	0	0.844973
lnc-C22orf34-7:1	C22orf34	-11.3778	0.0163458	0.113462	7.58255	6.42517	5.53741	0.779342	0	0.844973
lnc-C2orf57-2:1	C2orf57	-13.4289	0.000327425	0.0158212	150.726	129.526	54.9587	7.01407	0.612368	17.7444
lnc-C2orf65-5:1	C2orf65	-114.175	0.0153259	0.110113	1.75693	3.06656	1.24592	0	0	0
lnc-C2orf82-2:2	C2orf82	5.58929	0.00894905	0.0842713	7.67502	16.501	13.8435	137.164	12.2474	62.528
lnc-C3orf38-3:1	C3orf38	-29.597	0.0020994	0.038621	9.33948	13.5805	15.7816	0	0	1.68995
lnc-C3orf72-7:1	C3orf72	6.64761	0.0433338	0.185014	1.10964	0.730133	0.692176	7.53364	1.22474	8.44973
lnc-C3orf72-7:2	C3orf72	-12.6037	0.00405675	0.0555466	42.2588	35.9225	22.7034	0.259781	0	8.44973
lnc-C3orf79-9:1	C3orf79	-3.42794	0.0361137	0.166658	28.7582	63.0834	76.8315	10.651	17.7587	21.1243
lnc-C5orf17-10:1	C5orf17	-6.19532	0.0238209	0.137082	16.7371	26.2848	15.7816	0.779342	7.96078	0.844973
lnc-C5orf39-6:1	C5orf39	-9.30834	0.0189508	0.122123	20.066	21.1738	23.6724	0	0	7.60476
lnc-C6orf100-3:1	C6orf100	-20.4022	0.0012949	0.0308698	14.0555	11.8281	9.41359	0.779342	0	0.844973
lnc-C6orf120-3:1	C6orf120	-264.085	0.0010513	0.0284593	6.38044	4.3808	3.32244	0	0	0
lnc-C6orf120-5:1	C6orf120	-16.0208	0.0242477	0.13749	2.21928	3.65066	1.24592	0.259781	0	0
lnc-C6orf146-3:3	C6orf146	-3.89878	0.0334581	0.161024	76.3803	76.5179	39.3156	7.01407	6.73605	36.3338
lnc-C6orf195-4:2	C6orf195	-16.5269	0.0289158	0.149762	3.88374	2.04437	4.56836	0	0	0.844973
lnc-C6orf201-11:1	C6orf201	-8.98975	0.0204819	0.12799	10.7265	10.5139	5.39897	1.81846	0	0.844973
lnc-C6orf201-15:1	C6orf201	-158.524	0.00299771	0.0474909	3.42139	3.21258	1.79966	0	0	0
lnc-C6orf201-20:2	C6orf201	-37.7196	0.011597	0.0961282	3.6988	5.54901	15.7816	0	0	0.844973
lnc-C6orf201-4:1	C6orf201	7.98313	0.0189959	0.122123	19.4187	9.3457	2.7687	149.114	0	103.087
lnc-C6orf201-9:1	C6orf201	-23.9489	0.0328008	0.159606	2.03434	5.40298	2.7687	0.259781	0	0
lnc-C6orf221-2:2	C6orf221	-4.22787	0.0268392	0.144407	39.8546	40.0113	46.9295	1.55868	12.2474	16.8995
lnc-C6orf223-3:2	C6orf223	8.18605	0.00613869	0.0690577	7.49008	1.89834	5.39897	69.6212	3.67421	48.1635
lnc-C6orf70-2:2	C6orf70	24.2556	0.00413156	0.0560398	0.832231	0	1.10748	30.6541	0	17.7444
lnc-C7orf55-1:2	C7orf55	-113.299	0.0187738	0.122012	1.47952	2.1904	2.3534	0	0	0
lnc-C8orf83-8:1	C8orf83	9.29822	0.00427038	0.0564882	8.13737	1.02219	12.736	138.463	8.57315	56.6132
lnc-C8orf84-3:1	C8orf84	-36.7782	8.75151e-05	0.00736549	14.1479	19.1295	44.1608	1.55868	0	0
lnc-C9orf102-11:1	C9orf102	10.0375	0.00782312	0.0784994	11.3738	10.0758	10.7979	161.064	0	163.08
lnc-C9orf129-1:2	C9orf129	-136.585	0.00946173	0.0870299	1.10964	4.23477	1.93809	0	0	0
lnc-C9orf150-1:1	C9orf150	-11.5834	0.0019695	0.0373539	21.8229	18.2533	48.7292	2.07824	0	5.91481
lnc-C9orf171-4:1	C9orf171	6.69673	0.0344486	0.162653	6.28797	0.146027	2.3534	33.5117	14.6968	10.9846
lnc-C9orf47-2:1	C9orf47	-61.6379	0.000395352	0.0170528	4.34609	6.27914	38.485	0.519561	0	0
lnc-C9orf92-3:1	C9orf92	-25.9992	0.00157072	0.0335194	26.169	21.3199	26.5795	0	0	3.37989
lnc-CAB39L-4:2	CAB39L	38.6193	1.25631e-05	0.00214562	1.10964	2.1904	2.49183	165.22	39.1915	19.4344
lnc-CACYBP-2:1	CACYBP	-423.969	0.000582218	0.0204478	4.71598	1.89834	16.0585	0	0	0
lnc-CALCR-1:1	CALCR	-108.05	0.0239549	0.137479	2.86657	1.75232	1.10748	0	0	0
lnc-CALCRL-1:1	CALCRL	-171.797	0.010613	0.0922997	2.40422	2.04437	4.70679	0	0	0
lnc-CALM1-7:1	CALM1	-161.868	0.0138916	0.104262	2.03434	1.60629	4.98366	0	0	0
lnc-CAMKMT-1:1	CAMKMT	-163.287	0.0118142	0.096888	1.20211	5.98709	1.52279	0	0	0
lnc-CAMSAP2-1:1	CAMSAP2	-17.6916	0.0482072	0.19506	5.08586	5.40298	1.38435	0	0	0.844973
lnc-CAMSAP2-5:1	CAMSAP2	-11.7037	0.000704115	0.0231412	44.1082	29.3513	26.3027	0.519561	4.28657	4.22487
lnc-CANX-1:2	CANX	10.0074	0.0152974	0.11004	4.80845	1.46027	4.84523	65.2049	0	46.4735
lnc-CAPN2-2:2	CAPN2	-8.51291	0.0312546	0.155419	2.86657	17.5232	14.1204	0.259781	3.06184	0.844973
lnc-CASP9-1:1	CASP9	-14.204	0.0157453	0.11171	7.85996	13.2884	3.18401	0.779342	0	0.844973
lnc-CAV2-2:1	CAV2	-52.2708	0.000582211	0.0204478	12.2985	6.27914	13.0129	0	0	0.844973
lnc-CCDC111-1:1	CCDC111	-9.58341	0.0428799	0.183775	8.0449	1.60629	3.04557	0	0	1.68995
lnc-CCDC157-3:1	CCDC157	-7.75049	0.0359919	0.166532	5.45574	8.61556	6.50645	1.55868	0	0.844973
lnc-CCDC51-3:1	CCDC51	43.5978	0.000292864	0.0149665	0	2.04437	0.969046	86.2471	1.22474	43.9386
lnc-CCDC56-1:1	CCDC56	-7.28009	0.0225759	0.133415	8.78466	9.78378	16.3353	1.55868	0	3.37989
lnc-CCDC85C-4:1	CCDC85C	-91.7257	0.0137473	0.104262	1.47952	1.16821	2.21496	0	0	0
lnc-CCDC87-1:1	CCDC87	-5.2498	0.044303	0.18696	13.1308	8.61556	5.26053	3.11737	0	1.68995
lnc-CCDC93-4:4	CCDC93	-5.839	0.0406098	0.178631	5.64068	18.1073	25.1952	1.55868	6.73605	0
lnc-CCL18-3:1	CCL18	-178.312	0.00283534	0.0459369	1.75693	5.54901	2.21496	0	0	0
lnc-CCL25-1:1	CCL25	-15.3845	0.000293418	0.0149665	65.0065	42.7858	77.6621	5.97495	0	5.91481
lnc-CCL4-2:1	CCL4	-12.3805	0.0229844	0.134709	5.45574	7.44735	3.46088	0	0	1.68995
lnc-CCL5-2:1	CCL5	3.60207	0.0168374	0.114083	198.811	248.391	280.885	451.758	1043.47	1128.04
lnc-CCNH-3:1	CCNH	-120.559	0.00652595	0.0716063	1.47952	1.75232	3.18401	0	0	0
lnc-CD47-4:1	CD47	-29.2717	0.00355908	0.0520455	2.21928	23.6563	4.15305	0.259781	0	0.844973
lnc-CDC27-7:1	CDC27	-7.77968	0.0436705	0.185946	37.8203	10.6599	19.2425	3.63693	0	5.06984
lnc-CDC42BPA-2:1	CDC42BPA	-8.27665	0.0085807	0.0826521	64.8215	89.8063	90.675	0	9.18552	21.1243
lnc-CDCA7L-2:1	CDCA7L	30.0583	0.000304896	0.0153199	1.38705	3.50464	0	111.186	11.0226	25.3492
lnc-CDH11-5:1	CDH11	-5.39346	0.0296734	0.151817	132.88	23.6563	42.4996	27.7965	0	8.44973
lnc-CDH5-9:1	CDH5	-628.9	1.37577e-05	0.00220549	20.8058	9.05364	3.73775	0	0	0
lnc-CDH6-15:1	CDH6	-11.4202	0.00934876	0.0867906	9.61689	6.86325	14.951	0.519561	0	2.53492
lnc-CDK12-1:3	CDK12	-12.6175	0.00915186	0.0855826	13.1308	5.11093	15.3663	1.55868	0	0.844973
lnc-CDYL2-1:1	CDYL2	-135.503	0.0215197	0.130299	3.05151	2.62848	1.52279	0	0	0
lnc-CECR1-3:1	CECR1	-7.95805	0.0481798	0.19506	1.10964	7.44735	16.4738	0.779342	0	2.53492
lnc-CELA2B-3:1	CELA2B	-54.6668	0.000530345	0.0197282	11.4663	8.90762	4.42992	0.259781	0	0
lnc-CENPO-2:2	CENPO	-170.498	0.00353127	0.0519127	2.58916	2.48245	4.01462	0	0	0
lnc-CENPP-1:2	CENPP	-398.166	0.00111949	0.0288794	5.82562	7.1553	8.30611	0	0	0
lnc-CENPP-15:1	CENPP	-13.5399	0.0252729	0.140283	4.25362	4.3808	5.26053	0.259781	0	0.844973
lnc-CENPP-7:1	CENPP	-261.026	0.00335794	0.0507092	5.64068	4.9649	3.32244	0	0	0
lnc-CEP95-3:1	CEP95	-7.10933	0.0106428	0.0922997	48.1769	21.904	21.1806	9.61188	0	2.53492
lnc-CERK-2:1	CERK	-12.6931	0.0260393	0.142423	3.23645	5.54901	5.1221	0.779342	0	0
lnc-CES5A-1:1	CES5A	-13.3245	0.0418523	0.1811	14.9802	8.32351	6.22958	0	0	2.53492
lnc-CGREF1-2:1	CGREF1	-4.9048	0.0381369	0.172217	21.3606	91.9967	95.7971	0.519561	16.5339	26.1942
lnc-CHAF1B-6:1	CHAF1B	-175.136	0.00545864	0.0647061	4.90092	2.33642	2.07653	0	0	0
lnc-CHCHD7-5:2	CHCHD7	-5.60262	0.0475715	0.194039	9.8943	3.50464	29.2098	5.19561	1.8371	0
lnc-CHMP2B-1:1	CHMP2B	-5.58191	0.00317299	0.0490348	68.058	126.313	132.344	26.4976	9.79788	21.9693
lnc-CHRM3-1:2	CHRM3	40.6628	0.000632097	0.0214945	0.832231	0	1.10748	41.0453	2.44947	38.0238
lnc-CHST10-3:1	CHST10	-92.7136	0.0264038	0.143706	1.94187	1.16821	1.79966	0	0	0
lnc-CHST12-1:6	CHST12	-572.089	0.00157815	0.0335194	12.5759	3.06656	14.951	0	0	0
lnc-CHST12-4:2	CHST12	-7.42298	0.00582188	0.0673108	94.9668	59.8709	28.1023	2.85759	3.06184	19.4344
lnc-CIDEA-2:3	CIDEA	-171.568	0.00405896	0.0555466	3.23645	4.3808	1.52279	0	0	0
lnc-CLC-1:1	CLC	-10.0929	0.0498921	0.198536	9.80183	3.06656	0.830611	0	0	1.68995
lnc-CLDN15-1:1	CLDN15	-113.537	0.00845758	0.0815829	1.38705	1.60629	3.04557	0	0	0
lnc-CLEC18B-2:5	CLEC18B	-429.173	0.000744946	0.0235696	4.99339	1.89834	16.0585	0	0	0
lnc-CLSPN-1:2	CLSPN	-463.221	0.000397637	0.0170528	5.45574	12.2662	7.06019	0	0	0
lnc-CLVS1-1:7	CLVS1	5.78784	0.0132399	0.101805	8.50725	1.02219	7.19863	55.3333	12.8597	28.7291
lnc-CMC1-8:1	CMC1	-41.1255	0.00426619	0.0564882	8.87713	8.17748	1.10748	0.259781	0	0
lnc-CMTM3-3:1	CMTM3	7.67335	0.0121182	0.0983252	3.51386	2.48245	2.07653	43.9029	6.12368	11.8296
lnc-CMTM7-1:1	CMTM7	-238.987	0.004264	0.0564882	5.08586	6.27914	1.38435	0	0	0
lnc-CNNM4-2:1	CNNM4	-32.5544	1.55591e-05	0.00227738	37.0805	34.7543	17.7197	1.55868	0	0.844973
lnc-CNOT6-5:2	CNOT6	9.09006	0.0420596	0.181647	0.832231	2.62848	0.415305	23.8998	1.22474	10.1397
lnc-CNTFR-2:1	CNTFR	17.2234	0.0281655	0.147878	0.832231	3.06656	0	38.9671	0	28.7291
lnc-CNTLN-5:1	CNTLN	435.323	6.46643e-06	0.00161254	0	0	0	5.45539	1.22474	16.8995
lnc-COG2-4:3	COG2	-10.9636	0.0227196	0.133927	9.8943	8.61556	17.166	0.259781	0	3.37989
lnc-COIL-1:1	COIL	-12.4939	0.00289739	0.0463375	22.7476	14.7487	10.3826	3.11737	0	0
lnc-COL24A1-1:1	COL24A1	-22.646	0.0496976	0.198324	2.12681	3.79669	9.82889	0	0	0.844973
lnc-COL4A5-3:1	COL4A5	6.67307	0.0015414	0.0331573	842.403	1522.47	1660.39	2718.08	7164.09	16979.7
lnc-COX4I2-1:1	COX4I2	-31.0248	0.00365224	0.0523329	6.93526	8.32351	3.73775	0	0	0.844973
lnc-COX7B-4:2	COX7B	-12.8514	0.00763437	0.0781188	12.6684	10.3679	7.75237	0.259781	0	2.53492
lnc-CPD-1:1	CPD	-13.9992	0.0413606	0.17979	6.56538	4.81887	19.7962	0	0	2.53492
lnc-CPNE5-1:1	CPNE5	7.34352	0.0075075	0.07766	9.15454	3.21258	20.9037	161.583	7.34841	75.2026
lnc-CPT2-3:2	CPT2	-173.444	0.0023031	0.0407001	4.53103	2.33642	2.3534	0	0	0
lnc-CRABP2-2:2	CRABP2	-1370.53	1.34458e-07	0.000150884	29.6829	33.5861	10.1058	0	0	0
lnc-CREB1-5:1	CREB1	-22.2739	3.68358e-05	0.00413359	58.1637	55.198	47.6217	3.63693	0	3.37989
lnc-CRELD1-3:1	CRELD1	-17.5559	0.0103569	0.0913934	5.08586	11.244	6.92176	0	0	1.68995
lnc-CRHR2-3:1	CRHR2	-17.8445	0.0164605	0.113777	9.43195	3.94272	4.98366	0.259781	0	0.844973
lnc-CRIPT-4:1	CRIPT	32.3347	1.16869e-05	0.00211883	7.21267	1.75232	0.830611	217.177	37.3544	65.9079
lnc-CRISPLD2-1:2	CRISPLD2	-18.2736	0.0305344	0.153444	4.71598	1.16821	5.95271	0	0	0.844973
lnc-CRKL-2:1	CRKL	40.7705	9.63118e-08	0.000132661	4.62351	9.3457	9.41359	110.147	317.206	527.263
lnc-CROT-1:1	CROT	10.7307	0.018421	0.120885	1.94187	2.62848	1.52279	39.4866	0	26.1942
lnc-CRTC1-1:1	CRTC1	-118.633	0.0178289	0.118365	3.32892	1.02219	1.93809	0	0	0
lnc-CRYBB2-3:1	CRYBB2	-6.11992	0.00144683	0.0325804	182.074	257.299	433.302	63.1267	50.2142	28.7291
lnc-CSE1L-4:1	CSE1L	-5.55162	0.0149845	0.109187	105.139	72.5752	30.4557	31.4334	2.44947	2.53492
lnc-CSNK1G2-1:3	CSNK1G2	31.9231	0.0107371	0.0924461	0	1.60629	0	37.4084	13.4721	0.844973
lnc-CSPP1-1:1	CSPP1	54.0321	0.00565626	0.0658885	1.10964	0	0	47.7996	0	16.8995
lnc-CTD-2144E22.5.1-25:1	CTD-2144E22.5.1	-177	0.0153402	0.110113	3.42139	1.02219	4.98366	0	0	0
lnc-CTD-2210P24.4.1-1:5	CTD-2210P24.4.1	-9.61545	0.0388233	0.174149	4.16115	4.08874	2.3534	0.779342	0	0
lnc-CTD-2368P22.1.1-2:1	CTD-2368P22.1.1	-9.88679	0.0228872	0.134675	15.0726	8.90762	4.29149	0	0	3.37989
lnc-CTNNA3-4:1	CTNNA3	-8.96385	0.0290317	0.150015	2.95904	7.30133	12.8745	2.07824	0	0
lnc-CTSZ-7:1	CTSZ	-8.2598	0.0411102	0.17962	6.93526	32.856	5.95271	0.259781	0.612368	5.06984
lnc-CUL4A-2:1	CUL4A	-15.7677	0.0307852	0.154109	4.25362	1.02219	4.70679	0	0	0.844973
lnc-CXADR-4:1	CXADR	5.36385	0.0175397	0.117102	14.2404	10.5139	3.04557	71.9592	7.34841	70.1328
lnc-CXADR-4:2	CXADR	-23.7669	0.00191355	0.0369168	24.1347	14.6027	9.69046	0	0	2.53492
lnc-CXXC11-1:2	CXXC11	18.1262	0.00825299	0.0814203	8.22984	0	1.10748	121.058	0	49.8534
lnc-CXorf22-2:1	CXorf22	-15.8832	1.18429e-05	0.00211883	129.181	95.7934	64.5108	8.31298	3.67421	5.91481
lnc-CXorf28-3:1	CXorf28	-4.65328	0.0358271	0.166025	40.5944	24.9705	22.9802	8.83254	0	10.1397
lnc-CXorf28-8:1	CXorf28	-6.4598	0.0331146	0.160288	3.05151	7.7394	10.5211	1.03912	0.612368	1.68995
lnc-CXorf64-3:1	CXorf64	-9.33376	0.00151701	0.0331175	75.5481	157.125	466.803	47.0203	12.8597	14.3645
lnc-CXorf64-4:1	CXorf64	-4.34905	0.0116356	0.0961282	110.964	252.918	287.945	20.7824	70.4223	59.1481
lnc-CXorf64-4:2	CXorf64	-7.5235	0.00214258	0.0389892	6285.93	10998.3	29326.9	1124.33	2680.95	2390.43
lnc-CXorf66-2:1	CXorf66	-135.922	0.0165996	0.113777	1.75693	4.23477	1.24592	0	0	0
lnc-CXorf69-3:1	CXorf69	-140.707	0.00638815	0.07028	3.05151	2.62848	1.79966	0	0	0
lnc-CYB561D2-2:1	CYB561D2	-7.79477	0.0398836	0.176668	9.61689	5.25695	11.6286	2.85759	0	0
lnc-CYP2W1-1:1	CYP2W1	12.6084	0.019004	0.122123	6.47291	0.146027	0	64.1658	4.28657	16.0545
lnc-DAP-14:1	DAP	1807.88	6.94408e-09	2.33773e-05	0	0	0	68.0625	7.96078	20.2794
lnc-DAZ3-1:1	DAZ3	-5.70927	0.0181096	0.119541	22.4702	17.5232	10.1058	5.19561	0.612368	2.53492
lnc-DCAF13-1:1	DCAF13	-30.9961	0.0143621	0.106733	3.51386	4.3808	5.53741	0.259781	0	0
lnc-DCAF5-2:1	DCAF5	20.6394	0.00344523	0.0515483	2.40422	0.876159	0.27687	49.3583	6.12368	19.4344
lnc-DDX18-9:1	DDX18	-5.21721	0.0254853	0.140765	1515.86	7844.4	12154.3	259.781	1914.26	1950.2
lnc-DDX20-3:1	DDX20	6.52988	0.032372	0.158639	9.61689	4.23477	3.87618	82.87	0	32.9539
lnc-DDX39A-1:1	DDX39A	-12.8537	0.0124123	0.0987355	15.535	6.13311	4.70679	0	0	2.53492
lnc-DGAT2-4:1	DGAT2	-39.9832	0.00115582	0.0292561	4.90092	17.5232	30.3173	0	0	1.68995
lnc-DGCR2-5:1	DGCR2	-4.2358	0.0495151	0.197855	28.5733	16.0629	22.5649	8.83254	0	6.75978
lnc-DGCR6-1:1	DGCR6	-17.8448	0.0037257	0.0526999	11.9286	7.30133	6.64489	1.03912	0	0
lnc-DHX30-1:1	DHX30	7.42721	0.0480726	0.19506	3.6988	6.86325	0.692176	57.4115	0	26.1942
lnc-DKK4-4:1	DKK4	50.574	1.19583e-05	0.00211883	2.31175	2.48245	0	166.26	22.6576	56.6132
lnc-DLGAP2-2:1	DLGAP2	16.3578	0.00750191	0.07766	6.56538	0	4.56836	148.594	0.612368	33.7989
lnc-DLX5-1:1	DLX5	9.52804	0.00120948	0.0296125	11.8362	11.098	3.87618	156.128	11.635	87.8772
lnc-DMC1-3:3	DMC1	11.8621	0.00220957	0.0396721	1.57199	0.43808	0.692176	11.6901	7.96078	13.5196
lnc-DMGDH-1:3	DMGDH	15.5765	0.0337413	0.161718	2.12681	0	0	20.2629	4.89894	9.2947
lnc-DNAAF1-1:1	DNAAF1	-630.187	9.01813e-05	0.00740476	7.58255	2.1904	23.9493	0	0	0
lnc-DNAH12-1:1	DNAH12	-24.4435	0.00812464	0.081162	17.8467	9.9298	0.830611	0	1.22474	0
lnc-DNAH5-5:1	DNAH5	15.9685	0.00437987	0.0574848	3.60633	0	1.93809	48.579	2.44947	38.8688
lnc-DNAJB5-5:2	DNAJB5	-547.267	2.99737e-05	0.0036038	12.391	10.2219	6.64489	0	0	0
lnc-DNAJC8-1:2	DNAJC8	-15.2539	0.0493316	0.197356	1.38705	4.23477	4.42992	0	0	0.844973
lnc-DNMT1-2:1	DNMT1	-170.774	0.0097727	0.0884638	3.60633	4.3808	1.10748	0	0	0
lnc-DOLK-2:1	DOLK	965.935	1.00899e-05	0.00205865	0	0	0	40.266	4.28657	6.75978
lnc-DRG1-3:2	DRG1	-5.02491	0.0149802	0.109187	42.2588	27.0149	41.2537	8.0532	0.612368	13.5196
lnc-DUSP1-4:2	DUSP1	-266.485	0.00133459	0.0311221	1.10964	7.88543	5.26053	0	0	0
lnc-DYNLT3-1:1	DYNLT3	5.08483	0.0237796	0.136962	9.8943	10.5139	11.9054	101.055	3.06184	59.9931
lnc-ECI2-10:1	ECI2	-244.597	0.00157612	0.0335194	3.6988	7.00927	2.3534	0	0	0
lnc-EEF1B2-2:4	EEF1B2	19.8877	0.0244229	0.138068	0	1.02219	1.93809	46.5007	0	12.6746
lnc-EFCAB2-7:1	EFCAB2	-3.61599	0.0323969	0.158639	31.9947	16.2089	18.8272	5.71517	6.12368	6.75978
lnc-EFEMP1-3:3	EFEMP1	-10.1835	9.28846e-05	0.00744514	108.098	192.463	183.565	20.0031	10.4103	16.8995
lnc-EGR2-5:1	EGR2	-15.1131	0.00119319	0.0293627	20.8982	21.1738	15.0894	0.779342	0	3.37989
lnc-EIF2AK4-6:1	EIF2AK4	-69.245	0.000290475	0.0149665	24.8745	64.2517	2.49183	0	0	1.68995
lnc-EIF2C2-5:3	EIF2C2	-14.0074	0.00317299	0.0490348	8.69219	15.1868	9.55202	1.2989	0	0.844973
lnc-EIF2C3-3:1	EIF2C3	-8.31207	0.0122111	0.0984833	22.2853	17.5232	4.01462	2.59781	0	2.53492
lnc-EIF3A-1:1	EIF3A	281.592	2.87686e-07	0.000242124	0.0924701	0.146027	0	48.579	4.89894	28.7291
lnc-EIF4E3-2:2	EIF4E3	-13.1487	0.0270999	0.145274	7.30514	5.11093	14.1204	1.03912	0	0.844973
lnc-EIF4E3-3:2	EIF4E3	7.33061	0.0364342	0.167467	3.6988	1.60629	1.24592	32.2128	0	16.0545
lnc-EIF4EBP3-1:1	EIF4EBP3	-7.67186	0.0103176	0.0911662	13.6856	27.453	40.1462	0.519561	8.57315	1.68995
lnc-EIF5B-4:1	EIF5B	-8.4065	0.027228	0.145564	7.30514	8.32351	4.42992	0.779342	0	1.68995
lnc-ELP4-3:2	ELP4	12.9776	0.0043641	0.0574526	5.91809	5.69503	1.66122	93.521	0	79.4275
lnc-EMX2-2:6	EMX2	-292.614	0.00110018	0.0288794	8.87713	1.46027	5.26053	0	0	0
lnc-ENOSF1-3:1	ENOSF1	-160.326	0.00358224	0.0520455	3.79127	3.21258	1.52279	0	0	0
lnc-ENPP1-2:1	ENPP1	24.511	0.00250099	0.0428147	1.8494	0	0.830611	29.3552	0.612368	38.0238
lnc-ENTPD5-5:1	ENTPD5	18.2332	0.000356363	0.0163224	6.1955	2.7745	5.1221	204.447	4.89894	48.1635
lnc-EPB41-1:1	EPB41	-8.8823	0.00750879	0.07766	31.5323	14.7487	13.5666	3.89671	0	2.53492
lnc-EPC1-3:2	EPC1	-19.8649	0.000165153	0.0106921	34.4913	21.3199	24.6415	1.55868	0	2.53492
lnc-EPHA6-1:2	EPHA6	-6.53357	0.00691987	0.0743845	22836.5	77872.6	145794	2879.67	16640.5	18209.2
lnc-EPHA6-1:5	EPHA6	-5.85944	0.0240903	0.137479	714.794	1653.75	2236.28	30.6541	254.745	501.069
lnc-ERICH1-13:1	ERICH1	-10.7884	0.000116148	0.00831942	110.224	227.363	216.236	25.7183	18.9834	5.91481
lnc-ERP44-3:1	ERP44	13.1505	0.0447585	0.187412	1.01717	0	0	10.1314	0	4.22487
lnc-ERRFI1-2:1	ERRFI1	-221.281	0.00547931	0.0647472	5.17833	4.81887	1.79966	0	0	0
lnc-ERVW-1-1:3	ERVW-1	-530.681	0.000706233	0.0231412	5.54821	13.4344	9.41359	0	0	0
lnc-EXOC2-11:2	EXOC2	-293.344	0.00166274	0.0346107	4.71598	2.92053	8.02924	0	0	0
lnc-EXOC3-2:2	EXOC3	51.2999	1.18944e-06	0.000593033	8.41478	1.75232	2.07653	415.909	28.1689	190.119
lnc-EXPH5-2:1	EXPH5	-6.6337	0.028094	0.147878	19.5112	33.148	14.1204	1.2989	0	9.2947
lnc-EZH2-7:1	EZH2	7.83727	0.00410218	0.0559108	2.68163	7.1553	14.5357	111.706	21.4329	57.4582
lnc-F13A1-2:1	F13A1	-59.343	0.000406473	0.017297	12.0211	9.3457	14.5357	0	0	0.844973
lnc-FAM101B-4:4	FAM101B	-191.498	0.0121173	0.0983252	3.32892	4.52682	2.3534	0	0	0
lnc-FAM106B-1:1	FAM106B	-150.595	0.00350725	0.0518996	1.75693	3.50464	2.7687	0	0	0
lnc-FAM120AOS-4:1	FAM120AOS	-44.6245	0.00195868	0.0373539	5.64068	6.27914	15.7816	0	0	0.844973
lnc-FAM122C-3:1	FAM122C	-422.881	0.000221046	0.0121	8.87713	8.32351	5.39897	0	0	0
lnc-FAM124A-4:2	FAM124A	55.8011	0.000502905	0.0194601	0.554821	0	0	23.1205	5.51131	7.60476
lnc-FAM138A-2:5	FAM138A	-9.7207	0.00590836	0.0678857	43.4609	9.63775	3.59931	1.81846	0	4.22487
lnc-FAM138A-3:1	FAM138A	-19.5988	0.00348968	0.0518676	8.59972	9.19967	22.2881	1.03912	0	0.844973
lnc-FAM138A-8:7	FAM138A	-23.5417	0.0391979	0.174934	3.88374	3.65066	8.58298	0	0	0.844973
lnc-FAM168B-1:2	FAM168B	29.1972	0.000194337	0.0111987	6.65785	1.31424	0	135.865	29.3937	70.9777
lnc-FAM177A1-1:3	FAM177A1	-7.94027	0.0198224	0.125436	20.1585	8.90762	18.8272	1.2989	0	5.06984
lnc-FAM19A5-10:1	FAM19A5	-351.772	0.000187117	0.0111492	5.82562	4.52682	8.44454	0	0	0
lnc-FAM20C-6:1	FAM20C	-100.377	0.037136	0.169516	1.20211	2.1904	1.93809	0	0	0
lnc-FAM22A-1:1	FAM22A	-243.543	0.000439665	0.0177424	6.56538	3.35861	3.04557	0	0	0
lnc-FAM22G-5:1	FAM22G	-17.7726	0.000492481	0.0191669	23.5799	7.1553	28.6561	2.07824	0	0.844973
lnc-FAM35A-1:1	FAM35A	57.1045	0.000591579	0.0204478	0	1.75232	0.138435	77.4146	0.612368	30.419
lnc-FAM3B-7:1	FAM3B	-256.676	0.000913038	0.0264978	7.58255	2.62848	3.46088	0	0	0
lnc-FAM46C-4:1	FAM46C	-5.78118	0.0214471	0.130299	15.7199	14.4566	28.1023	3.63693	6.12368	0
lnc-FAM50A-1:1	FAM50A	-11.3989	0.0333905	0.160929	6.75032	7.7394	5.26053	0.259781	0	1.68995
lnc-FAM50B-11:1	FAM50B	-26.3061	0.00193357	0.0370905	4.06868	9.19967	8.02924	0.519561	0	0
lnc-FAM65A-1:2	FAM65A	-397.74	0.000220043	0.0121	7.58255	4.67285	8.99828	0	0	0
lnc-FAM74A1-1:1	FAM74A1	-14.9206	0.00318602	0.0490599	16.8296	11.5361	12.4592	0.519561	0	2.53492
lnc-FAM78B-5:1	FAM78B	-131.097	0.00997097	0.0893073	2.40422	2.62848	1.93809	0	0	0
lnc-FAM82A1-11:1	FAM82A1	11.0452	0.00980157	0.0884638	12.8533	1.46027	4.84523	158.986	0	53.2333
lnc-FAM83E-1:1	FAM83E	-5.57163	0.0264232	0.143706	17.0145	25.8467	7.06019	2.85759	4.28657	1.68995
lnc-FAM86B2-5:1	FAM86B2	-276.355	0.00196862	0.0373539	5.91809	2.04437	6.78332	0	0	0
lnc-FARP1-3:1	FARP1	68.1184	8.29871e-05	0.00711726	4.34609	0	0.138435	228.347	28.1689	57.4582
lnc-FBXL2-1:1	FBXL2	-9.0332	0.00388104	0.0542138	20.7133	11.3901	15.0894	1.55868	1.22474	2.53492
lnc-FBXO45-5:1	FBXO45	-293.664	0.00341352	0.0513019	7.1202	7.44735	1.10748	0	0	0
lnc-FBXW10-3:2	FBXW10	-12.8907	0.0256897	0.141084	2.49669	8.76159	10.3826	1.2989	0	0
lnc-FGF6-2:1	FGF6	-8.28496	0.013796	0.104262	12.7609	7.7394	35.1625	3.89671	0	2.53492
lnc-FH-7:1	FH	14.5025	0.0339222	0.161932	0	0	1.52279	17.4053	0.612368	4.22487
lnc-FHOD3-1:1	FHOD3	-271.796	0.00969784	0.0882372	1.38705	2.33642	10.7979	0	0	0
lnc-FLII-1:1	FLII	-11.6694	0.00251363	0.0428147	28.2959	32.2719	29.0714	2.07824	0	5.91481
lnc-FLYWCH2-3:1	FLYWCH2	-19.4717	0.0227014	0.133927	7.30514	2.62848	2.49183	0	0	0.844973
lnc-FMNL1-3:1	FMNL1	15.7967	0.0034341	0.0514962	3.32892	1.31424	0.138435	58.4506	10.4103	7.60476
lnc-FOXB1-6:1	FOXB1	227.699	7.99204e-05	0.00711726	0	0	0	5.19561	4.28657	2.53492
lnc-FOXD4L6-1:10	FOXD4L6	-257.033	0.000794321	0.0245329	6.01056	4.23477	3.46088	0	0	0
lnc-FPR2-1:14	FPR2	-131.425	0.0102609	0.0909491	1.10964	4.23477	1.66122	0	0	0
lnc-FRG2C-3:6	FRG2C	-443.204	0.000669066	0.0224121	2.03434	7.00927	14.6741	0	0	0
lnc-FSD1L-3:1	FSD1L	6.61064	0.0156209	0.110999	1.29458	6.57119	2.21496	30.9139	26.9442	8.44973
lnc-FUBP3-1:1	FUBP3	58.7772	3.59929e-06	0.00105365	6.01056	0.730133	0.138435	256.923	52.6636	103.087
lnc-FUT9-1:1	FUT9	10.2381	0.043828	0.186248	1.20211	0.876159	0	18.1846	0	3.37989
lnc-FZD5-4:1	FZD5	-7.13316	0.00371229	0.0526999	71.8493	55.7821	38.3465	5.45539	3.06184	15.2095
lnc-G6PC-2:1	G6PC	-299.09	0.00150431	0.0331175	3.79127	2.7745	9.41359	0	0	0
lnc-GABRG1-1:1	GABRG1	-4.22129	0.017405	0.116721	54.8348	45.8523	43.0533	6.75429	18.9834	8.44973
lnc-GABRG3-4:1	GABRG3	17.4571	0.0150754	0.10926	3.14398	0.146027	0.415305	48.3192	0	17.7444
lnc-GAS6-3:1	GAS6	-201.099	0.00361618	0.0522018	6.01056	2.33642	2.3534	0	0	0
lnc-GCH1-2:1	GCH1	-207.395	0.00692694	0.0743845	1.01717	7.1553	2.90714	0	0	0
lnc-GDPD3-2:2	GDPD3	-16.2031	0.00831488	0.0814203	5.2708	7.59338	8.30611	0.519561	0.612368	0
lnc-GGCT-1:39	GGCT	-57.6908	0.000766803	0.0240055	12.0211	3.79669	19.6578	0	0	0.844973
lnc-GGCT-1:51	GGCT	-309.919	0.00178195	0.0357767	1.94187	1.75232	12.8745	0	0	0
lnc-GLIS3-2:2	GLIS3	16.4836	0.00133966	0.0311221	6.75032	1.31424	0	63.3864	27.5565	43.9386
lnc-GLP2R-1:1	GLP2R	-6.57969	0.025209	0.140177	19.0488	6.57119	14.6741	4.67605	0	0.844973
lnc-GMDS-9:1	GMDS	-10.0963	0.00562335	0.0657286	9.43195	24.0944	31.7016	2.33802	0	4.22487
lnc-GMNC-5:2	GMNC	-277.389	0.00360132	0.0521455	4.06868	1.60629	9.13672	0	0	0
lnc-GNAT1-2:2	GNAT1	7.77437	0.0307066	0.153974	1.29458	1.60629	8.30611	55.593	15.3092	16.0545
lnc-GNLY-2:4	GNLY	-17.5934	0.0206209	0.128067	1.66446	4.23477	5.1221	0	0	0.844973
lnc-GOLGA6L6-6:4	GOLGA6L6	-320.125	0.00127199	0.030478	3.42139	2.33642	11.3517	0	0	0
lnc-GOLGA8B-2:2	GOLGA8B	-8.82964	0.00845444	0.0815829	9.24701	28.9132	36.8237	2.07824	0	6.75978
lnc-GPM6B-1:3	GPM6B	-8.68516	0.00372083	0.0526999	64.5441	46.1444	44.0224	5.45539	0	12.6746
lnc-GPR137B-1:4	GPR137B	-11.581	0.0250855	0.139818	3.6988	3.21258	7.33706	0	0.612368	0.844973
lnc-GPR156-1:1	GPR156	-5.74051	0.0175369	0.117102	66.9484	61.4772	28.9329	7.53364	0	20.2794
lnc-GPR25-2:1	GPR25	-25.4792	0.00834005	0.0814203	23.9498	4.9649	5.95271	0	0	1.68995
lnc-GPR27-11:1	GPR27	9.06136	0.0145456	0.107517	6.56538	0	1.52279	31.6932	14.6968	27.8841
lnc-GPR39-7:1	GPR39	12.9952	2.88452e-05	0.00353118	142.681	247.807	335.844	1119.65	3230.85	5089.27
lnc-GPR39-7:2	GPR39	8.53542	0.000349362	0.0162957	124.742	212.323	300.82	615.42	2072.86	2757.15
lnc-GPR68-1:1	GPR68	-244.072	0.00379098	0.0532874	5.91809	3.35861	3.73775	0	0	0
lnc-GPR89B-15:1	GPR89B	-130.575	0.0113752	0.0954979	1.75693	1.31424	3.87618	0	0	0
lnc-GRHPR-7:1	GRHPR	-7.22796	0.0409525	0.179469	6.65785	9.78378	3.18401	1.03912	0	1.68995
lnc-GRK1-4:2	GRK1	7.21108	0.0447	0.187412	7.76749	3.50464	1.10748	35.8497	0	54.0783
lnc-GRM1-1:8	GRM1	-7.11972	0.0138803	0.104262	6.01056	29.7894	61.7421	7.53364	0	5.91481
lnc-GSDMC-6:1	GSDMC	-9.71789	0.000413608	0.017297	86.737	84.6954	60.4962	11.4303	3.67421	8.44973
lnc-GTF2F2-13:1	GTF2F2	-6.1373	0.0211533	0.129595	19.2338	11.244	21.319	5.45539	0	2.53492
lnc-GTF2IRD2B-3:1	GTF2IRD2B	10.4716	0.0149135	0.109187	2.49669	3.21258	1.93809	53.5148	3.06184	23.6592
lnc-GXYLT1-4:2	GXYLT1	37.5769	0.00139388	0.0318136	0.647291	0.584106	0	33.7715	3.67421	10.9846
lnc-H2BFM-2:1	H2BFM	-21.6772	0.000132241	0.00917919	34.8612	27.599	35.0241	0.779342	0	4.22487
lnc-H2BFM-5:1	H2BFM	-3.78475	0.0329701	0.160092	34.4913	68.1944	102.442	14.0281	34.905	5.06984
lnc-H2BFWT-3:1	H2BFWT	-7.93846	0.0303266	0.152949	4.71598	9.49172	11.9054	0.259781	3.06184	0
lnc-HAND1-8:2	HAND1	-28.5933	0.0240452	0.137479	3.14398	1.75232	14.3973	0	0	0.844973
lnc-HAND2-4:1	HAND2	-3.38448	0.0439818	0.186248	36.8956	74.7656	59.6655	28.3161	4.89894	16.8995
lnc-HAO2-2:12	HAO2	-6.73418	0.00119492	0.0293627	207.688	308.408	519.27	49.0985	35.5173	69.2878
lnc-HAUS5-3:2	HAUS5	14.1	6.38737e-06	0.00161254	26046.4	39351.5	49790.1	275063	682749	666342
lnc-HCFC1-2:1	HCFC1	9.05861	0.0303945	0.152949	5.64068	8.61556	1.10748	128.851	0	10.1397
lnc-HDAC2-12:2	HDAC2	-2533.11	3.33e-10	2.24209e-06	26.9088	55.9282	52.8822	0	0	0
lnc-HEYL-5:1	HEYL	-5.56644	0.024239	0.13749	20.3434	17.3772	8.99828	3.37715	0	5.06984
lnc-HIGD1C-1:13	HIGD1C	-13.6731	0.0212406	0.129894	6.75032	5.69503	5.81428	0	0	1.68995
lnc-HIST1H4H-2:1	HIST1H4H	-4.71059	0.0218745	0.131736	15.4425	29.2053	58.8349	4.15649	10.4103	7.60476
lnc-HJURP-6:1	HJURP	-7.09033	0.0399217	0.176721	16.7371	16.355	0.969046	2.85759	0	1.68995
lnc-HLA-C-2:1	HLA-C	-16.635	0.00237489	0.0414252	8.22984	34.7543	19.3809	1.2989	0	2.53492
lnc-HMBS-3:1	HMBS	-14.1822	0.00924517	0.0862178	7.02773	2.7745	6.22958	0.779342	0	0
lnc-HMGA1-2:4	HMGA1	-332.619	0.003654	0.0523329	1.47952	12.8503	3.46088	0	0	0
lnc-HMGB2-3:1	HMGB2	15.8791	0.00023836	0.0129426	7.58255	5.25695	6.92176	193.796	41.0286	79.4275
lnc-HNF1B-3:1	HNF1B	-11.263	0.0242016	0.13749	7.67502	4.08874	10.5211	0	0.612368	1.68995
lnc-HOGA1-1:1	HOGA1	-7.17069	0.00130695	0.0308796	79.5243	56.0742	51.3594	7.27385	10.4103	8.44973
lnc-HOMER2-3:2	HOMER2	-35.9702	0.0116421	0.0961282	6.38044	3.35861	5.81428	0.259781	0	0
lnc-HORMAD2-2:1	HORMAD2	4.29662	0.0419792	0.181416	20.8982	4.67285	11.2132	101.834	7.96078	48.1635
lnc-HOXB8-1:2	HOXB8	-10.2047	0.0306208	0.153743	5.73315	3.21258	1.38435	0.259781	0	0.844973
lnc-HOXC4-2:1	HOXC4	-170.61	0.00340747	0.0513019	4.34609	3.06656	1.66122	0	0	0
lnc-HPS6-1:1	HPS6	-18.8635	0.0212281	0.129894	4.53103	4.08874	3.32244	0	0	0.844973
lnc-HS6ST3-3:1	HS6ST3	-101.328	0.0366406	0.168167	1.66446	2.1904	1.52279	0	0	0
lnc-HSPB1-3:1	HSPB1	5.60408	0.00652997	0.0716063	8.32231	8.17748	13.0129	71.9592	18.371	75.2026
lnc-HYAL4-4:1	HYAL4	15.105	0.0352775	0.164643	7.67502	0.876159	0	83.9091	0	46.4735
lnc-IDS-8:1	IDS	-5.05613	0.00436889	0.0574526	169.128	277.304	436.901	62.8669	80.2202	31.264
lnc-IFT52-1:2	IFT52	-39.6456	0.000119862	0.00849503	36.3407	22.7801	18.9656	0	0	2.53492
lnc-IGFBP3-4:4	IGFBP3	-15.6647	0.0457055	0.189376	1.47952	4.3808	4.42992	0	0	0.844973
lnc-IGJ-1:1	IGJ	13.3777	0.0176179	0.117215	2.03434	2.48245	0	49.6181	1.8371	9.2947
lnc-IGSF9-1:1	IGSF9	-5.94895	0.0401673	0.177342	12.5759	20.2977	9.82889	0	1.8371	5.91481
lnc-IKBIP-1:1	IKBIP	-197.415	0.00630696	0.0698434	3.42139	3.50464	3.59931	0	0	0
lnc-IKZF2-3:2	IKZF2	-33.6986	0.0104141	0.0916574	1.66446	5.84106	7.19863	0.259781	0	0
lnc-IL17RA-13:1	IL17RA	-9.34673	0.0399834	0.176762	4.06868	4.52682	4.29149	0.519561	0	0.844973
lnc-IL22RA2-2:1	IL22RA2	17.9265	0.00777389	0.0784991	1.38705	0.146027	0.830611	28.3161	0	15.2095
lnc-IL34-4:1	IL34	-30.8286	0.00935838	0.0867906	2.03434	4.08874	11.9054	0	0.612368	0
lnc-IL6-12:1	IL6	-8.2439	0.017949	0.11883	13.8705	10.3679	13.5666	3.89671	0	0
lnc-ILKAP-2:1	ILKAP	-6.81539	0.0129299	0.100528	24.0422	18.3993	27.8255	0.519561	6.73605	3.37989
lnc-INTS7-3:1	INTS7	26.2286	0.0146547	0.107836	1.01717	2.1904	0	65.7245	2.44947	16.8995
lnc-IQGAP3-2:2	IQGAP3	5.61188	0.0193161	0.122951	3.32892	6.71722	1.24592	37.6682	11.0226	14.3645
lnc-IRAK3-5:1	IRAK3	-5.8008	0.012544	0.099014	20.9907	23.5103	40.1462	1.2989	8.57315	5.06984
lnc-IRAK4-4:1	IRAK4	-14.3318	0.00164298	0.0344414	58.4411	50.9632	68.5254	0.519561	0	12.6746
lnc-IRF2-2:7	IRF2	-51.793	0.00057401	0.0204478	15.9049	10.2219	5.1221	0	0	0.844973
lnc-IRGC-1:1	IRGC	-359.276	0.00261474	0.0434693	2.68163	1.02219	15.5047	0	0	0
lnc-IRS2-5:1	IRS2	-6.19002	0.00395148	0.0547073	37.4504	44.3921	98.1505	17.9249	3.67421	6.75978
lnc-IRS4-2:1	IRS4	6.20928	0.00505881	0.0622963	50495.2	67388.7	144318	86855.8	464329	1.0769e+06
lnc-IRX3-5:1	IRX3	-174.88	0.0107246	0.0924461	3.79127	2.33642	3.18401	0	0	0
lnc-IRX3-6:1	IRX3	-15.6443	0.0011186	0.0288794	14.3329	32.4179	16.3353	0.779342	2.44947	0.844973
lnc-ITFG2-2:1	ITFG2	48.827	9.41272e-07	0.000576356	0.924701	0.43808	0.553741	57.4115	15.9216	23.6592
lnc-ITGA11-3:1	ITGA11	-13.2527	0.0209866	0.128691	1.38705	7.00927	6.22958	0.779342	0	0
lnc-ITIH2-9:1	ITIH2	-5.45451	0.0412976	0.17979	14.2404	7.00927	3.04557	3.11737	0	0.844973
lnc-ITPR3-1:8	ITPR3	-193.336	0.015178	0.10965	3.14398	4.67285	2.49183	0	0	0
lnc-ITSN2-2:1	ITSN2	-152.22	0.00826778	0.0814203	3.51386	2.92053	1.66122	0	0	0
lnc-JMJD1C-7:1	JMJD1C	-796.164	4.57673e-06	0.00128396	20.066	7.00927	15.5047	0	0	0
lnc-JOSD1-1:6	JOSD1	-299.32	0.00275434	0.0449923	8.22984	5.11093	2.63027	0	0	0
lnc-JPH1-6:1	JPH1	-5.11819	0.0156285	0.110999	32.0871	16.0629	9.41359	2.33802	4.89894	4.22487
lnc-JUND-1:1	JUND	-352.416	0.00114533	0.0291705	1.29458	2.1904	15.3663	0	0	0
lnc-KAT6A-1:1	KAT6A	-892.659	2.36554e-05	0.00318544	7.95243	4.81887	35.0241	0	0	0
lnc-KAT6A-3:1	KAT6A	-12.4406	0.000312445	0.0153864	65.8387	58.5566	35.9931	0.779342	6.73605	5.91481
lnc-KATNAL1-8:1	KATNAL1	-7.07394	0.0166066	0.113777	36.5257	14.1646	17.7197	8.0532	0	0.844973
lnc-KCNIP4-3:1	KCNIP4	16.1418	0.0221894	0.132414	0	3.50464	0.415305	48.0594	0	15.2095
lnc-KCNJ5-2:1	KCNJ5	-295.695	0.00697752	0.0748084	1.10964	3.06656	11.6286	0	0	0
lnc-KCNK7-6:1	KCNK7	-25.8871	0.0106309	0.0922997	1.57199	2.7745	12.0439	0	0	0.844973
lnc-KCNQ2-1:3	KCNQ2	-8.28351	0.0438783	0.186248	13.6856	7.59338	2.7687	0	0	3.37989
lnc-KCNRG-4:1	KCNRG	-6.02687	0.00625799	0.0695298	53.6327	38.9891	15.2279	5.71517	3.06184	9.2947
lnc-KDM4C-1:3	KDM4C	-434.421	0.00251814	0.0428147	4.80845	5.54901	12.8745	0	0	0
lnc-KIAA0087-2:2	KIAA0087	15.5463	0.0342353	0.162599	1.01717	2.48245	0	37.1486	0	17.7444
lnc-KIAA0087-3:1	KIAA0087	-283.224	0.00529923	0.0638277	2.7741	8.76159	3.59931	0	0	0
lnc-KIAA1257-3:1	KIAA1257	-8.34886	0.0258207	0.141342	7.1202	10.5139	11.4901	1.2989	1.22474	0.844973
lnc-KIAA1383-4:3	KIAA1383	-16.1213	0.00402914	0.0553637	12.1136	17.0851	41.8074	3.11737	0	0.844973
lnc-KIAA1737-2:2	KIAA1737	23.5438	0.000874842	0.0260937	2.31175	2.04437	0	84.1689	4.28657	15.2095
lnc-KLF14-1:5	KLF14	-8.90632	0.0337943	0.161833	4.25362	4.52682	6.50645	1.2989	0	0
lnc-KLF5-6:2	KLF5	-556.455	0.000144417	0.00969899	14.5178	10.6599	4.56836	0	0	0
lnc-KLF8-3:1	KLF8	-16.857	0.0126435	0.0996826	1.38705	4.81887	22.2881	1.2989	0	0
lnc-KLHL14-2:1	KLHL14	-7.4702	0.0097697	0.0884638	12.4835	20.4437	11.9054	1.81846	2.44947	1.68995
lnc-KLHL8-1:1	KLHL8	16.1015	6.08035e-05	0.00579226	10.1717	5.40298	4.42992	208.604	21.4329	92.947
lnc-KPNA7-1:1	KPNA7	11.5937	0.0160072	0.112267	0.924701	2.1904	0.27687	25.9781	0	13.5196
lnc-KYNU-6:3	KYNU	-309.574	0.00824636	0.0814203	1.75693	2.1904	12.5976	0	0	0
lnc-L3MBTL2-1:1	L3MBTL2	42.3854	9.61962e-06	0.00205865	2.58916	2.92053	0.969046	178.729	13.4721	84.4973
lnc-LACE1-4:1	LACE1	-10.7732	0.0318676	0.157421	13.5931	15.9169	4.29149	0.259781	0.612368	2.53492
lnc-LAIR1-1:1	LAIR1	-189.873	0.00607721	0.0687135	2.7741	2.92053	4.42992	0	0	0
lnc-LANCL2-9:1	LANCL2	13.934	0.013575	0.103511	3.60633	0.292053	0	43.1236	5.51131	6.75978
lnc-LAT2-2:1	LAT2	-127.758	0.00465134	0.0590784	3.05151	2.48245	1.24592	0	0	0
lnc-LBX1-1:1	LBX1	-189.797	0.00425453	0.0564882	6.65785	2.04437	1.38435	0	0	0
lnc-LCA5L-3:5	LCA5L	-183.458	0.003523	0.0519045	4.34609	3.06656	2.3534	0	0	0
lnc-LCOR-2:1	LCOR	-28.9443	0.0141931	0.105711	1.94187	2.7745	7.8908	0.259781	0	0
lnc-LDHAL6A-1:1	LDHAL6A	-24.0678	0.00873124	0.0835505	3.05151	4.67285	7.19863	0	0	0.844973
lnc-LEP-2:1	LEP	30.141	0.000177739	0.0108508	2.31175	0	2.63027	79.7526	12.2474	59.1481
lnc-LHFP-9:1	LHFP	-24.0231	0.000194139	0.0111987	36.0633	60.8931	94.8281	0	7.34841	0.844973
lnc-LHPP-2:1	LHPP	21.7433	4.25904e-05	0.00455177	10.819	4.9649	1.79966	231.464	26.9442	125.901
lnc-LHX2-8:1	LHX2	-16.6117	0.0305383	0.153444	3.32892	1.60629	5.67584	0	0	0.844973
lnc-LIMS3-1:16	LIMS3	59.5835	8.28946e-05	0.00711726	2.03434	0	5.67584	211.202	86.3439	164.77
lnc-LIMS3-2:2	LIMS3	-267.826	0.00373575	0.0527313	4.71598	3.21258	6.36802	0	0	0
lnc-LMAN2-1:1	LMAN2	11.347	0.0158273	0.112174	4.53103	0.730133	0.138435	32.7323	13.4721	16.0545
lnc-LMF1-3:7	LMF1	6.7526	0.00575226	0.0666609	19.7886	5.84106	8.58298	142.879	9.79788	78.5825
lnc-LONP2-11:1	LONP2	-5.09818	0.0286969	0.149027	12.1136	32.1258	57.8659	7.79342	11.0226	0.844973
lnc-LPAR2-1:2	LPAR2	4.87704	0.0292145	0.150613	8.41478	4.81887	4.56836	61.568	5.51131	19.4344
lnc-LPHN3-1:2	LPHN3	-8.81913	0.0363005	0.167176	8.32231	3.35861	9.96733	0.259781	0	2.53492
lnc-LPIN1-4:2	LPIN1	-7.15266	0.00997462	0.0893073	25.4293	30.9576	30.1789	3.89671	0	8.44973
lnc-LRG1-1:1	LRG1	-5.21203	0.0123222	0.0984856	51.6908	49.9411	57.589	8.0532	1.8371	21.1243
lnc-LRIG2-5:1	LRIG2	-7.82911	0.0461048	0.19029	13.963	4.23477	3.04557	1.03912	0	1.68995
lnc-LRRC36-1:1	LRRC36	-17.5887	0.0267116	0.14409	2.86657	4.67285	9.27515	0.259781	0.612368	0
lnc-LRRC3C-1:5	LRRC3C	-199.17	0.00556221	0.0651311	5.08586	2.33642	3.18401	0	0	0
lnc-LRRTM4-6:1	LRRTM4	6.77698	0.001911	0.0369168	19.7886	28.1831	42.7765	82.3504	145.744	387.843
lnc-LRTM2-1:1	LRTM2	-159.019	0.0101601	0.0903676	1.57199	2.33642	4.56836	0	0	0
lnc-LTBP1-1:5	LTBP1	-10.3493	0.00366089	0.0523329	33.2892	8.90762	29.2098	2.07824	0	5.06984
lnc-LTBP3-2:4	LTBP3	7.09709	0.0225451	0.133389	7.1202	27.1609	17.9966	139.242	208.817	22.8143
lnc-LTC4S-2:1	LTC4S	25.2438	0.0294522	0.151375	0	0.146027	1.10748	10.9108	0.612368	21.1243
lnc-LTC4S-2:2	LTC4S	-151.172	0.00794934	0.0796472	4.34609	1.60629	2.07653	0	0	0
lnc-LXN-3:1	LXN	-145.243	0.00862336	0.0827081	2.21928	2.1904	3.32244	0	0	0
lnc-LY6E-3:3	LY6E	-13.5528	0.0109357	0.0930851	6.75032	6.86325	14.2588	0	0	2.53492
lnc-LY9-1:1	LY9	-13.744	0.0120095	0.0981312	7.76749	1.46027	3.87618	0.259781	0.612368	0
lnc-LYRM2-2:4	LYRM2	-11.5206	0.00510822	0.0624205	16.6446	23.2182	18.4119	0	3.67421	1.68995
lnc-MAFA-2:1	MAFA	36.3131	0.00231672	0.0407271	0.554821	1.31424	0	43.3833	3.06184	22.8143
lnc-MAP1LC3A-2:1	MAP1LC3A	5.1323	0.0257827	0.141342	2.12681	4.3808	7.61393	49.6181	10.4103	11.8296
lnc-MAP3K3-2:1	MAP3K3	6.78012	0.0287075	0.149027	5.36327	3.35861	2.90714	61.8278	0	16.8995
lnc-MAPK6-5:1	MAPK6	-152.643	0.00248763	0.0427275	2.31175	2.7745	3.04557	0	0	0
lnc-MAPK8-2:8	MAPK8	-59.5939	0.000589275	0.0204478	13.6856	9.05364	4.15305	0.259781	0	0
lnc-MARCH10-1:1	43169	30.3158	0.000577035	0.0204478	6.10303	1.02219	0	133.787	37.3544	48.1635
lnc-MASP1-3:1	MASP1	-18.8556	0.00260253	0.0434591	12.0211	9.9298	31.0095	0	0	3.37989
lnc-MAX-2:2	MAX	-84.1438	0.0499595	0.198547	1.47952	1.31424	1.66122	0	0	0
lnc-MBD3-3:2	MBD3	350.274	2.62689e-06	0.000842232	0.0924701	0	0	32.7323	6.73605	17.7444
lnc-MBNL1-3:3	MBNL1	-298.653	0.00263571	0.0434956	4.06868	4.9649	6.92176	0	0	0
lnc-MCMBP-3:1	MCMBP	11.4828	0.00117753	0.0293627	6.10303	1.89834	3.73775	96.8981	12.8597	25.3492
lnc-MDFIC-3:1	MDFIC	-836.494	1.54415e-05	0.00227738	5.54821	9.3457	29.902	0	0	0
lnc-MED12L-3:1	MED12L	-251.769	0.00394711	0.0547073	7.49008	2.1904	3.73775	0	0	0
lnc-MED14-4:1	MED14	-571.788	0.000108437	0.00801871	17.107	11.098	2.3534	0	0	0
lnc-MED27-2:1	MED27	41.4853	0.00048984	0.0191669	3.60633	0.730133	0.138435	130.67	15.9216	43.0936
lnc-MEF2A-7:1	MEF2A	-15.1466	0.00466844	0.0590784	33.1043	17.6692	29.2098	0	0	5.91481
lnc-MEIS1-10:2	MEIS1	-4.48118	0.0322886	0.15857	23.3949	17.5232	48.3139	3.37715	9.18552	7.60476
lnc-METTL2B-4:1	METTL2B	-7.02785	0.0473739	0.193824	7.39761	4.52682	7.61393	0.519561	0	2.53492
lnc-METTL2B-6:1	METTL2B	27.9287	2.4443e-05	0.00319296	2.86657	5.54901	5.26053	277.446	20.8205	83.6523
lnc-MFSD6-1:2	MFSD6	8.19738	0.0378246	0.171612	3.32892	2.04437	0.138435	31.953	0	13.5196
lnc-MGAT5-3:1	MGAT5	-215.71	0.00205045	0.0381373	3.51386	4.67285	3.32244	0	0	0
lnc-MICAL2-4:1	MICAL2	-15.7513	0.00665046	0.0724556	17.9392	9.78378	4.15305	1.55868	0	0
lnc-MID1-1:1	MID1	-8.39731	0.0138855	0.104262	8.69219	16.647	19.104	3.89671	0	0.844973
lnc-MINA-3:1	MINA	-10.3462	0.000515457	0.0195613	26636.8	83038	190573	4832.96	10383.3	13804.3
lnc-MINA-3:5	MINA	-4.0259	0.0341716	0.162599	6788.69	30834.7	31171.9	2502.73	8671.74	5913.97
lnc-MIOS-4:1	MIOS	-12.6029	0.00166551	0.0346107	15.4425	36.2146	96.9046	2.85759	7.96078	0.844973
lnc-MIXL1-7:1	MIXL1	-208.774	0.00199122	0.0375543	4.99339	3.35861	2.7687	0	0	0
lnc-MKLN1-4:1	MKLN1	-12.1794	0.00939488	0.0869125	10.4491	1.89834	21.319	0.519561	0	2.53492
lnc-MLL3-3:1	MLL3	-352.066	0.000440069	0.0177424	4.62351	12.2662	1.93809	0	0	0
lnc-MLST8-3:1	MLST8	-7.05581	0.00544319	0.0646366	22.4702	15.4788	14.1204	3.89671	0.612368	2.53492
lnc-MMADHC-5:1	MMADHC	-333.341	0.00326099	0.0497875	1.10964	4.67285	12.0439	0	0	0
lnc-MMD2-2:1	MMD2	-12.9045	0.000743402	0.0235696	45.4028	45.4142	49.9751	4.93583	0	5.91481
lnc-MMRN2-2:1	MMRN2	11.3362	0.0232859	0.135744	12.7609	5.40298	0	145.737	0	60.8381
lnc-MNS1-3:3	MNS1	-19.1833	0.0231693	0.135276	6.1955	1.75232	4.29149	0	0	0.844973
lnc-MNX1-10:1	MNX1	-5.26986	0.0116429	0.0961282	19.3263	77.6861	80.4308	18.1846	9.79788	5.06984
lnc-MNX1-3:1	MNX1	-44.2772	0.000110945	0.00803221	16.922	14.0185	20.35	0.779342	0	0
lnc-MOAP1-1:1	MOAP1	-9.88575	0.000595332	0.0204509	52.8929	71.1149	46.5142	8.0532	0.612368	8.44973
lnc-MOGAT2-4:1	MOGAT2	-17.9812	0.000208005	0.0116708	34.9537	15.6248	37.9312	2.85759	0	1.68995
lnc-MRPL19-1:1	MRPL19	-93.2891	0.0207928	0.128115	1.10964	2.04437	1.79966	0	0	0
lnc-MRPL30-1:2	MRPL30	-12.7679	0.021965	0.131927	6.84279	6.42517	13.8435	0	0	2.53492
lnc-MRPL33-1:2	MRPL33	-30.7653	0.000895996	0.0262953	16.2747	14.8947	7.8908	0	0	1.68995
lnc-MRPL40-2:1	MRPL40	-9.6169	0.00596297	0.0679334	23.8573	11.6821	9.41359	2.07824	0	2.53492
lnc-MRPS24-4:1	MRPS24	-8.85149	0.00704115	0.0749492	31.4398	21.3199	19.5194	1.81846	0	6.75978
lnc-MRPS5-12:1	MRPS5	-6.54919	0.0333659	0.160929	8.87713	4.52682	4.15305	1.55868	0	0.844973
lnc-MTA3-10:1	MTA3	-118.306	0.0140694	0.105138	2.03434	1.89834	2.3534	0	0	0
lnc-MTMR7-2:1	MTMR7	-91.9088	0.0256042	0.140959	1.29458	2.33642	1.24592	0	0	0
lnc-MTPAP-1:1	MTPAP	-18.5528	0.0121482	0.0983727	16.3672	2.48245	6.09115	0	0	1.68995
lnc-MTRF1-5:1	MTRF1	-9.76378	0.0130462	0.101115	4.99339	6.57119	23.2571	2.33802	0	0.844973
lnc-MYBBP1A-2:1	MYBBP1A	-8.72082	0.0480207	0.19506	7.76749	3.50464	7.19863	0	0	2.53492
lnc-MYEF2-1:4	MYEF2	-24.5004	0.00979466	0.0884638	3.60633	1.75232	5.53741	0.259781	0	0
lnc-MYO10-8:1	MYO10	8.77169	0.0149812	0.109187	3.6988	2.48245	2.49183	41.8247	0	34.6439
lnc-MYO16-7:1	MYO16	-8.62923	0.000792078	0.0245329	3147.5	5618.37	16211.9	1073.93	964.479	855.958
lnc-MYO16-8:1	MYO16	-278.617	0.0030678	0.0482722	3.60633	6.57119	4.70679	0	0	0
lnc-MYOCD-3:1	MYOCD	-15.3463	0.016369	0.113504	7.58255	11.3901	1.52279	0	0	1.68995
lnc-NAB1-2:2	NAB1	19.3492	0.000830792	0.025197	1.20211	2.33642	0.415305	50.3974	3.67421	22.8143
lnc-NANOS1-7:1	NANOS1	-225.187	0.00609267	0.0687135	9.70936	1.02219	1.24592	0	0	0
lnc-NAP1L2-4:1	NAP1L2	-6.30039	0.0280905	0.147878	3.97621	15.7709	19.9347	1.2989	4.89894	0
lnc-NBEA-8:1	NBEA	-4.76421	0.0154596	0.110498	24.6895	31.8338	51.3594	5.19561	9.18552	8.44973
lnc-NCAPG2-4:1	NCAPG2	-8.16934	0.0146009	0.107558	31.9947	13.5805	9.96733	1.2989	0	5.91481
lnc-NCDN-2:1	NCDN	-20.0425	0.00396512	0.0547073	7.30514	10.2219	5.1221	0.779342	0	0
lnc-NCOA1-2:1	NCOA1	10.0874	0.00453335	0.0584732	3.05151	2.92053	1.93809	65.2049	6.73605	7.60476
lnc-NCOA3-23:1	NCOA3	15.4462	0.00447607	0.0579565	8.32231	0.876159	0.27687	97.6775	1.22474	49.0084
lnc-NDFIP1-7:1	NDFIP1	-15.9054	0.0343581	0.162599	5.36327	6.86325	10.2442	0	0	1.68995
lnc-NDUFB3-3:3	NDUFB3	-8.14009	0.00385816	0.0540062	46.7899	34.9003	31.2863	6.23473	0	7.60476
lnc-NDUFS1-2:1	NDUFS1	-1019.51	2.15604e-06	0.000764032	16.4597	22.3421	15.7816	0	0	0
lnc-NECAB1-2:1	NECAB1	-13.8143	0.0116502	0.0961282	9.06207	14.7487	12.736	1.55868	0	0.844973
lnc-NEURL-2:1	NEURL	-25.8109	1.5238e-05	0.00227738	70.3697	78.2702	47.7601	2.07824	0	5.91481
lnc-NEUROD1-2:1	NEUROD1	13.2751	0.0481363	0.19506	0.18494	1.16821	0.27687	20.0031	0	1.68995
lnc-NFE2L2-1:2	NFE2L2	-5.9782	0.0127802	0.0998249	41.6115	28.3291	19.2425	5.19561	0.612368	9.2947
lnc-NKD1-1:1	NKD1	-203.843	0.00829642	0.0814203	1.29458	3.35861	6.22958	0	0	0
lnc-NKD1-3:1	NKD1	-114.826	0.0150336	0.109192	1.8494	1.89834	2.3534	0	0	0
lnc-NLGN2-1:1	NLGN2	6.75168	0.0422577	0.182035	8.13737	0.876159	6.50645	79.4928	0	25.3492
lnc-NLRP1-1:1	NLRP1	-214.377	0.00634774	0.0701795	1.66446	7.1553	2.63027	0	0	0
lnc-NLRP2-4:1	NLRP2	-143.444	0.018066	0.11937	4.06868	1.75232	1.79966	0	0	0
lnc-NLRP3-1:3	NLRP3	19.3493	0.000368238	0.016529	7.1202	2.33642	0.138435	123.396	36.1297	27.8841
lnc-NMS-2:1	NMS	15.1135	0.000410411	0.017297	2.68163	4.08874	8.72141	148.075	7.34841	78.5825
lnc-NOD1-4:1	NOD1	-8.37132	0.00162028	0.0341987	51.9682	45.9983	47.0679	2.85759	2.44947	12.6746
lnc-NQO2-12:1	NQO2	-172.051	0.018523	0.121319	3.32892	3.06656	2.7687	0	0	0
lnc-NR2E1-4:1	NR2E1	12.5459	0.00726171	0.0762763	7.58255	0.876159	3.04557	91.183	0	54.0783
lnc-NRARP-1:1	NRARP	11.3576	0.00111283	0.0288794	9.80183	2.62848	2.07653	120.798	11.635	32.9539
lnc-NSUN5-2:1	NSUN5	-4.85536	0.041839	0.1811	89.3261	15.7709	21.319	18.7042	0	6.75978
lnc-NT5E-2:1	NT5E	-483.864	0.00116199	0.0293022	3.14398	6.13311	16.6122	0	0	0
lnc-NTRK3-4:1	NTRK3	23.2176	0.00505048	0.0622963	2.7741	0	1.24592	72.219	0	22.8143
lnc-NTSR2-6:1	NTSR2	-48.3872	0.000530154	0.0197282	5.91809	4.9649	11.2132	0.259781	0	0
lnc-NUCB1-3:1	NUCB1	-3.74878	0.0441324	0.186531	20.7133	11.3901	13.9819	3.11737	4.28657	5.06984
lnc-NUDT2-4:1	NUDT2	-12.3987	0.0010809	0.0288271	69.445	66.7341	42.7765	3.11737	0	11.8296
lnc-NUMA1-3:2	NUMA1	-15.8134	0.00939735	0.0869125	18.9564	5.25695	21.5959	0	0	3.37989
lnc-NUP43-1:1	NUP43	-272.234	0.00111415	0.0288794	6.56538	1.16821	6.78332	0	0	0
lnc-NXPH1-2:3	NXPH1	9.19564	0.033372	0.160929	0.0924701	0	6.78332	27.0172	11.0226	25.3492
lnc-OAZ3-2:2	OAZ3	12.1957	0.00617486	0.0690577	3.60633	1.02219	3.18401	54.5539	0	41.4037
lnc-OCM2-1:1	OCM2	-87.4579	0.0297111	0.151894	1.20211	2.1904	1.24592	0	0	0
lnc-ODZ1-6:1	ODZ1	-142.575	0.00623615	0.0694432	2.58916	2.92053	2.07653	0	0	0
lnc-OR10Q1-1:1	OR10Q1	-235.454	0.00111661	0.0288794	6.10303	4.08874	2.3534	0	0	0
lnc-OR4F16-8:1	OR4F16	-10.9881	0.000383752	0.016778	426.657	1215.96	2678.86	116.122	124.311	152.94
lnc-OR5A2-2:1	OR5A2	-11.8848	0.00262439	0.0434956	17.2919	14.6027	50.1135	3.37715	0	3.37989
lnc-OR9A2-3:1	OR9A2	-15.2311	0.00891949	0.0842713	1.8494	11.244	17.5813	1.55868	0	0
lnc-ORC5-1:1	ORC5	-8.62687	0.000770116	0.0240055	65.099	104.701	183.288	13.2488	4.28657	23.6592
lnc-OSR2-1:1	OSR2	-23.7186	0.000198957	0.0112569	55.1122	32.4179	41.3921	0.259781	0	5.91481
lnc-OST4-9:1	OST4	-17.0285	0.00105248	0.0284593	18.679	19.5676	13.5666	1.2989	0	1.68995
lnc-OSTC-2:1	OSTC	-31.5993	0.0171699	0.115605	2.68163	2.1904	8.72141	0.259781	0	0
lnc-OXR1-1:1	OXR1	57.9881	0.000174329	0.0108508	1.94187	0	0.415305	90.6634	16.5339	35.4889
lnc-P2RX2-3:1	P2RX2	6.82724	0.0175835	0.117102	2.7741	1.46027	1.10748	23.64	8.57315	4.22487
lnc-PABPC1-3:1	PABPC1	-165.18	0.011536	0.0961282	2.03434	5.11093	1.66122	0	0	0
lnc-PABPC4-1:4	PABPC4	-28.6155	0.00246073	0.0424822	12.6684	3.94272	6.22958	0.519561	0	0
lnc-PACSIN1-1:3	PACSIN1	10.7162	0.0110682	0.0938567	3.42139	0.146027	0.969046	39.2269	7.34841	2.53492
lnc-PAFAH1B2-2:7	PAFAH1B2	-10.4398	0.0438302	0.186248	3.32892	13.5805	4.15305	1.03912	0	0.844973
lnc-PANK3-6:1	PANK3	-120.978	0.00441753	0.0578662	2.31175	1.89834	2.21496	0	0	0
lnc-PARN-14:1	PARN	-7.36006	0.00090865	0.0264846	115.218	168.807	136.497	13.2488	9.79788	34.6439
lnc-PAWR-1:3	PAWR	-5.83566	0.0457825	0.189461	3.6988	15.3328	8.44454	3.37715	0	0.844973
lnc-PCCA-4:1	PCCA	-5.46438	0.0107655	0.0925313	17.6618	45.9983	76.6931	10.9108	3.67421	10.9846
lnc-PCDH7-10:1	PCDH7	-11.0881	0.0190267	0.122123	8.0449	10.2219	0.830611	1.2989	0	0
lnc-PCDH8-6:3	PCDH8	-32.8191	0.000340081	0.0160123	22.2853	10.952	21.1806	0.259781	0	1.68995
lnc-PCID2-1:2	PCID2	-344.948	0.000712509	0.0231755	3.23645	4.9649	10.2442	0	0	0
lnc-PCID2-4:1	PCID2	-6.85893	0.0343717	0.162599	10.9115	25.1166	10.5211	4.67605	0	1.68995
lnc-PDE6C-1:1	PDE6C	-6.83524	0.0100312	0.0894717	23.4874	28.0371	24.2261	6.49451	0	4.22487
lnc-PDK3-11:1	PDK3	-7.54191	0.00195632	0.0373539	44.1082	61.4772	67.8332	10.9108	9.79788	1.68995
lnc-PDLIM2-2:2	PDLIM2	11.9596	0.00178538	0.0357767	8.78466	3.21258	0.830611	95.859	6.12368	52.3883
lnc-PDPK1-3:1	PDPK1	-10.74	0.0159966	0.112267	11.7437	1.31424	8.85985	1.03912	0	0.844973
lnc-PDZK1IP1-4:1	PDZK1IP1	-12.058	0.000105724	0.00799824	48.2694	105.285	175.674	7.27385	11.635	8.44973
lnc-PELI2-8:1	PELI2	-10.2577	0.00242337	0.0420529	25.1519	39.1351	47.7601	2.85759	0	8.44973
lnc-PEX14-3:1	PEX14	-186.658	0.00598331	0.0680028	3.60633	4.81887	1.52279	0	0	0
lnc-PGPEP1-5:1	PGPEP1	19.718	0.00549745	0.0648237	4.90092	0.292053	0.138435	68.3223	9.18552	29.5741
lnc-PGPEP1L-3:1	PGPEP1L	-29.6816	0.011744	0.0966652	8.0449	3.79669	1.10748	0.259781	0	0
lnc-PHF10-4:1	PHF10	-6.97388	0.0349901	0.163928	23.3949	7.59338	8.02924	0.259781	0	5.91481
lnc-PHF3-11:1	PHF3	-168.948	0.00829295	0.0814203	5.45574	1.16821	2.3534	0	0	0
lnc-PHKA2-2:1	PHKA2	-18.8503	0.0129056	0.100455	4.80845	1.46027	5.26053	0	0	0.844973
lnc-PIDD-2:2	PIDD	-28.805	0.00150361	0.0331175	16.922	10.952	9.13672	0	0	1.68995
lnc-PIGB-1:5	PIGB	-329.02	0.000944641	0.0267866	5.2708	10.5139	1.79966	0	0	0
lnc-PIGN-7:1	PIGN	4.85581	0.0122537	0.0984856	8.22984	8.90762	8.99828	68.8418	12.2474	45.6285
lnc-PIK3AP1-6:1	PIK3AP1	135.74	8.36893e-06	0.00194303	0	0	1.52279	168.857	14.0845	26.1942
lnc-PIK3CD-1:1	PIK3CD	-9.46955	0.00102871	0.0281558	78.1372	56.9503	65.7567	6.75429	1.22474	13.5196
lnc-PIRT-3:1	PIRT	-187.533	0.00207336	0.0382463	3.32892	3.06656	3.59931	0	0	0
lnc-PITX1-4:1	PITX1	-9.18317	0.0010263	0.0281558	71.017	145.734	346.78	18.1846	19.5958	23.6592
lnc-PKDREJ-3:1	PKDREJ	-219.062	0.00152479	0.0331175	3.14398	4.67285	3.87618	0	0	0
lnc-PKNOX1-1:1	PKNOX1	-281.865	0.0015043	0.0331175	2.40422	1.16821	11.4901	0	0	0
lnc-PLCD3-3:2	PLCD3	-193.21	0.00618473	0.0690577	3.51386	5.40298	1.38435	0	0	0
lnc-PLD1-4:1	PLD1	-21.8752	0.0204922	0.12799	9.70936	11.098	2.3534	0.779342	0	0
lnc-PLEKHA7-2:1	PLEKHA7	-10.1786	0.0164261	0.113777	18.0317	14.1646	2.7687	2.85759	0	0
lnc-PLEKHA8-2:1	PLEKHA8	-61.7303	0.000520046	0.0195613	1.57199	13.7265	33.6397	0.519561	0	0
lnc-PLEKHA8-3:1	PLEKHA8	15.9526	0.00256727	0.0432135	5.45574	0	3.04557	87.0265	6.73605	43.0936
lnc-PLEKHF2-1:1	PLEKHF2	-19.0734	0.0166367	0.113777	3.79127	6.86325	1.24592	0	0	0.844973
lnc-PMP22-2:1	PMP22	-197.061	0.00608736	0.0687135	3.60633	2.1904	4.70679	0	0	0
lnc-POLR2B-14:1	POLR2B	-10.7597	0.0206011	0.128067	11.8362	8.32351	10.7979	0	0	3.37989
lnc-POLR2L-3:1	POLR2L	31.2711	0.000310091	0.0153864	2.49669	0	0.553741	64.9451	6.73605	27.0391
lnc-POTEF-6:10	POTEF	-278.348	0.00362071	0.0522018	3.05151	3.65066	8.16767	0	0	0
lnc-PPIAL4G-6:13	PPIAL4G	-18.1095	0.0123948	0.0987355	8.32231	12.4123	3.59931	0	0	1.68995
lnc-PPIC-1:1	PPIC	40.3234	0.00180844	0.035901	1.10964	0.146027	0	25.4585	10.4103	18.5894
lnc-PPM1K-1:1	PPM1K	-236.769	0.00131169	0.0308796	2.95904	5.25695	4.42992	0	0	0
lnc-PPP4R1-18:1	PPP4R1	6.13828	0.0313491	0.155774	4.80845	2.1904	0.692176	22.8607	3.67421	21.1243
lnc-PPYR1-3:1	PPYR1	-869.809	5.51181e-06	0.00148444	4.25362	18.2533	24.0877	0	0	0
lnc-PQLC3-1:2	PQLC3	16.3041	0.0106152	0.0922997	4.43856	0	1.66122	68.5821	0	32.109
lnc-PRAGMIN.1-1:2	PRAGMIN.1	-290.719	0.00124988	0.0301628	1.57199	2.48245	11.4901	0	0	0
lnc-PRDM13-1:6	PRDM13	-75.0797	0.000195877	0.0111987	14.1479	14.0185	5.95271	0.259781	0	0
lnc-PRDM14-5:1	PRDM14	12.1179	0.0138458	0.104262	3.60633	3.35861	0.692176	51.6963	3.67421	38.0238
lnc-PRKD1-7:2	PRKD1	-11.6197	0.0237476	0.136894	62.5098	16.647	3.46088	0	0	7.60476
lnc-PRL-13:1	PRL	41.6872	0.00137235	0.0314288	2.86657	0	0	81.3113	3.06184	39.7137
lnc-PROC-1:1	PROC	-19.342	0.0020394	0.0381373	24.4121	14.7487	14.8126	0	0	3.37989
lnc-PROK2-1:1	PROK2	22.4198	0.0353938	0.165032	0.924701	0	0	2.85759	12.2474	7.60476
lnc-PROKR2-2:4	PROKR2	-6.40091	0.00542993	0.0646366	41.9814	89.3682	36.9622	14.5477	1.22474	10.1397
lnc-PRPF40B-1:2	PRPF40B	-8.187	0.0145468	0.107517	14.3329	13.8725	4.98366	1.55868	0	2.53492
lnc-PRSS27-2:1	PRSS27	11.4747	0.000468805	0.0185674	5.91809	5.84106	12.736	199.511	24.4947	56.6132
lnc-PSMA5-1:1	PSMA5	19.8192	0.00317528	0.0490348	0	4.23477	0.969046	80.532	6.12368	16.0545
lnc-PSMC2-1:1	PSMC2	10.4545	0.000196264	0.0111987	8.22984	7.00927	17.7197	205.746	44.7028	93.792
lnc-PTCH1-1:2	PTCH1	33.885	0.0168158	0.114083	0	2.92053	0	66.7636	0	32.9539
lnc-PTGER3-7:2	PTGER3	-254.045	0.00334931	0.0507092	1.29458	1.89834	10.3826	0	0	0
lnc-PTGR2-1:4	PTGR2	11.7909	0.00180057	0.035901	1.20211	4.08874	10.5211	142.62	17.7587	25.3492
lnc-PTGR2-4:4	PTGR2	-5.75955	0.00595293	0.0679334	63.1571	23.6563	36.6853	3.37715	9.18552	9.2947
lnc-PTPRG-2:2	PTPRG	8.8603	0.0127308	0.0998249	7.95243	6.13311	9.13672	134.047	0	71.8227
lnc-PXDN-1:1	PXDN	-8.82732	0.0282008	0.147878	17.2919	7.1553	15.3663	0	0	5.06984
lnc-RAB19-3:1	RAB19	-6.19092	0.0311521	0.155253	18.5865	17.3772	8.02924	1.55868	0	5.91481
lnc-RAB28-5:1	RAB28	-187.122	0.004702	0.0592856	1.20211	6.71722	2.07653	0	0	0
lnc-RAB28-6:1	RAB28	-249.262	0.00263486	0.0434956	7.95243	3.94272	1.38435	0	0	0
lnc-RAB28-7:1	RAB28	-6.36958	0.00952647	0.0872677	54.7423	140.77	508.057	17.1455	47.1523	46.4735
lnc-RAB40C-1:1	RAB40C	12.3237	0.00307607	0.0482722	0.739761	1.02219	4.56836	59.4897	7.96078	10.1397
lnc-RAD9B-3:6	RAD9B	-711.475	3.32325e-05	0.00392551	12.6684	6.57119	18.8272	0	0	0
lnc-RAG2-2:1	RAG2	-11.496	0.000557022	0.0203828	24.4121	36.5066	34.055	4.15649	1.22474	2.53492
lnc-RANBP9-1:1	RANBP9	-17.5465	0.0182781	0.120387	3.42139	4.9649	2.49183	0	0	0.844973
lnc-RASD1-3:1	RASD1	-8.00125	0.014562	0.107517	21.4531	14.0185	13.7051	3.37715	0	2.53492
lnc-RASGEF1B-1:2	RASGEF1B	36.0813	0.00156343	0.0335194	1.10964	0	0	26.4976	10.4103	6.75978
lnc-RBMX-4:5	RBMX	-31.6495	0.0108228	0.0927112	5.17833	1.02219	7.61393	0.259781	0	0
lnc-RCAN1-3:1	RCAN1	-243.314	0.00148843	0.0331175	6.84279	3.21258	2.90714	0	0	0
lnc-RCHY1-7:1	RCHY1	-37.8836	6.10798e-05	0.00579226	30.3302	27.0149	22.7034	1.55868	0	0
lnc-RET-4:1	RET	-4.57885	0.0405843	0.178631	30.0528	15.9169	13.7051	2.59781	0	10.9846
lnc-RFC2-4:1	RFC2	13.5762	0.0310135	0.154792	3.79127	1.16821	0	53.7746	0	14.3645
lnc-RFC3-7:1	RFC3	-227.122	0.00118096	0.0293627	4.80845	1.89834	5.39897	0	0	0
lnc-RFX7-3:1	RFX7	-6.94468	0.00449685	0.0581138	51.136	74.4735	86.7988	17.9249	11.0226	0.844973
lnc-RGS12-1:1	RGS12	-9.93217	0.0446997	0.187412	6.1955	1.31424	6.22958	1.03912	0	0
lnc-RGS20-3:1	RGS20	-144.17	0.00563276	0.0657286	2.12681	2.92053	2.63027	0	0	0
lnc-RHOT1-1:1	RHOT1	-120.209	0.0119489	0.0977548	2.58916	1.02219	2.7687	0	0	0
lnc-RIMKLB-6:4	RIMKLB	-409.513	0.00108321	0.0288271	1.01717	2.48245	18.4119	0	0	0
lnc-RIPK1-1:2	RIPK1	-5.96289	0.0380314	0.171971	11.0039	13.2884	8.85985	2.85759	0	2.53492
lnc-RNASET2-4:1	RNASET2	-8.83114	0.0275344	0.146149	4.99339	26.2848	7.19863	0	3.67421	0.844973
lnc-RNF113A-2:1	RNF113A	-34.3689	0.00153803	0.0331573	23.3025	18.8374	16.6122	0.259781	0	1.68995
lnc-RNF139-1:1	RNF139	-159.173	0.00354967	0.0520455	4.71598	2.62848	1.10748	0	0	0
lnc-RNF32-1:1	RNF32	-5.36389	0.0397024	0.176098	4.53103	10.806	25.8874	1.03912	4.28657	2.53492
lnc-RNF38-1:2	RNF38	49.7119	0.000898251	0.0262953	1.57199	0	0	50.1376	21.4329	11.8296
lnc-ROCK1-1:1	ROCK1	-624.495	0.000271347	0.0142733	9.52442	9.49172	14.3973	0	0	0
lnc-RP1-239B22.1.1-3:1	RP1-239B22.1.1	-166.222	0.0133857	0.10237	3.23645	1.46027	4.15305	0	0	0
lnc-RP1-241P17.4.1-1:1	RP1-241P17.4.1	-207.663	0.00532614	0.0639232	5.73315	3.94272	1.38435	0	0	0
lnc-RP11-1000B6.4.1-1:2	RP11-1000B6.4.1	6.20093	0.0374548	0.170444	6.84279	0.730133	0.830611	39.7464	4.89894	7.60476
lnc-RP11-160N1.10.1-6:1	RP11-160N1.10.1	11.2761	0.00010409	0.00796405	13.778	4.3808	11.0748	157.427	47.1523	125.901
lnc-RP11-219B4.6.1-1:1	RP11-219B4.6.1	-152.734	0.0127029	0.0998249	2.68163	3.65066	1.79966	0	0	0
lnc-RP11-262H14.4.1-15:1	RP11-262H14.4.1	-4.10989	0.0236765	0.136844	19.5112	29.7894	35.0241	5.71517	4.89894	10.1397
lnc-RP11-322L20.1.1-8:1	RP11-322L20.1.1	-29.0285	0.00222856	0.0396956	6.47291	9.49172	22.0112	0	0	1.68995
lnc-RP11-324D17.2.1-4:1	RP11-324D17.2.1	-6.17161	0.0427222	0.183635	16.7371	11.5361	4.15305	1.2989	0	4.22487
lnc-RP11-345P4.5.1-1:2	RP11-345P4.5.1	-231.801	0.00133183	0.0311221	3.23645	5.40298	3.73775	0	0	0
lnc-RP11-383H13.1.1-3:1	RP11-383H13.1.1	46.682	0.000382399	0.016778	0.0924701	0	1.24592	22.6009	20.2081	21.1243
lnc-RP11-389E17.1.1-6:1	RP11-389E17.1.1	-7.11413	0.0152342	0.109807	16.4597	16.2089	18.8272	1.03912	0	6.75978
lnc-RP11-454H13.5.1-2:1	RP11-454H13.5.1	-9.58393	0.0133906	0.10237	15.9049	8.76159	8.30611	0	0.612368	3.37989
lnc-RP11-537P22.1.1-1:3	RP11-537P22.1.1	-6.3508	0.0139023	0.104262	26.7239	9.05364	12.5976	4.41627	1.8371	0.844973
lnc-RP11-664D7.4.1-2:1	RP11-664D7.4.1	-13.2165	0.00996826	0.0893073	11.8362	10.5139	4.56836	0	0	2.53492
lnc-RP11-664D7.4.1-6:1	RP11-664D7.4.1	-5.03378	0.0320406	0.157844	12.1136	30.0815	41.9458	1.55868	5.51131	10.1397
lnc-RP11-701P16.2.1-1:1	RP11-701P16.2.1	-382.158	0.000264855	0.014092	8.50725	8.03146	3.87618	0	0	0
lnc-RP11-863N1.2.1-5:2	RP11-863N1.2.1	9.17017	0.010845	0.0927112	10.0792	2.1904	0.969046	83.9091	4.28657	33.7989
lnc-RP11-944C7.1.1-9:1	RP11-944C7.1.1	-315.789	0.000976062	0.0271613	12.8533	1.75232	2.21496	0	0	0
lnc-RP3-377D14.1.1-21:1	RP3-377D14.1.1	-13.9906	0.0268858	0.144471	4.16115	2.33642	2.07653	0	0	0.844973
lnc-RP3-486B10.1.1-4:2	RP3-486B10.1.1	8.33927	0.0489556	0.19667	15.9049	0	1.79966	102.613	0	45.6285
lnc-RPRML-3:18	RPRML	83.1367	0.000133635	0.0091813	0	0	1.52279	75.5961	14.0845	38.8688
lnc-RPRML-6:1	RPRML	-3.64956	0.0484512	0.195581	32.5495	16.9391	28.3792	6.49451	2.44947	12.6746
lnc-RPS12-4:1	RPS12	-9.30148	0.0187051	0.121956	13.5006	10.0758	2.07653	0.519561	0	2.53492
lnc-RPS6KA2-2:1	RPS6KA2	-10.9082	0.00551908	0.0648515	14.9802	5.69503	24.503	1.03912	0	3.37989
lnc-RPS6KL1-1:2	RPS6KL1	-5.5843	0.0499833	0.198547	13.4082	11.8281	13.1513	3.37715	0	3.37989
lnc-RRP36-1:1	RRP36	-9.83157	0.0152014	0.109701	13.0383	12.1202	18.5503	0	0	5.06984
lnc-RSAD2-2:1	RSAD2	19.0982	0.0100328	0.0894717	0.739761	2.1904	0	34.5508	0	21.9693
lnc-RTP4-4:1	RTP4	-7.40285	0.00112428	0.0288924	74.4384	103.095	277.286	19.2238	15.3092	27.0391
lnc-RUFY4-1:3	RUFY4	-23.3138	0.00496889	0.0618402	4.25362	8.76159	5.53741	0.519561	0	0
lnc-RWDD3-4:1	RWDD3	-21.5577	0.0131786	0.101639	4.71598	2.62848	2.21496	0.259781	0	0
lnc-RWDD4-2:1	RWDD4	86.8951	8.75449e-06	0.0019648	0	0.730133	0.415305	72.7385	6.73605	20.2794
lnc-SALL1-7:1	SALL1	85.4532	0.000946861	0.0267866	0.739761	0	0	46.7605	2.44947	21.9693
lnc-SAMD4A-3:1	SAMD4A	7.21683	0.00292495	0.0466675	10.9115	10.952	9.13672	139.762	15.3092	68.4428
lnc-SCAPER-7:1	SCAPER	-306.445	0.00776239	0.0784991	1.75693	7.00927	7.61393	0	0	0
lnc-SCEL-6:1	SCEL	12.6002	0.0240366	0.137479	4.99339	0	1.93809	63.6462	0	24.5042
lnc-SCRIB-3:1	SCRIB	-5.22488	0.0450444	0.188103	18.679	18.1073	24.2261	1.2989	0	10.9846
lnc-SEC11A-1:3	SEC11A	-127.226	0.0082273	0.0814203	2.7741	2.04437	1.93809	0	0	0
lnc-SEC23B-2:1	SEC23B	-218.373	0.00197832	0.0374159	4.62351	4.52682	2.49183	0	0	0
lnc-SEC24A-2:1	SEC24A	48.7081	0.00102321	0.0281558	3.97621	0	0	162.103	9.79788	27.0391
lnc-SEPT5-1:3	43348	19.1882	2.56863e-05	0.00320271	4.06868	2.62848	2.07653	107.549	24.4947	37.1788
lnc-SEPT7-3:2	43350	-23.619	0.00258073	0.0433318	16.922	3.35861	12.3207	0.519561	0	0.844973
lnc-SEPT7-4:1	43350	-5.49068	0.0124208	0.0987355	18.2166	40.3033	80.1539	11.4303	9.18552	4.22487
lnc-SERGEF-2:4	SERGEF	13.0015	0.00825177	0.0814203	3.97621	0.43808	3.59931	41.0453	0	64.218
lnc-SERPINB1-1:7	SERPINB1	-5.05325	0.0274777	0.146135	8.22984	23.5103	19.7962	5.19561	3.67421	0.844973
lnc-SERPINI1-20:1	SERPINI1	-9.17291	0.0378713	0.171709	10.0792	5.40298	3.73775	0	0	2.53492
lnc-SETBP1-7:1	SETBP1	-26.1909	9.47614e-05	0.00749576	22.8401	27.745	20.4884	1.03912	0	1.68995
lnc-SETD6-16:1	SETD6	-7.57639	0.0446677	0.187412	3.6988	14.6027	17.9966	2.85759	0	1.68995
lnc-SFMBT1-5:3	SFMBT1	49.7778	1.82894e-06	0.000702931	2.49669	2.7745	1.10748	213.54	20.2081	86.1872
lnc-SGOL2-1:2	SGOL2	143.604	9.57427e-05	0.00749576	0	0.730133	0	90.4036	4.28657	12.6746
lnc-SGPP2-1:1	SGPP2	-150.232	0.011622	0.0961282	1.8494	1.16821	4.98366	0	0	0
lnc-SH2D4B-2:1	SH2D4B	8.26744	0.0407425	0.178943	0.554821	0.584106	0.27687	8.0532	1.22474	2.53492
lnc-SH3D19-1:5	SH3D19	-140.747	0.020625	0.128067	1.10964	3.06656	3.32244	0	0	0
lnc-SH3GLB2-1:1	SH3GLB2	-3.51258	0.0285752	0.148799	157.569	84.1113	52.4669	38.7073	11.0226	33.7989
lnc-SHC3-4:1	SHC3	-10.2701	0.00731763	0.0765056	25.4293	16.9391	11.3517	1.2989	0	4.22487
lnc-SHF-2:1	SHF	-15.1984	0.00333133	0.0506316	21.7305	10.5139	8.99828	1.03912	0	1.68995
lnc-SHISA8-1:1	SHISA8	7.89421	0.0187269	0.121956	6.10303	5.69503	0.553741	69.1016	0.612368	27.8841
lnc-SIRT4-5:1	SIRT4	24.1135	5.09116e-05	0.00511623	2.40422	2.62848	0.830611	85.4678	21.4329	35.4889
lnc-SLC16A3-2:1	SLC16A3	-25.2334	0.00979053	0.0884638	6.47291	1.31424	8.02924	0	0	0.844973
lnc-SLC16A7-1:1	SLC16A7	-358.568	0.00243939	0.0422221	3.23645	2.92053	13.0129	0	0	0
lnc-SLC22A18AS-1:1	SLC22A18AS	13.0295	5.6069e-05	0.00555166	11.7437	5.11093	11.9054	228.867	75.9336	70.1328
lnc-SLC22A7-1:1	SLC22A7	-8.07869	0.000300084	0.0151914	189.471	153.036	157.539	16.3662	19.5958	26.1942
lnc-SLC25A2-1:4	SLC25A2	-8.42319	0.0167858	0.114083	13.5006	5.25695	5.95271	2.33802	0	0
lnc-SLC25A21-4:1	SLC25A21	39.5109	0.00185511	0.0363094	0.739761	2.1904	0	70.1407	16.5339	30.419
lnc-SLC25A27-2:2	SLC25A27	-8.18607	0.00117383	0.0293627	44.7555	42.9318	87.6294	12.989	4.28657	3.37989
lnc-SLC25A29-1:2	SLC25A29	-165.898	0.0115449	0.0961282	1.29458	1.46027	6.09115	0	0	0
lnc-SLC25A32-7:2	SLC25A32	-18.8209	0.00206759	0.0382463	4.25362	14.1646	20.4884	1.55868	0	0
lnc-SLC29A4-5:2	SLC29A4	-156.389	0.0108321	0.0927112	1.29458	2.33642	4.70679	0	0	0
lnc-SLC35G4-5:1	SLC35G4	-30.2414	0.00594704	0.0679334	6.65785	2.1904	23.9493	0.779342	0	0
lnc-SLC47A1-3:1	SLC47A1	-5.116	0.0355564	0.165561	16.1823	8.46954	4.98366	1.2989	0.612368	4.22487
lnc-SLC7A7-2:1	SLC7A7	-7.1646	0.0122673	0.0984856	20.251	9.05364	29.6251	3.89671	0	4.22487
lnc-SLITRK1-8:1	SLITRK1	-21.1899	0.002683	0.0441678	10.0792	8.61556	5.39897	0.779342	0	0
lnc-SMC1B-7:1	SMC1B	-21.1093	0.0161555	0.11302	1.10964	6.86325	1.38435	0.259781	0	0
lnc-SMNDC1-1:1	SMNDC1	26.3891	0.000393308	0.0170528	1.94187	2.7745	0.138435	75.3364	9.18552	44.7836
lnc-SMYD3-5:1	SMYD3	-11.4929	0.00514205	0.0624935	15.6274	20.1517	13.2898	2.33802	0	1.68995
lnc-SNAPC5-6:1	SNAPC5	-18.0914	0.000583866	0.0204478	37.7278	26.7229	10.1058	1.03912	0	3.37989
lnc-SNRPE-4:1	SNRPE	23.6214	0.00171798	0.0352042	6.1955	0	0.27687	94.0405	6.73605	54.9232
lnc-SNX11-11:1	SNX11	-9.46128	0.00767252	0.0782713	19.5112	17.6692	12.1823	1.2989	0	4.22487
lnc-SNX29P2-5:1	SNX29P2	-6.17702	0.0163461	0.113462	52.8004	52.1315	27.1333	5.71517	0	16.0545
lnc-SOX1-6:1	SOX1	-343.501	0.000431256	0.0177051	6.84279	8.32351	3.18401	0	0	0
lnc-SOX11-6:1	SOX11	-5.42418	0.00891131	0.0842713	32.2721	80.0225	52.3285	10.9108	14.0845	5.06984
lnc-SP6-1:1	SP6	-224.28	0.00171843	0.0352042	4.43856	6.27914	1.24592	0	0	0
lnc-SPAG6-3:1	SPAG6	-15.0581	0.0428414	0.183727	3.51386	0	23.3955	0.259781	0	1.68995
lnc-SPATA12-2:1	SPATA12	22.5344	0.00247678	0.0426501	13.2232	0.43808	0	239.258	11.0226	59.9931
lnc-SPATA21-1:1	SPATA21	-6.44963	0.0385816	0.173527	25.7992	1.75232	4.42992	3.63693	0	0.844973
lnc-SPATA21-2:2	SPATA21	-118.217	0.0133413	0.102308	1.8494	2.7745	1.66122	0	0	0
lnc-SPDYC-2:1	SPDYC	-3.27534	0.0399579	0.176762	157.569	90.9745	82.5073	34.5508	11.0226	55.7682
lnc-SPG21-1:1	SPG21	7.06757	0.0451801	0.188358	2.7741	3.94272	2.90714	22.8607	31.8431	13.5196
lnc-SPINT1-1:1	SPINT1	-1213.73	1.215e-06	0.000593033	24.6895	21.3199	18.9656	0	0	0
lnc-SPON2-1:12	SPON2	-6.2674	0.0139241	0.104284	114.016	87.6159	79.0465	11.4303	0	33.7989
lnc-SPOPL-10:1	SPOPL	-6.15437	0.0189974	0.122123	15.4425	24.0944	35.7163	1.2989	0.612368	10.9846
lnc-SPRED2-16:1	SPRED2	-5.48627	0.0198528	0.125511	38.0977	70.9689	110.333	25.7183	13.4721	0
lnc-SPRY1-1:5	SPRY1	36.0522	0.00679091	0.073392	1.38705	0	0	31.4334	0	21.9693
lnc-SRBD1-3:1	SRBD1	-345.09	0.000875862	0.0260937	3.42139	1.46027	13.5666	0	0	0
lnc-SRD5A1-2:1	SRD5A1	-11.0088	0.0241853	0.13749	9.61689	7.44735	4.84523	1.55868	0	0
lnc-SRPK2-1:1	SRPK2	44.3246	0.00281015	0.0457023	0.647291	0	0	17.9249	5.51131	9.2947
lnc-SRPRB-1:1	SRPRB	-25.7193	0.0189171	0.122123	2.49669	7.00927	1.66122	0.259781	0	0
lnc-SRRM1-2:1	SRRM1	-192.807	0.00231561	0.0407271	2.40422	5.25695	2.63027	0	0	0
lnc-SRRM5-2:1	SRRM5	-16.039	0.0302483	0.152949	2.49669	2.33642	2.21496	0.259781	0	0
lnc-SRSF7-2:1	SRSF7	-10.9817	0.000923271	0.0265255	87.2918	40.5954	40.0078	3.37715	0.612368	11.8296
lnc-SSH1-1:1	SSH1	-18.9674	0.0159978	0.112267	4.90092	1.75232	5.1221	0	0	0.844973
lnc-SSH3-4:1	SSH3	-136.698	0.0129465	0.10054	3.23645	2.92053	1.10748	0	0	0
lnc-SSTR2-5:1	SSTR2	-29.2657	0.000704626	0.0231412	27.926	7.30133	13.5666	0.259781	0	1.68995
lnc-SSTR4-12:1	SSTR4	-21.6603	0.044729	0.187412	3.51386	1.60629	4.01462	0.259781	0	0
lnc-ST3GAL2-1:1	ST3GAL2	12.6447	0.036188	0.166772	2.31175	0	0	20.2629	4.89894	5.06984
lnc-ST6GAL2-8:1	ST6GAL2	-5.41051	0.00730094	0.0764498	55.1122	109.958	145.357	22.8607	30.6184	3.37989
lnc-ST7L-5:3	ST7L	-454.074	0.000159023	0.0104971	12.2061	5.40298	6.64489	0	0	0
lnc-ST8SIA1-6:1	ST8SIA1	-191.687	0.00595719	0.0679334	1.47952	5.98709	2.7687	0	0	0
lnc-ST8SIA4-10:2	ST8SIA4	-8.38144	0.00147465	0.0330961	212.311	505.252	1046.43	55.3333	64.911	90.4121
lnc-ST8SIA4-7:1	ST8SIA4	-5.65804	0.0122955	0.0984856	39.3923	97.1076	140.235	4.67605	17.7587	27.0391
lnc-ST8SIA4-8:1	ST8SIA4	-13.5208	0.00347604	0.0518226	3.60633	27.0149	40.2846	1.2989	0	4.22487
lnc-STAC-2:1	STAC	18.6666	0.000930354	0.0265427	0.647291	0.730133	1.24592	10.1314	12.8597	27.0391
lnc-STARD7-1:1	STARD7	-369.958	0.00164713	0.0344414	6.56538	9.05364	4.15305	0	0	0
lnc-STAT1-2:3	STAT1	-94.3939	4.97121e-05	0.00511623	27.2787	9.63775	19.3809	0	0	0.844973
lnc-STIL-5:1	STIL	-6.72051	0.00275402	0.0449923	87.6617	45.5603	58.4196	3.63693	18.371	6.75978
lnc-STX17-4:1	STX17	-6.04911	0.0354601	0.165227	10.4491	12.1202	11.0748	2.85759	0	2.53492
lnc-STYX-4:1	STYX	19.7831	0.00944973	0.0870299	1.75693	0	0.415305	22.6009	8.57315	13.5196
lnc-STYXL1-4:1	STYXL1	-105.353	0.022402	0.133199	2.86657	1.60629	1.10748	0	0	0
lnc-SUMF1-3:1	SUMF1	-5.82031	0.0208608	0.12827	27.8335	15.1868	24.7799	2.07824	0	10.1397
lnc-SV2B-1:3	SV2B	-6.72635	0.0252123	0.140177	9.06207	8.46954	8.58298	2.59781	0	0.844973
lnc-SV2C-3:1	SV2C	-15.4731	0.0124377	0.0987536	16.2747	2.1904	1.79966	0	0	1.68995
lnc-SYF2-4:2	SYF2	-266.679	0.00481216	0.0604372	1.57199	9.63775	3.04557	0	0	0
lnc-SYNPO2-1:3	SYNPO2	-24.1632	0.000381689	0.016778	12.8533	25.5546	15.92	0.259781	0.612368	1.68995
lnc-TACC2-3:3	TACC2	-30.2178	0.000253133	0.0136347	17.107	24.9705	5.39897	0.259781	0.612368	0.844973
lnc-TADA2B-5:1	TADA2B	15.4044	1.73497e-05	0.00243366	6.01056	7.1553	5.81428	153.271	44.7028	94.637
lnc-TBC1D2B-7:2	TBC1D2B	41.2854	0.00152303	0.0331175	1.66446	0	0	57.1517	3.06184	12.6746
lnc-TBC1D7-2:1	TBC1D7	-165.263	0.00583596	0.0673108	4.90092	2.7745	1.10748	0	0	0
lnc-TBX6-1:1	TBX6	14.3286	0.0225347	0.133389	0.832231	2.1904	0	16.1064	25.1071	2.53492
lnc-TCP10L-2:1	TCP10L	-201.584	0.00169636	0.0350356	2.49669	4.52682	3.73775	0	0	0
lnc-TEKT1-2:1	TEKT1	-14.9929	0.0299497	0.152457	4.16115	2.04437	3.18401	0	0	0.844973
lnc-TEPP-1:1	TEPP	-153.022	0.0111394	0.0942229	2.95904	1.16821	4.01462	0	0	0
lnc-TFAP2C-2:2	TFAP2C	-288.925	0.000891206	0.0262953	5.54821	6.27914	3.59931	0	0	0
lnc-TFAP2E-7:1	TFAP2E	-5.63553	0.0415932	0.180443	7.85996	6.27914	4.42992	2.07824	0	0.844973
lnc-TFAP4-3:1	TFAP4	8.48645	0.00882584	0.0841705	5.17833	8.76159	2.07653	105.731	3.67421	26.1942
lnc-TFDP2-5:1	TFDP2	-32.8494	0.00929805	0.0865828	10.819	9.49172	4.70679	0.519561	0	0
lnc-TFEC-7:1	TFEC	7.41825	0.00357342	0.0520455	12.0211	5.69503	15.6432	177.95	15.9216	53.2333
lnc-TGDS-1:3	TGDS	13.953	0.00465994	0.0590784	1.10964	1.16821	3.32244	49.6181	0	28.7291
lnc-TGFB3-6:1	TGFB3	83.1534	2.60077e-06	0.000842232	1.47952	0	0.415305	97.4177	9.79788	59.9931
lnc-TGFBRAP1-13:1	TGFBRAP1	-7.64534	0.0132454	0.101805	52.3381	27.453	16.3353	0	5.51131	7.60476
lnc-TIMM9-3:1	TIMM9	-3.9977	0.0130505	0.101115	92.1927	158.147	193.394	48.0594	37.9668	24.5042
lnc-TJP2-1:1	TJP2	13.6788	0.00028016	0.0146226	12.391	3.35861	1.79966	144.178	22.0452	75.2026
lnc-TJP3-1:1	TJP3	-333.429	0.000420521	0.0173703	10.819	3.35861	3.59931	0	0	0
lnc-TKT-1:10	TKT	-12.8529	0.0484633	0.195581	5.54821	4.9649	7.61393	0	0	1.68995
lnc-TLX1-6:1	TLX1	6.47596	0.0052637	0.0637419	22.2853	6.27914	5.26053	95.859	18.371	105.622
lnc-TM2D3-3:1	TM2D3	-9.3446	0.0125431	0.099014	12.391	8.32351	14.2588	1.2989	0	2.53492
lnc-TM9SF2-8:1	TM9SF2	3.2099	0.0368612	0.16881	27.4636	34.9003	47.7601	59.7495	143.906	150.405
lnc-TMEM111-1:8	TMEM111	-5.621	0.0289916	0.150015	31.6248	19.4215	15.92	1.55868	0	10.9846
lnc-TMEM135-8:3	TMEM135	-181.96	0.00368118	0.0525114	5.82562	2.04437	1.79966	0	0	0
lnc-TMEM177-4:1	TMEM177	19.1024	0.0217871	0.131445	0	0	2.7687	18.7042	6.12368	28.7291
lnc-TMEM215-2:1	TMEM215	-25.1365	0.0412729	0.17979	1.01717	6.71722	9.69046	0	0	0.844973
lnc-TMEM45B-2:1	TMEM45B	-43.6062	0.00153408	0.0331573	9.06207	4.67285	13.0129	0	0	0.844973
lnc-TMEM74B-2:1	TMEM74B	11.9293	0.0283705	0.148422	1.10964	1.75232	0	15.3271	0	19.4344
lnc-TMLHE-5:1	TMLHE	-331.289	0.00172021	0.0352042	4.06868	6.71722	6.92176	0	0	0
lnc-TMPRSS2-7:1	TMPRSS2	-7.23651	0.00444195	0.0579137	44.1082	19.2755	31.0095	7.27385	4.28657	0.844973
lnc-TMUB2-1:4	TMUB2	13.185	0.024769	0.138975	1.66446	0.292053	0	15.0673	0	11.8296
lnc-TNFAIP8L3-1:1	TNFAIP8L3	-21.2265	0.0458841	0.189765	2.86657	1.31424	11.3517	0.519561	0	0
lnc-TNFRSF17-2:2	TNFRSF17	-4.84162	0.0443362	0.18696	32.9194	15.4788	14.3973	4.67605	0	8.44973
lnc-TPO-11:1	TPO	39.1407	4.15081e-05	0.00450765	1.20211	2.04437	0.138435	72.9983	7.96078	53.2333
lnc-TPTE-2:1	TPTE	-8.37632	0.0307204	0.153974	3.97621	10.6599	5.39897	0.779342	0	1.68995
lnc-TRAFD1-4:1	TRAFD1	12.7701	0.0123079	0.0984856	1.29458	0.292053	1.66122	4.15649	12.2474	26.1942
lnc-TRAK1-1:1	TRAK1	4.78911	0.0302859	0.152949	3.51386	6.57119	12.736	78.1939	20.2081	10.1397
lnc-TRAK1-5:1	TRAK1	-329.357	0.00143781	0.0324858	11.9286	4.52682	1.10748	0	0	0
lnc-TRBV25OR9-2-2:1	TRBV25OR9-2	17.5747	0.00482025	0.0604372	4.53103	0.146027	3.32244	65.9843	0	76.0476
lnc-TREM2-1:1	TREM2	-325.95	0.00251721	0.0428147	4.99339	7.30133	5.1221	0	0	0
lnc-TRIM13-7:1	TRIM13	-13.2003	0.02668	0.14409	7.85996	1.75232	17.0275	1.03912	0	0.844973
lnc-TRIM26-2:11	TRIM26	20.4834	0.00444007	0.0579137	2.58916	0	2.21496	57.9311	18.9834	22.8143
lnc-TRIM60-3:1	TRIM60	-22.9834	0.0286267	0.148952	5.45574	5.54901	4.29149	0	0	0.844973
lnc-TRIM62-3:1	TRIM62	-5.08146	0.0385174	0.17347	11.8362	19.4215	11.4901	1.2989	5.51131	1.68995
lnc-TRIM66-1:1	TRIM66	-47.0996	0.00184355	0.0361884	6.01056	14.4566	8.85985	0	0	0.844973
lnc-TRIM69-2:7	TRIM69	-3.65784	0.0471886	0.193614	159.973	743.859	685.254	57.9311	153.092	223.918
lnc-TRMT61B-5:1	TRMT61B	-657.01	1.27469e-05	0.00214562	11.7437	13.5805	9.82889	0	0	0
lnc-TRPT1-3:1	TRPT1	-12.9056	0.0149781	0.109187	17.9392	8.32351	3.18401	1.81846	0	0
lnc-TSSK3-2:2	TSSK3	-6.53634	0.0196454	0.124433	23.7648	21.904	54.6819	0.519561	1.22474	14.3645
lnc-TTC26-5:1	TTC26	-8.20513	0.00456046	0.0584868	44.6631	47.4586	17.9966	3.11737	0.612368	10.1397
lnc-TTLL7-2:10	TTLL7	-8.14264	0.017852	0.118365	5.36327	18.2533	16.8891	2.33802	0	2.53492
lnc-TTR-1:2	TTR	40.5438	7.38161e-05	0.00680827	15.1651	2.1904	0.138435	418.247	69.8099	226.453
lnc-TUBB2B-8:4	TUBB2B	-8.1807	0.00893664	0.0842713	13.1308	10.5139	17.8581	1.03912	2.44947	1.68995
lnc-TUBGCP6-5:1	TUBGCP6	-111.782	0.00618235	0.0690577	2.40422	1.16821	2.3534	0	0	0
lnc-TXNDC15-1:1	TXNDC15	-11.4942	0.000219283	0.0121	71.8493	104.555	463.619	17.9249	23.27	14.3645
lnc-TYMS-1:1	TYMS	-17.2628	0.0316583	0.156847	5.36327	2.92053	1.79966	0	0.612368	0
lnc-UBE3A-3:2	UBE3A	12.6969	0.0410152	0.179555	2.40422	0	0	18.964	0	12.6746
lnc-UBLCP1-5:3	UBLCP1	-1953.88	3.73868e-08	8.39084e-05	42.3513	20.8818	41.3921	0	0	0
lnc-UBXN4-11:1	UBXN4	-323.169	0.00122678	0.0298191	1.66446	7.59338	8.02924	0	0	0
lnc-UNC50-1:2	UNC50	25.9975	0.0037817	0.0532682	0	0	4.29149	83.1298	13.4721	15.2095
lnc-UPP2-2:2	UPP2	10.4605	0.037964	0.171782	0	6.71722	1.79966	71.9592	0	16.8995
lnc-UPRT-2:1	UPRT	-5.47511	0.0172038	0.115653	12.7609	27.8911	46.7911	4.93583	6.73605	4.22487
lnc-UQCRFS1-8:1	UQCRFS1	-10.1916	0.0115265	0.0961282	8.13737	19.7136	11.3517	0.779342	0	3.37989
lnc-URB2-1:2	URB2	-92.0197	0.0127072	0.0998249	2.58916	1.02219	1.24592	0	0	0
lnc-UROD-2:1	UROD	-6.1716	0.0394574	0.175726	5.08586	9.63775	14.8126	1.03912	0.612368	3.37989
lnc-USP11-1:1	USP11	-10.7243	0.0013451	0.0311221	25.6142	21.0278	10.5211	2.33802	1.8371	0.844973
lnc-USP13-5:1	USP13	-26.4584	0.0105104	0.0920109	4.80845	4.3808	2.49183	0.259781	0	0
lnc-USP14-5:8	USP14	-13.6742	0.00551092	0.0648515	5.73315	4.67285	5.39897	0.779342	0	0
lnc-USP20-6:1	USP20	-37.3524	0.0092454	0.0862178	3.42139	4.52682	8.30611	0.259781	0	0
lnc-USP40-1:2	USP40	-309.62	0.00388984	0.0542242	3.05151	3.94272	9.55202	0	0	0
lnc-USP6-3:1	USP6	-18.8052	0.0321898	0.158315	2.12681	4.08874	1.93809	0.259781	0	0
lnc-UTP15-1:1	UTP15	-9.60239	0.0299336	0.152457	1.10964	6.13311	19.2425	0	0.612368	2.53492
lnc-UTS2-5:1	UTS2	206.241	1.40912e-05	0.00220641	0	0	1.10748	170.156	10.4103	53.2333
lnc-VASH2-1:1	VASH2	-283.759	0.00347896	0.0518226	7.76749	5.98709	1.38435	0	0	0
lnc-VASP-1:1	VASP	-15.2207	0.0358111	0.166025	4.06868	1.46027	1.10748	0.259781	0	0
lnc-VDAC3-1:1	VDAC3	20.2372	0.000124173	0.00870894	5.82562	4.08874	0.969046	148.075	9.18552	64.218
lnc-VMP1-4:1	VMP1	-12.8899	0.0444005	0.18696	0.554821	4.23477	13.2898	0	0	1.68995
lnc-VPS37C-3:2	VPS37C	-7.71432	0.00529819	0.0638277	27.5561	12.7043	25.6105	1.2989	4.89894	2.53492
lnc-VPS54-3:1	VPS54	-125.147	0.00952222	0.0872677	2.95904	1.60629	2.07653	0	0	0
lnc-VSTM2B-15:1	VSTM2B	-172.997	0.00275981	0.0449923	4.62351	2.7745	1.79966	0	0	0
lnc-VSX1-4:1	VSX1	-7.21911	0.00772854	0.0784861	20.8982	21.7579	14.6741	3.63693	0	4.22487
lnc-WDHD1-2:1	WDHD1	-6.90721	0.0412777	0.17979	7.67502	5.54901	25.0568	2.85759	0	2.53492
lnc-WDR16-3:1	WDR16	-10.8043	0.0246992	0.138817	7.76749	6.86325	3.87618	0.779342	0	0.844973
lnc-WDR27-2:1	WDR27	-36.8285	0.000445908	0.0178708	12.0211	13.1424	12.0439	0.259781	0	0.844973
lnc-WDR31-1:1	WDR31	-45.3304	0.0240669	0.137479	6.38044	11.244	1.24592	0.259781	0	0
lnc-WDR5-7:1	WDR5	8.43625	0.00485901	0.0608099	28.8507	2.48245	5.81428	212.5	15.3092	86.1872
lnc-WDR60-11:1	WDR60	-173.217	0.00425433	0.0564882	2.58916	2.62848	4.01462	0	0	0
lnc-WDR73-7:8	WDR73	15.025	0.0471505	0.193576	1.57199	0	0	5.71517	0	19.4344
lnc-WI2-3658N16.1.1-3:1	WI2-3658N16.1.1	-5.99867	0.0344173	0.162619	17.3844	11.098	14.1204	4.93583	0	1.68995
lnc-WRB-5:1	WRB	-467.074	0.000517312	0.0195613	8.78466	5.11093	11.0748	0	0	0
lnc-WRNIP1-34:1	WRNIP1	-4.0641	0.0395785	0.1759	14.3329	35.3384	27.9639	10.651	6.12368	1.68995
lnc-WSB2-5:1	WSB2	-34.1649	0.000592205	0.0204478	23.0251	10.6599	9.55202	0	0	1.68995
lnc-WWOX-4:1	WWOX	15.7208	0.00100976	0.0279782	0.832231	0.730133	7.8908	89.1047	17.1463	42.2487
lnc-XAGE1A-5:1	XAGE1A	-3.74213	0.0236144	0.13683	67.8731	124.707	134.697	30.1345	43.4781	13.5196
lnc-XIAP-12:1	XIAP	-15.5224	0.00716727	0.0756383	14.7027	9.63775	7.33706	1.03912	0	0.844973
lnc-XIRP2-2:1	XIRP2	-6.51323	0.0489887	0.196685	11.0964	12.4123	12.8745	0	4.89894	0.844973
lnc-XRCC1-2:1	XRCC1	-14.7056	0.00409719	0.0559108	9.15454	9.19967	7.06019	0.779342	0	0.844973
lnc-YLPM1-4:6	YLPM1	-20.7668	0.0350109	0.163928	5.17833	4.52682	4.15305	0	0	0.844973
lnc-ZBED5-5:3	ZBED5	-711.974	0.000265808	0.014092	5.73315	23.8023	8.58298	0	0	0
lnc-ZC3H12A-1:1	ZC3H12A	-6.21551	0.0207975	0.128115	12.8533	45.9983	23.9493	5.71517	0	7.60476
lnc-ZC3H12B-16:1	ZC3H12B	-22.1987	0.039488	0.175726	3.97621	7.1553	2.21496	0	0.612368	0
lnc-ZCCHC24-9:1	ZCCHC24	-56.7103	0.000708017	0.0231412	5.64068	8.61556	11.3517	0.259781	0	0
lnc-ZDHHC7-2:1	ZDHHC7	11.5186	0.00180857	0.035901	3.97621	5.69503	0.692176	83.6493	12.8597	22.8143
lnc-ZGLP1-2:1	ZGLP1	-170.617	0.00187494	0.0364868	4.62351	2.92053	1.52279	0	0	0
lnc-ZMYM3-4:1	ZMYM3	-247.314	0.00178304	0.0357767	1.10964	6.71722	5.39897	0	0	0
lnc-ZNF100-8:1	ZNF100	-31.027	0.00424752	0.0564882	3.42139	9.63775	6.09115	0	0	0.844973
lnc-ZNF146-1:8	ZNF146	-174.554	0.00233459	0.0409344	4.99339	2.48245	1.79966	0	0	0
lnc-ZNF207-1:1	ZNF207	-23.8351	0.0116378	0.0961282	5.08586	8.46954	4.84523	0.519561	0	0
lnc-ZNF238-7:1	ZNF238	-22.6856	0.0195249	0.123822	7.76749	4.3808	2.49183	0	0	0.844973
lnc-ZNF273-1:6	ZNF273	-389.215	0.00322517	0.0494649	1.10964	3.65066	16.0585	0	0	0
lnc-ZNF367-1:1	ZNF367	-6.48415	0.0299431	0.152457	13.5931	7.00927	21.8728	3.11737	3.06184	0
lnc-ZNF385C-6:1	ZNF385C	-198.408	0.00817855	0.0814203	6.84279	2.1904	1.52279	0	0	0
lnc-ZNF423-5:1	ZNF423	-8.22662	0.01063	0.0922997	46.9748	15.7709	12.736	3.37715	0	5.91481
lnc-ZNF486-7:1	ZNF486	-4.88872	0.0282262	0.147896	28.0184	23.0722	19.3809	5.45539	0.612368	8.44973
lnc-ZNF510-2:1	ZNF510	-201.727	0.00121734	0.0296968	4.06868	3.35861	3.32244	0	0	0
lnc-ZNF514-2:1	ZNF514	-24.0488	0.0332375	0.160571	1.8494	3.65066	10.7979	0	0	0.844973
lnc-ZNF541-4:1	ZNF541	-7.86945	0.00770548	0.0784861	68.7053	35.9225	52.4669	3.63693	0	16.8995
lnc-ZNF546-3:3	ZNF546	-67.2555	0.000515224	0.0195613	10.9115	15.9169	3.46088	0.259781	0	0
lnc-ZNF584-1:1	ZNF584	-16.1597	0.00284425	0.0459369	20.251	3.79669	14.3973	0.779342	0	1.68995
lnc-ZNF585B-5:1	ZNF585B	-17.6947	0.00460786	0.0588156	24.1347	1.75232	24.503	0	0	3.37989
lnc-ZNF611-1:1	ZNF611	-119.88	0.00765897	0.0782516	1.47952	3.79669	1.10748	0	0	0
lnc-ZNF644-1:1	ZNF644	10.2281	0.0349459	0.163899	0.36988	0	1.52279	9.61188	0	10.1397
lnc-ZNF696-1:1	ZNF696	16.4243	0.00103347	0.0281715	2.12681	1.46027	0.830611	40.7855	7.34841	25.3492
lnc-ZNF704-1:1	ZNF704	-14.1418	0.00222838	0.0396956	28.6657	20.8818	15.0894	2.59781	0	1.68995
lnc-ZNF727-7:1	ZNF727	-9.81091	0.00873601	0.0835505	26.5389	16.355	20.9037	5.71517	0	0
lnc-ZNF740-2:1	ZNF740	-12.5272	0.00200451	0.0376994	47.7146	30.9576	15.92	0.259781	1.22474	6.75978
lnc-ZNF775-2:3	ZNF775	86.7185	7.34672e-05	0.00680827	0	0	0.692176	44.6822	3.06184	14.3645
lnc-ZNF80-3:1	ZNF80	-13.1254	0.00720751	0.0758252	7.85996	15.7709	18.135	2.59781	0	0
lnc-ZNF800-2:2	ZNF800	11.0909	0.0258127	0.141342	5.54821	0	0	29.8748	9.18552	23.6592
lnc-ZNF814-1:4	ZNF814	-43.3995	2.49678e-05	0.00319296	22.1928	22.7801	22.7034	0.259781	0.612368	0.844973
lnc-ZNF814-1:5	ZNF814	45.6561	1.87921e-06	0.000702931	2.40422	2.1904	0.415305	18.4444	89.4057	125.056
lnc-ZNF843-2:2	ZNF843	-381.637	0.000193935	0.0111987	6.01056	7.88543	6.50645	0	0	0
